# Supplementary material for: Pragmatic accuracy of an in-house loop-mediated isothermal amplification (LAMP) for diagnosis of pulmonary tuberculosis in a Thai community hospital
Source: PubMed Central journal article supplement (PMC7377475; doi:10.1371/journal.pone.0236496), 2020-07-23
Supplement: pone.0236496.s004.pdf [file pone.0236496.s004.pdf]

# PLOS ONE

## Pragmatic accuracy of in-house loop-mediated isothermal amplification (LAMP) for diagnosis of pulmonary tuberculosis in a Thai community hospital

--Manuscript Draft--

|                               |                                                                                                                                                                                                                                                                                                                                                                                                                                                                                                                                                                                                                                                                                                                                                                                                                                                                                                                                                                                                                                                                                                                                                                                                                                                                                                                                                                                                                                                                                                                                                                                                                                                                                                                                                                                                                                                                                                                                                                                                           |
|-------------------------------|-----------------------------------------------------------------------------------------------------------------------------------------------------------------------------------------------------------------------------------------------------------------------------------------------------------------------------------------------------------------------------------------------------------------------------------------------------------------------------------------------------------------------------------------------------------------------------------------------------------------------------------------------------------------------------------------------------------------------------------------------------------------------------------------------------------------------------------------------------------------------------------------------------------------------------------------------------------------------------------------------------------------------------------------------------------------------------------------------------------------------------------------------------------------------------------------------------------------------------------------------------------------------------------------------------------------------------------------------------------------------------------------------------------------------------------------------------------------------------------------------------------------------------------------------------------------------------------------------------------------------------------------------------------------------------------------------------------------------------------------------------------------------------------------------------------------------------------------------------------------------------------------------------------------------------------------------------------------------------------------------------------|
| <b>Manuscript Number:</b>     | PONE-D-20-00432R1                                                                                                                                                                                                                                                                                                                                                                                                                                                                                                                                                                                                                                                                                                                                                                                                                                                                                                                                                                                                                                                                                                                                                                                                                                                                                                                                                                                                                                                                                                                                                                                                                                                                                                                                                                                                                                                                                                                                                                                         |
| <b>Article Type:</b>          | Research Article                                                                                                                                                                                                                                                                                                                                                                                                                                                                                                                                                                                                                                                                                                                                                                                                                                                                                                                                                                                                                                                                                                                                                                                                                                                                                                                                                                                                                                                                                                                                                                                                                                                                                                                                                                                                                                                                                                                                                                                          |
| <b>Full Title:</b>            | Pragmatic accuracy of in-house loop-mediated isothermal amplification (LAMP) for diagnosis of pulmonary tuberculosis in a Thai community hospital                                                                                                                                                                                                                                                                                                                                                                                                                                                                                                                                                                                                                                                                                                                                                                                                                                                                                                                                                                                                                                                                                                                                                                                                                                                                                                                                                                                                                                                                                                                                                                                                                                                                                                                                                                                                                                                         |
| <b>Short Title:</b>           | Diagnostic accuracy of in-house LAMP for pulmonary TB                                                                                                                                                                                                                                                                                                                                                                                                                                                                                                                                                                                                                                                                                                                                                                                                                                                                                                                                                                                                                                                                                                                                                                                                                                                                                                                                                                                                                                                                                                                                                                                                                                                                                                                                                                                                                                                                                                                                                     |
| <b>Corresponding Author:</b>  | Phichayut Phinyo<br>Chiang Mai University<br>Chiang Mai, Chiang Mai THAILAND                                                                                                                                                                                                                                                                                                                                                                                                                                                                                                                                                                                                                                                                                                                                                                                                                                                                                                                                                                                                                                                                                                                                                                                                                                                                                                                                                                                                                                                                                                                                                                                                                                                                                                                                                                                                                                                                                                                              |
| <b>Keywords:</b>              | pulmonary tuberculosis; LAMP; Diagnosis; sensitivity; Specificity                                                                                                                                                                                                                                                                                                                                                                                                                                                                                                                                                                                                                                                                                                                                                                                                                                                                                                                                                                                                                                                                                                                                                                                                                                                                                                                                                                                                                                                                                                                                                                                                                                                                                                                                                                                                                                                                                                                                         |
| <b>Abstract:</b>              | <p><b>Background:</b> To improve the quality of diagnosing pulmonary tuberculosis (TB), WHO recommends the use of rapid molecular testing as an alternative to conventional microscopic methods. Loop-mediated isothermal amplification assay (LAMP test) is a practical and cost-effective nucleic acid amplification technique. We evaluated the pragmatic accuracy of the in-house LAMP assay for the diagnosis of TB in a remote health care setting where an advanced rapid molecular test is not available.</p> <p><b>Methods:</b> A prospective diagnostic accuracy study was conducted. Patients with clinical symptoms suggestive of TB were consecutively enrolled from April to August 2016. Sputum samples were collected from each patient and were sent for microscopic examination (both acid-fast stain and fluorescence stain), in-house LAMP test, and TB culture.</p> <p><b>Results:</b> One hundred and seven patients with TB symptoms were used in the final analysis. This included 50 (46.7%) culture-positive TB patients and 57 (53.3%) culture-negative patients. The overall sensitivity of the in-house LAMP based on culture positivity was 88.8% (95%CI 81.2,94.1). The sensitivity was 90.9% (95%CI 78.3,97.5) for smear-positive, culture-positive patients, and was 16.7% (95%CI 0.4,64.1) for smear-negative, culture-positive patients. The overall sensitivity and accuracy of the in-house LAMP test compared to smear microscopy methods were not significantly different (<math>p=0.375</math> and <math>p=1.000</math>, respectively). The specificity of the in-house LAMP based on non-TB patients (smear-negative, culture-negative) was 94.7% (95%CI 85.4,98.9).</p> <p><b>Conclusions:</b> The diagnostic accuracy of the in-house LAMP test in a community hospital was comparable to other previous reports in terms of specificity. The sensitivity of the in-house assay could be improved with better sputum processing and DNA extraction method.</p> |
| <b>Order of Authors:</b>      | <p>Sarawut Toonkomdang</p> <p>Phichayut Phinyo</p> <p>Benjawan Phetsuksiri</p> <p>Jayanton Patumanond</p> <p>Janisara Rudeeaneksin</p> <p>Wiphat Klayut</p>                                                                                                                                                                                                                                                                                                                                                                                                                                                                                                                                                                                                                                                                                                                                                                                                                                                                                                                                                                                                                                                                                                                                                                                                                                                                                                                                                                                                                                                                                                                                                                                                                                                                                                                                                                                                                                               |
| <b>Response to Reviewers:</b> | <p>Responses to Reviewers' comments</p> <p>Pragmatic accuracy of loop-mediated isothermal amplification (LAMP) for diagnosis of pulmonary tuberculosis in a Thai community hospital</p> <p>Reviewer #1:</p> <p>1.The study aims to evaluate usefulness of a LAMP method in a practical setting in Thailand. The LAMP method is now available as an only commercial kit TB-LAMP assay (Loopamp™ MTBC Detection Kit, Eiken Chemical Company Ltd., Japan) as endorsed by WHO in 2016. It seems that the method used in this study is a unique</p>                                                                                                                                                                                                                                                                                                                                                                                                                                                                                                                                                                                                                                                                                                                                                                                                                                                                                                                                                                                                                                                                                                                                                                                                                                                                                                                                                                                                                                                            |

system at least partially. So, it is important to state explicitly that the target to be evaluated was an in-house LAMP and not one commercially available LAMP recommended by WHO.

oThe LAMP test in our study was a non-commercial, in-house LAMP.

oWe re-wrote the manuscript and emphasized that the test used was in-house LAMP.

2. In evaluating the sensitivity of the method, the authors used culture negative (clinically defined) cases, as well as bacteriologically confirmed cases, as a gold standard of the cases of TB. It may be difficult to admit the clinical diagnosis as a diagnostic basis for such a study as this, apart from clinical practice. Vice versa, the definition of the gold (conventional) standard for specificity (non-cases) should be reconsidered. The following paper may be of use in revising the paper; Kaku et al: Accuracy of LAMP-TB Method for Diagnosing Tuberculosis in Haiti. *Jpn. J. Infect. Dis.*, 69, 488–492, 2016.

oWe modified the inclusion criteria for analysis as suggested by both reviewers.

oAs the analysis was done in a per-patient fashion, patients with smear-positive and culture-negative results would be excluded, as these patients were considered as probable TB cases. Therefore, the evaluation of sensitivity would include patients with both smear positive and smear negative with positive culture results. In contrast, the evaluation of specificity would include only patients with smear-negative and culture-negative results.

Reviewer #2:

1. Abstract/Background: “proven diagnostic performance” – this is both vague and too specific at the same time, “most of the results were validated” – the results aren’t validated, the assay is validated

oWe rewrote the abstract and introduction part as suggested.

2. The language surrounding people with possible TB needs to be updated throughout the paper - avoid the use of terms like “TB suspects” that increase the stigma surrounding this disease.

[http://www.stoptb.org/assets/documents/resources/publications/acsm/LanguageGuide\\_ForWeb20131110.pdf](http://www.stoptb.org/assets/documents/resources/publications/acsm/LanguageGuide_ForWeb20131110.pdf)

oWe rewrote the abstract and introduction part as suggested.

3. The paper states repeatedly that there is little work published from resource-challenged settings, but this claim is not supported. Even the references given cite studies in such decentralized settings. Maybe it just hasn’t been done in Thailand? A better summary of the literature needs to be included. How does this compare to other studies? How is the TB LAMP test performed in this study compare to the TB LAMP tests in other published literature? A better focus on properly relating the current study to the body of work in the literature rather than trying to claim it is quite novel would actually strengthen the paper. There is merit in replication or demonstrating an important diagnostic in a new geographical area.

oWe rewrote the abstract and introduction part as suggested.

4. In-house vs commercialized kit is mentioned but not explained. And the position of this paper (what LAMP testing approach is used) is not properly placed in the context of what other papers are using and the potential impact on sensitivity/specificity.

oWe rewrote the abstract and introduction part as suggested.

5. The sensitivity/specificity of LAMP in other papers, settings, etc needs to be stated with numbers and not just alluded to. A proper, specific summary of the literature is lacking.

oWe rewrote the abstract and introduction part as suggested.

6. “In 2016, WHO suggested the use of LAMP assay for the diagnosis of pulmonary tuberculosis” – this is not quite right, WHO recommendations are very specific and it is important to get that right. From the abstract of the citation provided: “WHO recommends that TB-LAMP can be used as a replacement for microscopy for the diagnosis of pulmonary TB in adults with signs and symptoms of TB”. This needs to be stated correctly. Also, given the paper has mentioned in-house vs commercialized kits, it needs to be clarified that the WHO guidance refers only to the Eiken LAMP kit.

oWe rewrote the abstract and introduction part as suggested.

7. “LAMP assay has a low cost per test, does not required advanced technological facilities, and can be routinely practiced in general hospital laboratories [3].” Reference 3 doesn’t support this statement – it doesn’t say anywhere that the LAMP assay has a low cost per test. It says “Costs can be kept to a minimum if testing is limited to specimens from the most high-risk patients based on proper clinical assessments and national testing algorithms based on public health policies.” There are other

publications on the cost of the LAMP assay for TB diagnosis. The authors might explain better the infrastructure/training needed for LAMP based on this reference and others.

oWe rewrote the abstract and introduction part as suggested.

oWe changed the references to the statement as follow: Sohn H. Cost, affordability, and cost-effectiveness of TB-LAMP assay. In: Report to WHO Guideline Development Group Meeting on TB-LAMP Assay. Edn. Geneva: World Health Organization; 2016 and Shete PB, Farr K, Strnad L, Gray CM, Cattamanchi A. Diagnostic accuracy of TB-LAMP for pulmonary tuberculosis: a systematic review and meta-analysis. BMC Infect Dis. 2019;19(1):268. Published 2019 Mar 19. doi:10.1186/s12879-019-3881-y

8. Reference 5 doesn't appear to really relate to the sentences it comes after.

Reference 3 would make a lot more sense as it is a detailed overview of TB diagnostics including many molecular diagnostics.

oWe rewrote the abstract and introduction part as suggested.

#### Setting

1. The paper needs to do more to state what sets this setting apart from (or ties it to) other studies. See the methods section describing setting in reference 22 for how attributes of the specific site can be expressed in the context of the needs of LAMP.

oWe elaborated the character of our setting as suggested:

oLevel of health system: rural

oDistance to reference laboratory: 0 km

oMedian LAMP test workload: 6 (4-10)

oElectricity and backup power: infrequent power outages, power generator (350 Kw) and UPS (2.7 Kw)

oBiosafety cabinet infrastructure: BSC class II

oLaboratory staff: 4 lab technicians, 1 lab assistant

2. Study Design: This is not a cross-sectional design; it is a prospective design. The plan was to prospectively enroll 120 patients.

oWe changed the type of design to prospective diagnostic accuracy study as suggested.

oWe would like to make a constructive argument on this point, as the diagnostic accuracy research is actually cross-sectional study in design. The cross-sectional design is only the type of membership condition, single component of study base, and cross-sectional design can therefore be collected prospectively or retrospectively. We would like to ask you to kindly refer to this reference: Assessment of the accuracy of diagnostic tests: the cross-sectional study by Knottnerus JA, 2003.

Link: <https://www.ncbi.nlm.nih.gov/pubmed/14615003>

3. "New patients who were clinically suspected of 109 pulmonary TB (coughing for more than two weeks with or without hemoptysis), aged more than 18 years old were consecutively invited into the study regardless of nation status." Suggest re-writing to something more like: 'Adults more than 18yrs of age with symptoms indicative of pulmonary TB (coughing...) and no history of TB were consecutively enrolled regardless of national status.' If patients were 'invited' but not enrolled, we need numbers on how many declined.

oWe re-wrote the sentence as suggested: Adult patients aged more than 15 years old with symptoms indicative of pulmonary TB (coughing for more than two weeks with or without hemoptysis) and no history of TB were consecutively enrolled regardless of national status.

4. "Samples with contaminated culture results or samples from patients who were previously documented as TB cases were excluded." Were the patients excluded or the samples?

oPatients with previously documented TB cases were excluded.

oPatients with two contaminated or missing culture results were excluded.

#### Methods

1. A map of which samples were used for what tests would be quite helpful. Highlight if any of the reference tests (smear, LJ culture, MGIT culture) were performed on the same sputum as LAMP.

oConventional macroscopy, LAMP test, and culture were conducted as routinely done.

oAll patients were given three sealed containers for the collection of morning sputum specimens. Of all containers sent to the laboratory, only the one with seemingly adequate sputum, containing both mucoid or mucopurulent characters with a sample volume more than 3 ml, was used for the whole investigation procedures as routinely done. Specimens were sent for smear microscopy with conventional acid-fast bacilli

(AFB) staining with Ziehl-Neelsen technique and fluorescence acid-fast staining with Auramine O solution.

2. Make it clear somewhere that smear-negative refers to AFB smear-negative.

- o We added detail on the smear-negative status as suggested.
- o According to WHO definitions, any patient with at least two AFB smears of scanty grade or one or more smears of 1+ or more was defined as smear-positive case. Smear-negative case was conversely defined.

3. Study size estimation

This has no purpose here – the study is done. Sample size estimation is for study planning purposes, for securing funding and making sure the plan has statistical validity.

- o The study size estimation part was removed as suggested.

4. Statistical analysis. The first four sentences are unnecessary.

- o The first four sentences were removed as suggested.

5. The authors need to state what method was used to obtain the 95% CI for the sens/spec/PPV/NPV/LR+. It is clear from my testing that the Clopper Pearson binomial exact test was used, the authors should include the reference (usually found in the software documentation).

- o The 95% confidence intervals were calculated using the Clopper Pearson binomial exact method.
- o We added this statement in the statistical section and added the citation as suggested.

6. Kappa statistics are for inter-reader reliability, not for comparison of correlations between tests. It includes the concept that agreement may happen by chance when two people are guessing. However, it is not appropriate for comparison of diagnostic results because there isn't guessing – the samples should not agree by chance but because they are or are not TB and the sensitivities of tests objectively vary. Spearman's correlation can be used, but I think what you actually want is McNemar's test. The desire is to compare the diagnostic performance (i.e. accuracy) between tests – McNemar's test will do that. Alternatively, Spearman's correlation can look at the [objective] agreement between tests.

- o Spearman's rank correlation was inserted into the manuscript to represent the objective agreement between tests as suggested.
- o The agreement of LAMP test with smear microscopy methods was analyzed with Kappa's statistics and Spearman's rank correlation.
- o We still presented the value of Kappa's statistic [redacted] many of the previous studies on LAMP assay and other diagnostic tests had done [redacted]-3].

## Results

1. Table 1 is dedicated to showing the patient clinical characteristics by culture status. The p-values shown test whether these characteristics differ significantly dependent on culture status. It is expected that gender, nationality, and age should not differ. Whereas it is also expected that chest x-rays and sputum quality would differ. The baseline demographic data between culture 188 positive and negative patients were comparable except for the presence of cavitory lesions on 189 chest radiographs and the character of collected sputum (Table 1). Age, nationality, and gender are demographic data. Chest x-ray and sputum quality are clinical characteristics.

- o We reanalyzed all the data after exclusion of patients with probable TB (LAMP test positive and AFB smear positive patients with negative culture).
- o All the baseline demographic and clinical characteristics data were reanalyzed and presented in Table 1.
- o The statements in the results section were re-written as suggested.

2. Table 2 – re-check the NPV for parallel testing

- o We reanalyzed all the data after exclusion of patients with probable TB (LAMP test positive and AFB smear positive patients with negative culture).
- o All the data on Table 2 were checked for any error as suggested.

3. There are a lot of LAMP-positive and AFB smear-positive patients with negative culture. Especially given that the tests are done on different sputum samples, these should be considered patients with probable TB and not used in assessing sensitivity and specificity.

- o We reanalyzed all the data after exclusion of patients with probable TB (LAMP test positive and AFB smear positive patients with negative culture).
- o The final study size for analysis of LAMP test diagnostic accuracy was therefore 107 patients. (8 patients were excluded, 6 patients with both LAMP test and AFB smear-

positive and culture negative, 1 patient with AFB positive and culture negative, and 1 patient with fluorescence stain positive and culture negative)

4. There are too few smear-negative, culture-positive patients to assess sensitivity. Specificity should not be stratified by smear status, only sensitivity. For the reason above (that smear-positive, culture-negative patients shouldn't be included in estimations of sensitivity/specificity of LAMP), what the paper is calling 'smear-negative specificity' should in fact be reported as the actual specificity of LAMP.

- oWe exclude smear-positive, culture negative patients from the analysis as suggested.
- oWe reported the actual specificity of LAMP test without stratification.
- oWe acknowledged that our there are too few smear negative, culture positive patients to assess sensitivity in the discussion part.

5. Table 2 – the p-values shown have no real meaning! If you want to compare accuracy of tests, you cannot do a p-value over the final accuracy measures among a bunch of tests. You need to compare tests 1 against another by using 2x2 grids and McNemar's test. So, if you want to compare the accuracy of LAMP to the accuracy of AFB stain, you use the grid in Table 3 and McNemar's test:

- oThe comparison of diagnostic indices between LAMP test and AFB, fluorescence stain was re-analyzed using McNemar's exact probability test as suggested. We presented the result of the pairwise tests separately and reformatted Table 2.
- oPairwise testing was not performed to compare the specificity between the LAMP test and the smear microscopy methods as the specificity of the latter was affected by incorporation bias and would not be comparable to the in-house LAMP.
- oTable 3 was also reformatted.
- oSpearman's rank correlation was used as suggested.

#### Discussion

1. "This study had demonstrated the pragmatic performance of the LAMP test, which was comparable to that of the conventional smear microscopy and the fluorescence microscopy." Not true, the performance of LAMP as evaluated in this study was below that of smear microscopy.

oWe rewrote the discussion part as suggested.

o "This study had demonstrated the pragmatic diagnostic performance of the in-house LAMP assay in a remote hospital of a high TB burden country. It was revealed that the overall sensitivity of the in-house LAMP in our study was lower than the numbers reported in the majority of the previous in-house LAMP studies. Nonetheless, the specificity was comparable to other figures reported in literature. In comparison to microscopy methods, the AFB and fluorescence stain, the in-house LAMP was found to be inferior in terms of overall sensitivity (82.0% vs. 88.0%,  $p=0.375$ ) and accuracy (88.8% vs. 94.4%,  $p=1.000$ ); however, the comparative statistical test revealed non-significant results. Based on the result of our study, we suggest that the in-house LAMP should not be a substitute to conventional smear methods, but should be done in parallel, which would result in a higher sensitivity with fewer false-negative TB cases."

2. "Although the sensitivity and specificity of the LAMP test were lower than that of the acid-fast stain and the fluorescence stain, the comparative statistical test revealed non-significant results" This is still true when McNemar's test is performed, but the right statistical tests need to be used in the paper. Furthermore, a non-significant result doesn't mean no difference, it means the difference is likely smaller than the power of the study to detect.

oWe rewrote the discussion part as suggested.

oWe reanalyzed our data using McNemar's exact probability test as suggested.

3. Put PPV/NPV in the context of the local prevalence of disease! State from the literature or reliable source what the prevalence of TB is in the hospital's area of Thailand. I would suggest giving the readers an example: Given that prevalence and a group of 1000 patients, state how many would be true positives, false positive, true negatives, and false negatives. You can therefore assess what burden the different accuracies will place on the hospital. I.e. if the specificity is quite low and the sensitivity is higher, is that better? If the sensitivity is high and the specificity is lower, is that better? Relate this to the LR+.

oWe would like to make a constructive argument to this question as follow: The prevalence of culture-positive TB in this study was 46.7%. As this was a "consecutive recruitment of patients with sign and symptoms suggestive of pulmonary TB" or "patients with higher pre-test probability that the general prevalence" or the "person



that the in-house LAMP test was intended to be used”, the calculation of positive predictive values could be directly calculated and reported from the study data as in the other study [1]. Moreover, both the in-house LAMP assay and acid-fast stain were not intended to be used as screening tests in the general population. For this reason, we did not include this part in our manuscript; however, we provide the answer to the question in this response paper.

oThe latest Maesot’s population figures from the Health Data Center (HDC), the ministry of public health, Thailand, was 115,108 in 2019. The prevalence of pulmonary tuberculosis was 351 per 100,000 or 35 per 10,000.

TB caseNon-TB caseTotal

LAMP positive29528557PPV 29/557=5.2%

LAMP negative69,4379,443NPV 9437/9443=94.9%

Total359,96510,000Prevalence=0.0035

4. “In the clinical context of TB diagnosis, both the LAMP test and the smear microscopy are considered as a diagnostic test which would normally be done in TB suspects with high pre-test probability [14]” – this is not what the reference says.

oThe reference states “The TB LAMP assay is usually applied for TB-suspected patients and is rarely used for screening purpose. To rule-in the TB diagnosis, specificity is more important than sensitivity.”

oWhat we’re trying to imply from this statement was that the LAMP test was developed to be applied for patients who were suspicious of having TB with “higher pre-test probability than average person”. As the LAMP test was not for screening purpose, specificity is more important and should be more focused than sensitivity.

oAfter we re-analyzed the data with the exclusion of probable TB cases, our specificity increased to comparable level with previous studies. The parallel and serial testing was omitted from our analysis as the test accuracy of combination of the in-house LAMP with other smear microscopy methods would be seriously affected by incorporation bias (smear-positive, culture-negative patients were all excluded).

5. “Therefore, a serial test relying on both the result from the LAMP test and the acid-fast stain would be more appropriate for use as a rule-in test as it carried higher specificity and positive likelihood ratio than other methods.” Authors should define ‘rule-in’ test and what is generally expected of such a test. Should note the increased cost of such an approach.

oAfter we re-analyzed the data with the exclusion of probable TB cases, our specificity increased to comparable level with previous studies. The parallel and serial testing was omitted from our analysis as the test accuracy of combination of the in-house LAMP with other smear microscopy methods would be seriously affected by incorporation bias (smear-positive, culture-negative patients were all excluded).

6.The effect of a gold standard which is not itself perfect should be discussed. Also the variability between sputum samples should be discussed.

oThe use of routine TB culture as a reference standard might be inadequate, as some TB patients could be classified as not having TB [6]. Different culture media and techniques could be used in composite to achieve different performance characteristics[4]. With a higher quality reference standard, the sensitivity of the in-house LAMP should be increased when a portion of three remaining false-positive cases was re-classified as true-positive cases.

oThis study had a higher proportion of salivary sputum than mucous sputum. This could affect the diagnostic performance of both the index and the reference test[5]. The percentage of culture-positive TB cases was lower in salivary samples than in mucous samples (35.8% vs. 65.0%, p=0.005). Both the quality and quantity of sputum specimens were associated with positivity of smear, molecular testing methods (Xpert MTB/RIF and PCR), and TB culture [6,7]. Thus, it was possible that some patients with pulmonary TB might be classified as smear-negative, LAMP-negative, or even culture-negative cases. Interestingly, it was revealed from our data that the proportion of smear-positive, LAMP-positive results was also significantly lower in salivary sputum than in mucous sputum (31.3% vs 57.5%, p=0.009 and 29.9% vs. 60.0%, p=0.003, respectively). Therefore, the sensitivity and accuracy of all tests, including LAMP, might be underestimated. Previous studies reported that by improving the sputum quality, TB diagnostic yield increased[8,9]. Therefore, high-quality sputum collection must be encouraged both in practice and studies.

7.A better look at the differences between this study and others with better test performance needs to be done.

oIn this study, the sensitivity of the in-house LAMP test was 82.0% (95%CI 68.6-91.4) in culture-positive TB patients, respectively. In the past, several studies had reported a

|                                                                                                                                                                                                                                                                                                                          |                                                                                                                                                                                                                                                                                                                                                                                                                                                                                                                                                                                                                                                                                                                                                                                                                                                                                                                                                                                                                                                                                                                                                                                                                                                                                                                                                                                                                                                                                                                                                                                                                                                                                                                                                                                                                                                                                                                                                                                                                                                                                                                                                                                                                                                                                                                                                                                                                                                                                                                                                                                                                                                                                                                                                                                                                                                                                                                                                                                                                                                                                                                                                                                                                                                                                                                                                                                                                                                                                                                                                                                                                                                                                                                                                                                                                                                                                                                                                   |
|--------------------------------------------------------------------------------------------------------------------------------------------------------------------------------------------------------------------------------------------------------------------------------------------------------------------------|---------------------------------------------------------------------------------------------------------------------------------------------------------------------------------------------------------------------------------------------------------------------------------------------------------------------------------------------------------------------------------------------------------------------------------------------------------------------------------------------------------------------------------------------------------------------------------------------------------------------------------------------------------------------------------------------------------------------------------------------------------------------------------------------------------------------------------------------------------------------------------------------------------------------------------------------------------------------------------------------------------------------------------------------------------------------------------------------------------------------------------------------------------------------------------------------------------------------------------------------------------------------------------------------------------------------------------------------------------------------------------------------------------------------------------------------------------------------------------------------------------------------------------------------------------------------------------------------------------------------------------------------------------------------------------------------------------------------------------------------------------------------------------------------------------------------------------------------------------------------------------------------------------------------------------------------------------------------------------------------------------------------------------------------------------------------------------------------------------------------------------------------------------------------------------------------------------------------------------------------------------------------------------------------------------------------------------------------------------------------------------------------------------------------------------------------------------------------------------------------------------------------------------------------------------------------------------------------------------------------------------------------------------------------------------------------------------------------------------------------------------------------------------------------------------------------------------------------------------------------------------------------------------------------------------------------------------------------------------------------------------------------------------------------------------------------------------------------------------------------------------------------------------------------------------------------------------------------------------------------------------------------------------------------------------------------------------------------------------------------------------------------------------------------------------------------------------------------------------------------------------------------------------------------------------------------------------------------------------------------------------------------------------------------------------------------------------------------------------------------------------------------------------------------------------------------------------------------------------------------------------------------------------------------------------------------------|
|                                                                                                                                                                                                                                                                                                                          | <p>higher sensitivity of the in-house LAMP test, which ranges from 90.0 to 100.0%. Most of these studies were either University hospital, TB-specialized centers or hospitals, or national TB-specialized laboratory, which were generally equipped with highly-trained personnel and adequate infrastructural supports. The overall sensitivity of our in-house LAMP was consistent with two previous studies from India and Zambia, which was 79.5% (95%CI 64.0-89.0) and 81.4% (95%CI 71.6-89.0), respectively. Although both studies were performed in University hospitals, the LAMP procedures were modified to suit local conditions, and sputum processing and DNA extraction was done with commercial kits. The higher sensitivity of the acid-fast stain and the fluorescence stain in our study could be explained by the high prevalence of TB, the absence of HIV patient or a smaller number of patients with paucibacillary sputum, and the availability of skilled technicians</p> <p>8. "Currently, the WHO only supported the use of two rapid molecular tests for the diagnosis of 294 pulmonary tuberculosis, which were Xpert MTB/RIF and the LAMP test" – as the concept of LAMP test from a kit and other LAMP tests has been raised, and the variability of accuracy depending, it needs to be clear that the WHO recommendation is only for the Eiken LAMP test kit!</p> <p>oWe edited the statement as follow: "Currently, the WHO only supported the use of two rapid molecular tests for the diagnosis of pulmonary tuberculosis, which were Xpert MTB/RIF and the commercialized TB-LAMP assay".</p> <p>References</p> <ol style="list-style-type: none"> <li>1. George G, Mony P, Kenneth J. Comparison of the Efficacies of Loop-Mediated Isothermal Amplification, Fluorescence Smear Microscopy and Culture for the Diagnosis of Tuberculosis. PLoS ONE. 2011;6. doi:10.1371/journal.pone.0021007</li> <li>2. Phetsuksiri B, Rudeeaneksin J, Srisungngam S, Bunchoo S, Klayut W, Nakajima C, et al. Comparison of Loop-Mediated Isothermal Amplification, Microscopy, Culture, and PCR for Diagnosis of Pulmonary Tuberculosis. Jpn J Infect Dis. 2020;advpub. doi:10.7883/yoken.JJID.2019.335</li> <li>3. Wang Z, Sun H, Ren Z, Xue B, Lu J, Zhang H. Feasibility and Performance of Loop-Mediated Isothermal Amplification Assay in the Diagnosis of Pulmonary Tuberculosis in Decentralized Settings in Eastern China. BioMed Res Int. 2019;2019. doi:10.1155/2019/6845756</li> <li>4. Cudahy P, Shenoj S. Diagnostics for pulmonary tuberculosis. Postgrad Med J. 2016;92: 187–193. doi:10.1136/postgradmedj-2015-133278</li> <li>5. Shi J, Dong W, Ma Y, Liang Q, Shang Y, Wang F, et al. GeneXpert MTB/RIF Outperforms Mycobacterial Culture in Detecting Mycobacterium tuberculosis from Salivary Sputum. In: BioMed Research International [Internet]. 2018 [cited 12 Dec 2019]. Available: <a href="https://www.hindawi.com/journals/bmri/2018/1514381/">https://www.hindawi.com/journals/bmri/2018/1514381/</a></li> <li>6. Ho J, Marks GB, Fox GJ. The impact of sputum quality on tuberculosis diagnosis: a systematic review. Int J Tuberc Lung Dis Off J Int Union Tuberc Lung Dis. 2015;19: 537–544. doi:10.5588/ijtld.14.0798</li> <li>7. Yoon SH, Lee NK, Yim JJ. Impact of sputum gross appearance and volume on smear positivity of pulmonary tuberculosis: a prospective cohort study. BMC Infect Dis. 2012;12: 172. doi:10.1186/1471-2334-12-172</li> <li>8. Hirooka T, Higuchi T, Tanaka N, Ogura T. [The value of proper sputum collection instruction in detection of acid-fast bacillus]. Kekkaku. 2004;79: 33–37.</li> <li>9. Sicsú AN, Salem JI, Fujimoto LBM, Gonzales RIC, Cardoso M do S de L, Palha PF. Educational intervention for collecting sputum for tuberculosis: a quasi-experimental study 1. Rev Lat Am Enfermagem. 2016;24. doi:10.1590/1518-8345.0363.2703</li> </ol> |
| <b>Additional Information:</b>                                                                                                                                                                                                                                                                                           |                                                                                                                                                                                                                                                                                                                                                                                                                                                                                                                                                                                                                                                                                                                                                                                                                                                                                                                                                                                                                                                                                                                                                                                                                                                                                                                                                                                                                                                                                                                                                                                                                                                                                                                                                                                                                                                                                                                                                                                                                                                                                                                                                                                                                                                                                                                                                                                                                                                                                                                                                                                                                                                                                                                                                                                                                                                                                                                                                                                                                                                                                                                                                                                                                                                                                                                                                                                                                                                                                                                                                                                                                                                                                                                                                                                                                                                                                                                                                   |
| <b>Question</b>                                                                                                                                                                                                                                                                                                          | <b>Response</b>                                                                                                                                                                                                                                                                                                                                                                                                                                                                                                                                                                                                                                                                                                                                                                                                                                                                                                                                                                                                                                                                                                                                                                                                                                                                                                                                                                                                                                                                                                                                                                                                                                                                                                                                                                                                                                                                                                                                                                                                                                                                                                                                                                                                                                                                                                                                                                                                                                                                                                                                                                                                                                                                                                                                                                                                                                                                                                                                                                                                                                                                                                                                                                                                                                                                                                                                                                                                                                                                                                                                                                                                                                                                                                                                                                                                                                                                                                                                   |
| <p><b>Financial Disclosure</b></p> <p>Enter a financial disclosure statement that describes the sources of funding for the work included in this submission. Review the <a href="#">submission guidelines</a> for detailed requirements. View published research articles from <a href="#">PLOS ONE</a> for specific</p> | <p>The author(s) received no specific funding for this work.</p>                                                                                                                                                                                                                                                                                                                                                                                                                                                                                                                                                                                                                                                                                                                                                                                                                                                                                                                                                                                                                                                                                                                                                                                                                                                                                                                                                                                                                                                                                                                                                                                                                                                                                                                                                                                                                                                                                                                                                                                                                                                                                                                                                                                                                                                                                                                                                                                                                                                                                                                                                                                                                                                                                                                                                                                                                                                                                                                                                                                                                                                                                                                                                                                                                                                                                                                                                                                                                                                                                                                                                                                                                                                                                                                                                                                                                                                                                  |

examples.

This statement is required for submission and **will appear in the published article** if the submission is accepted. Please make sure it is accurate.

#### Unfunded studies

Enter: *The author(s) received no specific funding for this work.*

#### Funded studies

Enter a statement with the following details:

- Initials of the authors who received each award
- Grant numbers awarded to each author
- The full name of each funder
- URL of each funder website
- Did the sponsors or funders play any role in the study design, data collection and analysis, decision to publish, or preparation of the manuscript?
- **NO** - Include this sentence at the end of your statement: *The funders had no role in study design, data collection and analysis, decision to publish, or preparation of the manuscript.*
- **YES** - Specify the role(s) played.

\* typeset

#### Competing Interests

Use the instructions below to enter a competing interest statement for this submission. On behalf of all authors, disclose any [competing interests](#) that could be perceived to bias this work—acknowledging all financial support and any other relevant financial or non-financial competing interests.

This statement **will appear in the published article** if the submission is accepted. Please make sure it is accurate. View published research articles from [PLOS ONE](#) for specific examples.

The authors have declared that no competing interests exist.



**NO authors have competing interests**

Enter: *The authors have declared that no competing interests exist.*

**Authors with competing interests**

Enter competing interest details beginning with this statement:

*I have read the journal's policy and the authors of this manuscript have the following competing interests: [insert competing interests here]*

\* typeset

**Ethics Statement**

Enter an ethics statement for this submission. This statement is required if the study involved:

- Human participants
- Human specimens or tissue
- Vertebrate animals or cephalopods
- Vertebrate embryos or tissues
- Field research

Write "N/A" if the submission does not require an ethics statement.

General guidance is provided below. Consult the [submission guidelines](#) for detailed instructions. **Make sure that all information entered here is included in the Methods section of the manuscript.**

This study was approved by the Research Ethics Committee of Maesot General Hospital, The Ministry of Public Health (serial number 37/2015) and The Human Research Ethics Committee of Thammasat University, Faculty of Medicine (COA number 081/2016). The clinical samples used in this study were collected from all patients as routinely done. Informed consent was obtained from all patients prior to inclusion.

**Format for specific study types**

**Human Subject Research (involving human participants and/or tissue)**

- Give the name of the institutional review board or ethics committee that approved the study
- Include the approval number and/or a statement indicating approval of this research
- Indicate the form of consent obtained (written/oral) or the reason that consent was not obtained (e.g. the data were analyzed anonymously)

**Animal Research (involving vertebrate animals, embryos or tissues)**

- Provide the name of the Institutional Animal Care and Use Committee (IACUC) or other relevant ethics board that reviewed the study protocol, and indicate whether they approved this research or granted a formal waiver of ethical approval
- Include an approval number if one was obtained
- If the study involved *non-human primates*, add *additional details* about animal welfare and steps taken to ameliorate suffering
- If anesthesia, euthanasia, or any kind of animal sacrifice is part of the study, include briefly which substances and/or methods were applied

**Field Research**

Include the following details if this study involves the collection of plant, animal, or other materials from a natural setting:

- Field permit number
- Name of the institution or relevant body that granted permission

**Data Availability**

Authors are required to make all data underlying the findings described fully available, without restriction, and from the time of publication. PLOS allows rare exceptions to address legal and ethical concerns. See the [PLOS Data Policy](#) and [FAQ](#) for detailed information.

Yes - all data are fully available without restriction

A Data Availability Statement describing where the data can be found is required at submission. Your answers to this question constitute the Data Availability Statement and **will be published in the article**, if accepted.

**Important:** Stating 'data available on request from the author' is not sufficient. If your data are only available upon request, select 'No' for the first question and explain your exceptional situation in the text box.

Do the authors confirm that all data underlying the findings described in their manuscript are fully available without restriction?

**Describe where the data may be found in full sentences. If you are copying our sample text, replace any instances of XXX with the appropriate details.**

- If the data are **held or will be held in a public repository**, include URLs, accession numbers or DOIs. If this information will only be available after acceptance, indicate this by ticking the box below. For example: *All XXX files are available from the XXX database (accession number(s) XXX, XXX).*
- If the data are all contained **within the manuscript and/or Supporting Information files**, enter the following: *All relevant data are within the manuscript and its Supporting Information files.*
- If neither of these applies but you are able to provide **details of access elsewhere**, with or without limitations, please do so. For example:

*Data cannot be shared publicly because of [XXX]. Data are available from the XXX Institutional Data Access / Ethics Committee (contact via XXX) for researchers who meet the criteria for access to confidential data.*

*The data underlying the results presented in the study are available from (include the name of the third party*

All relevant data are within the manuscript and its Supporting Information files.

|                                                                                                                                                                                                                                         |  |
|-----------------------------------------------------------------------------------------------------------------------------------------------------------------------------------------------------------------------------------------|--|
| <p><i>and contact information or URL).</i></p> <ul style="list-style-type: none"><li>• This text is appropriate if the data are owned by a third party and authors do not have permission to share the data.</li></ul> <p>* typeset</p> |  |
| Additional data availability information:                                                                                                                                                                                               |  |

1 **Pragmatic accuracy of in-house loop-mediated isothermal amplification**  
2 **(LAMP) for diagnosis of pulmonary tuberculosis in a Thai community**  
3 **hospital**

4  
5 **Short title:** Diagnostic accuracy of in-house LAMP for pulmonary TB

6  
7 Sarawut Toonkomdang<sup>1</sup>, Phichayut Phinyo<sup>2,3\*</sup>, Benjawan Phetsuksiri<sup>4</sup>,  
8 Jayanton Patumanond<sup>3</sup>, Janisara Rudeeaneksin<sup>4¶</sup>, Wiphat Klayut<sup>4¶</sup>

9  
10 <sup>1</sup> Department of Medical Technology, Maesot General Hospital, Tak, Thailand.

11 <sup>2</sup>Department of Family Medicine, Faculty of Medicine, Chiang Mai University, Chiang Mai,  
12 Thailand.

13 <sup>3</sup> Center for Clinical Epidemiology and Clinical Statistics, Faculty of Medicine, Chiang Mai  
14 University, Chiang Mai, Thailand.

15 <sup>4</sup>National Institute of Health, Department of Medical Sciences, Ministry of Public Health,  
16 Nonthaburi, Thailand.

17  
18 \*Corresponding author:

19 E-mail: phichayutphinyo@gmail.com (PP)

20 ¶These authors contributed equally to this work.

21



## 22 **Abstract**

23 **Background:** To improve the quality of diagnosing pulmonary tuberculosis (TB), WHO  
24 recommends the use of rapid molecular testing as an alternative to conventional microscopic  
25 methods. Loop-mediated isothermal amplification assay (LAMP test) is a practical and cost-  
26 effective nucleic amplification technique. We evaluated the pragmatic accuracy of the in-  
27 house LAMP assay for the diagnosis of TB in a remote health care setting where an advanced  
28 rapid molecular test is not available.

29 **Methods:** A prospective diagnostic accuracy study was conducted. Patients with clinical  
30 symptoms suggestive of TB were consecutively enrolled from April to August 2016. Sputum  
31 samples were collected from each patient and were sent for microscopic examination (both  
32 acid-fast stain and fluorescence stain), in-house LAMP test, and TB culture.

33 **Results:** One hundred and seven patients with TB symptoms were used in the final analysis.  
34 This included 50 (46.7%) culture-positive TB patients and 57 (53.3%) culture-negative  
35 patients. The overall sensitivity of the in-house LAMP based on culture positivity was 88.8%  
36 (95%CI 81.2,94.1). The sensitivity was 90.9% (95%CI 78.3,97.5) for smear-positive, culture-  
37 positive patients, and was 16.7% (95%CI 0.4,64.1) for smear-negative, culture-positive  
38 patients. The overall sensitivity and accuracy of the in-house LAMP test compared to smear  
39 microscopy methods were not significantly different ( $p=0.375$  and  $p=1.000$ , respectively).  
40 The specificity of the in-house LAMP based on non-TB patients (smear-negative, culture-  
41 negative) was 94.7% (95%CI 85.4,98.9).

42 **Conclusions:** The diagnostic accuracy of the in-house LAMP test in a community hospital  
43 was comparable to other previous reports in terms of specificity. The sensitivity of the in-  
44 house assay could be improved with better sputum processing and DNA extraction method.

45 **Keywords:** Pulmonary Tuberculosis, in-house LAMP, Diagnosis, Sensitivity, Specificity

46

## 47 **Introduction**

48 Tuberculosis (TB), an airborne communicable disease, has long been considered a significant  
49 threat to global public health. According to The World Health Organization (WHO), 10  
50 million people were newly infected with TB in 2018. Although the incidence and prevalence  
51 of TB vary greatly across the globe, 87% of total cases resided within 30 countries with high  
52 TB burden, including Thailand, where the incidence rate was 153 cases per 100,000  
53 population in 2018. Early diagnosis and timely treatment is an essential component of The  
54 End TB Strategy endorsed by the WHO, aiming to end the global TB epidemic by the year  
55 2035 [2]. However, TB is still underdiagnosed and undertreated, especially in resource-  
56 limited countries due to the lack of highly sensitive and specific diagnostic tools which are  
57 usually expensive and require adequate infrastructure [1,3]. Novel diagnostic methods with  
58 enough simplicity and cost-effectiveness are therefore necessary to improve accurate  
59 identification of TB patients in these particular settings [3,4].

60  
61 Molecular testing methods such as polymerase chain reaction (PCR) or Xpert MTB/RIF have  
62 been widely acknowledged as alternative tools for the diagnosis of TB patients [3,5]. These  
63 nucleic amplification techniques were known for yielding rapid and accurate TB diagnosis,  
64 which would overcome the limitations of classical methods, insensitivity for smear  
65 microscopy, and lengthy incubation period for TB culture. However, several obstacles remain  
66 for the application of these molecular tests as point-of-care testing in community settings  
67 because of their complexity in execution and substantial requirements for financial and  
68 personnel resources [3,6]. Loop-mediated isothermal amplification (LAMP) assay is another  
69 recently developed nucleic acid amplification technique. Unlike PCR, where the  
70 amplification of DNA fragment occurs in temperature-dependent steps, the reaction of LAMP  
71 assay functions in isothermal or constant temperature conditions [7,8]. In 2016, WHO

72 suggest the use of commercial TB-LAMP assay (Eiken Chemical Co., Tokyo, Japan) as a  
73 replacement for smear microscopy for the diagnosis of TB in patients with symptoms  
74 suggestive of TB [9]. TB-LAMP assay has a low cost per test, does not required advanced  
75 technological facilities, and can be routinely practiced in general hospital laboratories [6,10].  
76  
77 As financial resources are usually limited in countries with high TB prevalence, setting up an  
78 infrastructure to support the commercial TB-LAMP could still be unattainable. A more  
79 affordable in-house LAMP was developed in 2008 [11]. The main advantage of the in-house  
80 assay was that it could be implemented on the readily-available infrastructure of any laboratory,  
81 even in the decentralized. However, it did require extra-training and skill of technicians  
82 to process the clinical specimens. In the past decades, several clinical studies and meta-  
83 analyses had evaluated the diagnostic accuracy of the in-house LAMP for the diagnosis  
84 of pulmonary TB [12–14] (S1 Table). From the latest meta-analysis, the overall sensitivity  
85 and specificity of the in-house LAMP is 93.0% (95%CI 88.9-95.7) and 91.8% (95%CI  
86 86.4-95.1), respectively [14]. One recent study in Thailand reported the sensitivity and the  
87 specificity of the in-house LAMP at 94.4% (95%CI 88.9-97.7) and 94.3% (95%CI 87.2-  
88 98.1), respectively [15]. However, the reported accuracy could be overestimated if being  
89 assessed in qualified laboratories with highly skilled technicians and sufficient resources  
90 where molecular tests usually are available [14]. Therefore, this study aimed to evaluate the  
91 pragmatic accuracy of the in-house LAMP assay for the diagnosis of pulmonary TB in a  
92 peripheral community hospital of a developing country with a high TB burden.

93

## 94 **Materials and Methods**

95

### 96 **Ethics Statement**

97 This study was approved by the Research Ethics Committee of Maesot General Hospital, The  
98 Ministry of Public Health (serial number 37/2015) and The Human Research Ethics  
99 Committee of Thammasat University, Faculty of Medicine (COA number 081/2016). The  
100 clinical samples used in this study were collected from all patients as routinely done.  
101 Informed consent was obtained from all patients prior to inclusion.

102

### 103 **Setting**

104 The study was settled in Maesot General Hospital, a large-sized community hospital with 365  
105 in-patient beds. The hospital is located in Maesot district in Tak (province), which shares the  
106 border with Myanmar and provides standard health care to both Thai and non-Thai patients  
107 (Burmese immigrants and ethnic minorities). According to the Health Data Center, the  
108 ministry of public health, Thailand, the incidence rate of pulmonary TB in Maesot was 351  
109 per 100,000 in 2019. The level of health care system of the hospital is considered rural.  
110 Maesot hospital has its own reference laboratory with biosafety cabinet infrastructure, BSC  
111 class II. There are four lab technicians and one lab assistant within each working shift. Power  
112 generator (350 kW) and UPS (2.7 kW) were available in case of power outages, which was  
113 infrequent. Median LAMP test workload per day was 6 (range 4-10).

114

### 115 **Study Design**

116 This prospective diagnostic accuracy research was conducted from April to August 2016.  
117 Adult patients aged more than 15 years old with symptoms indicative of pulmonary TB

118 (coughing for more than two weeks with or without hemoptysis) and no history of TB were  
119 consecutively enrolled regardless of nationality status. Patients with previously documented  
120 TB history or patients with two contaminated or missing cultures were excluded from the  
121 study.

122

## 123 **Methods**

124 All patients were given three sealed containers for the collection of morning sputum  
125 specimens. Of all containers sent to the laboratory, only the one th seemingly adequate  
126 sputum containing both mucoid or mucopurulent characters with a sample volume of more  
127 than 3 ml, was used for the whole investigation procedures as routinely done. Specimens  
128 were sent for smear microscopy with conventional acid-fast bacilli (AFB) staining with  
129 Ziehl-Neelsen technique and fluorescence acid-fast staining with Auramine O solution.  
130 Smear-positive case was defined according to WHO definitions as the presence of at least  
131 two smears of scanty grade or one or more smears of 1+ or more. A smear negative case or  
132 AFB smear-negative was conversely defined 

133

### 134 **Sputum decontamination and culture examination**

135 For the sputum decontamination process, the collected samples and 2% N-Acetyl-L-cysteine  
136 (NALC) NaOH were poured into a 50 ml sterile centrifuge tube in an equal proportion and  
137 were subsequently mixed by vortexing for 30 seconds and left at room temperature (20-25°C)  
138 for 15 minutes. Then, the test tubes were filled with phosphate buffer saline (pH 6.8) until the  
139 volume reached the level of 50 ml. The samples were put in a high-speed refrigerated  
140 centrifuge at 3,000 g for 20 minutes. Next, the supernatants were poured off, leaving the tube



141 with decontaminated sputum samples. Finally, a drop (1 ml) of phosphate buffer saline (pH  
142 6.8) was used for resuspension of the specimen.

143

144 For TB culture, the reference test, we performed both conventional culture method on L-J  
145 (Lowenstein-Jensen) medium and BBL MGIT 960 (mycobacterial growth indicator tube)  
146 culture method. The culture media were inoculated with processed sputum specimens and  
147 incubated at 35 to 37°C and monitored weekly for growth until 8 weeks. The sputum samples  
148 were considered as “culture-positive” if growth was detected in either of L-J or MGIT  
149 culture, regardless of the smear status. If growth was not detected in neither of the culture  
150 methods and both microscopy results were negative, the samples were considered as “culture-  
151 negative” or “non-TB patients”. Patients with smear-positive and culture-negative, which  
152 were generally considered as probable TB, were excluded from the analysis. Both smear  
153 microscopy and culture methods were performed according to the standard protocols [16].

154

### 155 **In-house LAMP test**

156 The LAMP test consists of three steps as follows: DNA extraction, isothermal amplification,  
157 and visual interpretation with fluorescence. The National Institute of Health of Thailand had  
158 developed the TB Fast Amp technique (a modified LAMP procedure) to suite local practice  
159 since 2009. The procedures were described as follow. Flexi Gene<sup>®</sup> DNA Kit (Qiagen co.,  
160 USA) and Protenase K Kit (Qiagen co., USA) were used for DNA extraction [17,18]. Four  
161 primers (MTB primers, MAV primers, MIN primers, and Muniv primers) were used for the  
162 recognition of six distinct regions on the 16S ribosomal RNA gene of *M. tuberculosis*. Each  
163 single LAMP reaction includes 12 µl of TB-Fast AMP mixture (FastAMP master mix  
164 includes 2 µl 10Xbuffer, 4 µl 2mM dNTPs, 3.2 µl 5M betaine, 1.2 µl 100 mM MgSO<sub>4</sub>, 1.6 µl  
165 primer mixture), 1 µl *Bst* DNA polymerase enzyme, 1 µl fluorescent detection reagent and 6

166 µl of extracted DNA samples. Amplification of reaction mixture was performed in the  
167 heating blocks at 65 °C for 60 minutes, then examined directly by visual observation. The  
168 LAMP assay was considered “positive” if the color of the reaction mixture changed from  
169 orange to green or fluorescence was directly observed with the naked eyes. The test was  
170 considered “negative” if the color of the mixture remained unchanged. For quality control,  
171 positive control (test tube with *M. tuberculosis* genetic materials) and negative control (test  
172 tube without *M. tuberculosis* genetic materials) were included in all runs.

173

## 174 **Statistical Analysis**

175 We used Fisher’s exact probability test for comparison of differences in independent  
176 proportions and Student’s t-test for two independent means. The sensitivity, specificity,  
177 positive predictive values (PPV), negative predictive values (NPV), and positive and negative  
178 likelihood ratios were calculated and reported with its 95% confidence interval. The 95%  
179 confidence interval were estimated using the Clopper Pearson binomial exact method. The  
180 comparison of sensitivity, specificity, and overall test accuracy between the LAMP test and  
181 smear microscopy methods was performed with McNemar’s exact probability test. Pairwise  
182 testing to compare the specificity between the LAMP test and the smear microscopy methods  
183 was not performed as the specificity of the latter was affected by incorporation bias and  
184 would not be comparable to the in-house LAMP. The agreement of the LAMP test with  
185 smear microscopy methods was analyzed with Kappa’s statistics and Spearman’s rank  
186 correlation. P-values of less than 0.05 were considered statistically significant. All statistical  
187 analyses were done using Stata version 16 (StataCorp, Texas).

188

189 **Results**

190 A total of 120 patients to be evaluated for TB were consecutively included from April to  
191 August 2016. Three patients with two contaminated cultures, two patients who subsequently  
192 were detected as previously documented TB cases, and eight patients who had smear-positive  
193 and culture-positive results were excluded from the analysis; only 107 patients remained in  
194 the study (Fig. 1). Most of the included patients were male (60% vs. 40%) with a mean age of  
195 47 years old. Fifty (46.7%) were culture-positive TB patients and 57 (53.3%) were culture-  
196 negative patients. The baseline demographic data between culture-positive and culture-  
197 negative patients were comparable. For clinical characteristics, the presence of cavitary  
198 lesions on chest radiographs and the character of collected sputum was found to be  
199 significantly different (Table 1). Culture-positive TB patients had higher proportion of  
200 cavitary lesions (14.0% vs. 1.8%,  $p=0.024$ ) and mucous sputum specimen (52.0% vs 24.6%,  
201  $p=0.005$ ) than patients with negative TB culture.

202

203

204 **Table 1. Demographic and clinical characteristics of the patients by TB culture status**

| Characteristics          | TB Culture Positive<br>(S+ or S-, C+) | TB Culture Negative<br>(S-, C-) | P-Value |
|--------------------------|---------------------------------------|---------------------------------|---------|
|                          | n=50 (46.7%)                          | n=57 (53.3%)                    |         |
| Gender                   |                                       |                                 |         |
| Male                     | 30 (60.0)                             | 36 (63.2)                       | 0.842   |
| Female                   | 20 (40.0)                             | 21 (36.8)                       |         |
| Nationality              |                                       |                                 |         |
| Thai                     | 28 (56.0)                             | 21 (36.8)                       | 0.054   |
| Non-Thai                 | 22 (44.0)                             | 36 (63.2)                       |         |
| Age (year, mean±SD)      | 48.7±17.4                             | 45.8±18.7                       | 0.408   |
| Chest radiographs        |                                       |                                 |         |
| Without cavitary lesions | 43 (86.0)                             | 56 (98.2)                       | 0.024   |
| With cavitary lesions    | 7 (14.0)                              | 1 (1.8)                         |         |
| Character of sputum      |                                       |                                 |         |
| Salivary                 | 24(48.0)                              | 43 (75.4)                       | 0.005   |
| Mucous                   | 26 (52.0)                             | 14 (24.6)                       |         |

205 Abbreviations: TB, tuberculosis; C, culture (+ positive or – negative); S, smear microscopy (+ positive or – negative); SD,  
206 standard deviation.

207

208 **Fig. 1. Study flow diagram of patient enrollment and results of index and reference test**  
209 **based on culture result**

210

211

212 The overall sensitivity of the LAMP test was 82.0% (95%CI 68.6-91.4), whereas the  
213 sensitivity in smear-positive, culture-positive patients and smear-negative, culture-positive  
214 was 90.9% (95%CI 78.3-97.5) and 16.7% (95%CI 0.4-64.1), respectively. The overall  
215 sensitivity of both the AFB and the fluorescence stain was slightly higher than that of the  
216 LAMP test; however, the differences were non-significant (Table 2). The specificity, positive  
217 predictive value, and negative predictive value of LAMP test was 94.7% (95%CI 85.4-98.9),  
218 93.2% (95%CI 81.3-98.6), and 85.7% (95%CI 74.6-93.3), respectively. The positive and  
219 negative likelihood ratios of the LAMP test was 15.6 (95%CI 4.47-82.12) and 0.19 (95%CI  
220 0.08-0.44), respectively. Even though the accuracy measures for the diagnosis of TB cases  
221 were shown to vary across different test methods (LAMP test, AFB stain, and fluorescence  
222 stain), the differences were without statistical significance (Table 2).

223 LAMP test results were highly correlated with those of AFB and fluorescence stain  
224 (Spearman's rho 0.85,  $p < 0.001$ ) in the diagnosis of culture-positive TB cases (Table 3). The  
225 in-house LAMP also showed substantial to almost perfect agreement with both microscopy  
226 methods in the diagnosis of culture-positive cases (Kappa 0.85, 95%CI 0.74,0.95) (Table 3).

227



228 **Table 2. Diagnostic accuracy of the in-house LAMP test, AFB stain, and Fluorescence**

229 **stain.**

| Method                              | Sensitivity% (95% CI), no. corrects |                            |                              | Specificity%                   | Accuracy                      | PPV%<br>(95% CI)      | NPV<br>(95% CI)     | LR+<br>(95% CI)    | LR-<br>(95% CI)  |
|-------------------------------------|-------------------------------------|----------------------------|------------------------------|--------------------------------|-------------------------------|-----------------------|---------------------|--------------------|------------------|
|                                     | S+, C+                              | S-, C+                     | Any S, C+                    | (95% CI),<br>no. corrects      | (95% CI),<br>no. corrects     |                       |                     |                    |                  |
|                                     | (n=44)                              | (n=6)                      | (n=50)                       | S-, C-<br>(n=57)               | (n=107)                       |                       |                     |                    |                  |
| LAMP                                | 90.9<br>(78.3,97.5),<br>N=40        | 16.7<br>(0.4,64.1),<br>n=1 | 82.0<br>(68.6,91.4),<br>n=41 | 94.7<br>(85.4,98.9),<br>n=54   | 88.8<br>(81.2,94.1),<br>n=95  | 93.2<br>(81.3,98.6)   | 85.7<br>(74.6,93.3) | 15.6<br>(4.5,82.1) | 0.2<br>(0.1,0.4) |
| AFB stain                           | -                                   | -                          | 88.0<br>(75.7,95.5),<br>n=44 | 100.0<br>(93.7,100.0),<br>n=57 | 94.4<br>(88.2,97.9),<br>n=101 | 100.0<br>(93.7,100.0) | 90.5<br>(80.4,96.4) | -                  | -                |
| Fluorescence stain                  | -                                   | -                          | 88.0<br>(75.7,95.5),<br>n=44 | 100.0<br>(93.7,100.0),<br>n=57 | 94.4<br>(88.2,97.9),<br>n=101 | 100.0<br>(93.7,100.0) | 90.5<br>(80.4,96.4) | -                  | -                |
| LAMP test vs.<br>AFB stain          |                                     |                            | P=0.375*                     | P=0.250*                       | P=1.000*                      |                       |                     |                    |                  |
| LAMP test vs.<br>Fluorescence stain |                                     |                            | P=0.375*                     | P=0.250*                       | P=1.000*                      |                       |                     |                    |                  |

230 \*P-values from McNemar's Exact probability test

231 Abbreviations: AFB, acid fast bacilli; C, culture (+ positive or – negative); CI, confidence interval; LAMP, loop-mediated

232 isothermal amplification; LR+, positive likelihood ratio; LR-, negative likelihood ratio; no. correct, number correctly

233 identified; NPV, negative predictive value; PPV, positive predictive value; S, smear microscopy (+ positive or – negative).

234

235 **Table 3. Diagnostic agreement and correlation between the in-house LAMP test and**  
 236 **AFB stain-fluorescence stain.**

| LAMP Test                | AFB Stain & Fluorescence stain |          |       |
|--------------------------|--------------------------------|----------|-------|
|                          | Positive                       | Negative | Total |
| Positive                 | 40                             | 4        | 44    |
| Negative                 | 4                              | 59       | 63    |
| Total                    | 44                             | 63       | 107   |
| Agreement (%)            | 92.5%                          |          |       |
| Kappa (95%CI, p-value)   | 0.85 (0.74, 0.96) p<0.001      |          |       |
| Spearman's rho (p-value) | 0.85 (0.74, 0.96) p<0.001      |          |       |

237 Abbreviations: LAMP, loop-mediated isothermal amplification; CI, confidence interval.

238

239

240

## 241 Discussion

242 This study has demonstrated the pragmatic diagnostic performance of the in-house LAMP  
243 assay in a remote hospital of a high TB burden country. It was revealed that the overall  
244 sensitivity of the in-house LAMP in our study was lower than the numbers reported in the  
245 majority of the previous in-house LAMP studies. Nonetheless, the specificity was  
246 comparable to other figures reported in the literature. In comparison to microscopy methods,  
247 the AFB and fluorescence stain, the in-house LAMP was found to be inferior in terms of  
248 overall sensitivity (82.0% vs. 88.0%,  $p=0.375$ ) and accuracy (88.8% vs. 94.4%,  $p=1.000$ );  
249 however, the comparative statistical test revealed no significant results. Based on the result  
250 of our study, we suggest that the in-house LAMP should not be a substitute to conventional  
251 smear methods, but should be done in parallel, which would result in a higher sensitivity with  
252 fewer false-negative TB cases.

253  
254 In this study, the sensitivity of the in-house LAMP test was 82.0% (95%CI 68.6-91.4) in  
255 culture-positive TB patients, respectively. In the past, several studies had reported a higher  
256 sensitivity of the in-house LAMP test, which ranges from 90.0 to 100.0% [11,15,19–24].  
257 Most of these studies were either University hospitals, TB-specialized centers or hospitals, or  
258 national TB-specialized laboratories, which were generally equipped with highly-trained  
259 personnel and adequate infrastructural supports. The overall sensitivity of our in-house  
260 LAMP was consistent with two previous studies from India and Zambia, which was 79.5%  
261 (95%CI 64.0-89.0) and 81.4% (95%CI 71.6-89.0), respectively [12,25]. Although both  
262 studies were performed in University hospitals, the LAMP procedures were modified to suit  
263 local conditions, and sputum processing and DNA extraction was done with commercial kits.  
264 The higher sensitivity of the acid-fast stain and the fluorescence stain in our study could be  
265 explained by the high prevalence of TB, the absence of HIV patients or less number of

266 patients with paucibacillary sputum, and the availability of skilled technicians [12,26–28].  
267 Besides, specimen decontamination with concentrated NaOH decreases the amount of viable  
268 genetic materials for amplification, which could reduce the sensitivity of both the LAMP test  
269 and TB cultures. A lower concentration of NaOH (1-1.5%) or NaOH free methods during  
270 sample decontamination may be suggested [12,29]. The sensitivity of the LAMP test in  
271 smear-negative specimens could not be accurately estimated in this study as there were too  
272 few smear-negative, culture-positive patients.

273

274 The overall specificity of the LAMP test was 94.7% (95%CI 85.4-98.9) for non-TB patients,  
275 respectively. This was in concordance with a recent meta-analysis, which reported pooled  
276 specificity of the in-house LAMP at 91.8% (95%CI 86.4-95.1) [14]. However, it was  
277 concluded that the specificity of the in-house assays was lower than that of the Loopamp  
278 commercial kit, which was reported at 96.5% (95%CI 94.7-97.7). A false positive LAMP  
279 result in smear-positive cases was frequently encountered in routine practice, which could be  
280 explained by multiple factors such as higher temperature, higher humidity, suboptimal  
281 reagents volume, and crossover contamination [14,30]. For in-house LAMP, an extensive  
282 laboratory technician training and continuous quality assessment should be conducted to  
283 lessen the risk of false-positive results. However, other potential factors might still account  
284 for the low specificity, such as temperature controls and volume of reaction used. For  
285 temperature, only available water bath was applied for temperature controls during LAMP  
286 procedures instead of a more stable dry heating block. A recent study suggested a high  
287 reaction volume of 30-35 µl due to the risk of self-priming in concentrated reagents [30].

288

289 Currently, the WHO only supports the use of two rapid molecular tests for the diagnosis of  
290 pulmonary TB, which were Xpert MTB/RIF and the commercialized TB-LAMP assay [9].

291 According to previous studies, both had shown comparable performance in smear-positive  
292 samples, but higher sensitivity was shown in Xpert MTB/RIF than in the LAMP test [6,25].  
293 Xpert MTB/RIF has been endorsed for use in the diagnosis of TB in many countries,  
294 including Thailand [4,31]. Nonetheless, Xpert MTB/RIF might not be suitable in peripheral  
295 regions with poor infrastructure as the instrument requires a stable electricity supply and an  
296 appropriate environment. The device also requires high continuous maintenance costs leading  
297 to a relatively high cost per test compared to the LAMP test. The LAMP test is readily  
298 available and can be done in any resource-poor settings with regular infrastructure and  
299 technicians with adequate training. In Thailand, only a portion of patients, not including  
300 foreigners and ethnic minorities, could reimburse the cost for Xpert MTB/RIF due to the  
301 regulation stated by The National Health Security Office (NHSO). To effectively prevent the  
302 spread of TB, all patients to be evaluated for TB should have equal access to high-quality  
303 diagnostic tools. Therefore, smear microscopy and the LAMP test may be more applicable in  
304 terms of accessibility and affordability, especially in the distant areas and the borderlands.

305

306 However, there may be some limitations to this study. First, the study size might not be  
307 powered enough to confirm the statistical insignificance of the between-test comparison.  
308 Second, no patients with HIV infection were included during the study period, as HIV status  
309 could be influential to the diagnostic performance of both the smear microscopy and the  
310 LAMP test, especially in areas with a high prevalence of TB-HIV coinfection. Third, this  
311 study had a higher proportion of salivary sputum than mucous sputum. This could affect the  
312 diagnostic performance of both the index and the reference test [32]. The percentage of  
313 culture-positive TB cases was lower in salivary samples than in mucous samples (35.8% vs.  
314 65.0%,  $p=0.005$ ). Both the quality and quantity of sputum specimens were associated with  
315 the positivity of smear, molecular testing methods (Xpert MTB/RIF and PCR), and TB



316 culture [33,34]. Thus, it was possible that some patients with pulmonary TB might be  
317 classified as smear-negative, LAMP-negative, or even culture-negative cases. No previous  
318 study had officially addressed the effect of sputum quality on the LAMP test. Moreover, the  
319 character of sputum specimens was rarely reported. Interestingly, it was revealed from our  
320 data that the proportion of smear-positive, LAMP-positive results was also significantly  
321 lower in salivary sputum than in mucous sputum (31.3% vs. 57.5%,  $p=0.009$  and 29.9% vs.  
322 60.0%,  $p=0.003$ , respectively). Therefore, the sensitivity and accuracy of all tests, including  
323 LAMP, might be underestimated. Previous studies reported that by improving the sputum  
324 quality, TB diagnostic yield increased [35,36]. Thus, high-quality sputum collection must be  
325 encouraged both in practice and studies.

326

327 Finally, the use of routine TB culture as a reference standard might be inadequate, as some  
328 TB patients could be classified as not having TB [6]. With a higher quality reference  
329 standard, the sensitivity of the in-house LAMP should be increased when a portion of three  
330 remaining false-positive cases was re-classified as true-positive cases. Different culture media  
331 and techniques could be used in composite to achieve different performance characteristics  
332 [37]. In our study, two different culture techniques, L-J and MGIT, were used to increase the  
333 diagnostic rate of TB[38]. We also applied a strict diagnostic definition in calculating  
334 specificity by considering only patients with smear-negative and culture-negative results[39].

335

## 336 **Conclusions**

337 In conclusion, the LAMP test is a practical and affordable nucleic amplification technique for  
338 the diagnosis of pulmonary TB, which should be implemented in resource-limiting settings  
339 where Xpert MTB/RIF is unavailable. The diagnostic accuracy of the in-hose LAMP was  
340 similar to previous studies for specificity. Better sputum processing and DNA extraction

341 method should be identified to improve the test sensitivity. The overall accuracy of the in-  
342 house LAMP test was comparable to that of conventional microscopy and fluorescence  
343 microscopy with minimal inferiority in terms of sensitivity. Therefore, a parallel examination  
344 of both smear microscopy and the in-house LAMP test is suggested to minimize the risk of  
345 false-negative results, especially in an endemic area.

346

## 347 **Acknowledgements**

348 The authors wish to acknowledge the contributions of all the medical and nursing staff of the  
349 TB clinic at Maesot hospital for their help in data collection, and all relevant personnel of  
350 The National Institute of Health, Department of Medical Science, The Ministry of Public  
351 Health for their technical advice and support.

352

## 353 **References**

- 354 1. World Health Organization. Global Tuberculosis Report 2018. World Health Organization;  
355 2018.
- 356 2. Uplekar M, Weil D, Lonroth K, Jaramillo E, Lienhardt C, Dias HM, et al. WHO's new end TB  
357 strategy. *Lancet Lond Engl.* 2015;385: 1799–1801. doi:10.1016/S0140-6736(15)60570-0
- 358 3. Parsons LM, Somoskövi Á, Gutierrez C, Lee E, Paramasivan CN, Abimiku A, et al. Laboratory  
359 Diagnosis of Tuberculosis in Resource-Poor Countries: Challenges and Opportunities. *Clin*  
360 *Microbiol Rev.* 2011;24: 314. doi:10.1128/CMR.00059-10
- 361 4. Kim C-K, Cho EA, Shin DM, Choi SW, Shin SY. Comparative Evaluation of the Loop-  
362 Mediated Isothermal Amplification Assay for Detecting Pulmonary Tuberculosis. *Ann Lab*  
363 *Med.* 2018;38: 119–124. doi:10.3343/alm.2018.38.2.119
- 364 5. Eddabra R, Ait Benhassou H. Rapid molecular assays for detection of tuberculosis. *Pneumonia.*  
365 2018;10. doi:10.1186/s41479-018-0049-2
- 366 6. Shete PB, Farr K, Strnad L, Gray CM, Cattamanchi A. Diagnostic accuracy of TB-LAMP for  
367 pulmonary tuberculosis: a systematic review and meta-analysis. *BMC Infect Dis.* 2019;19: 268.  
368 doi:10.1186/s12879-019-3881-y
- 369 7. Notomi T, Okayama H, Masubuchi H, Yonekawa T, Watanabe K, Amino N, et al. Loop-  
370 mediated isothermal amplification of DNA. *Nucleic Acids Res.* 2000;28: e63.
- 371 8. Yan L, Xiao H, Zhang Q. Systematic review: Comparison of Xpert MTB/RIF, LAMP and SAT  
372 methods for the diagnosis of pulmonary tuberculosis. *Tuberc Edinb Scotl.* 2016;96: 75–86.  
373 doi:10.1016/j.tube.2015.11.005

- 374 9. The Use of Loop-Mediated Isothermal Amplification (TB-LAMP) for the Diagnosis of  
375 Pulmonary Tuberculosis: Policy Guidance. Geneva: World Health Organization; 2016.  
376 Available: <http://www.ncbi.nlm.nih.gov/books/NBK384520/>
- 377 10. Sohn H, Puri L, Nguyen NAT, Van't Hoog AH, Nguyen VAT, Nliwasa M, et al. Cost and  
378 affordability analysis of TB-LAMP and Xpert MTB/RIF assays as routine diagnostic tests in  
379 peripheral laboratories in Malawi and Vietnam. *J Glob Health Sci.* 2019;1: e22.  
380 doi:10.35500/jghs.2019.1.e22
- 381 11. Pandey BD, Poudel A, Yoda T, Tamaru A, Oda N, Fukushima Y, et al. Development of an in-  
382 house loop-mediated isothermal amplification (LAMP) assay for detection of *Mycobacterium*  
383 tuberculosis and evaluation in sputum samples of Nepalese patients. *J Med Microbiol.* 2008;57:  
384 439–443. doi:10.1099/jmm.0.47499-0
- 385 12. George G, Mony P, Kenneth J. Comparison of the Efficacies of Loop-Mediated Isothermal  
386 Amplification, Fluorescence Smear Microscopy and Culture for the Diagnosis of Tuberculosis.  
387 *PLoS ONE.* 2011;6. doi:10.1371/journal.pone.0021007
- 388 13. Rudeeaneksin J, Bunchoo S, Srisungngam S, Sawanpanyalert P, Chamnangrom S, Kamolwat A,  
389 et al. Rapid identification of *Mycobacterium tuberculosis* in BACTEC MGIT960 cultures by in-  
390 house loop-mediated isothermal amplification. *Jpn J Infect Dis.* 2012;65: 306–311.  
391 doi:10.7883/yoken.65.306
- 392 14. Nagai K, Horita N, Yamamoto M, Tsukahara T, Nagakura H, Tashiro K, et al. Diagnostic test  
393 accuracy of loop-mediated isothermal amplification assay for *Mycobacterium tuberculosis*:  
394 systematic review and meta-analysis. *Sci Rep.* 2016;6: 39090. doi:10.1038/srep39090
- 395 15. Phetsuksiri B, Rudeeaneksin J, Srisungngam S, Bunchoo S, Klayut W, Nakajima C, et al.  
396 Comparison of Loop-Mediated Isothermal Amplification, Microscopy, Culture, and PCR for  
397 Diagnosis of Pulmonary Tuberculosis. *Jpn J Infect Dis.* 2020;advpub.  
398 doi:10.7883/yoken.JJID.2019.335

- 399 16. Kent PT. *Public Health Mycobacteriology: A Guide for the Level III Laboratory*. U.S.  
400 Department of Health and Human Services, Public Health Service, Centers for Disease Control;  
401 1985.
- 402 17. Phetsuksiri B, Rudeeaneksin J, Srisungngam S, Bunchoo S, Roienthong D, Mukai T, et al.  
403 Applicability of in-house loop-mediated isothermal amplification for rapid identification of  
404 *Mycobacterium tuberculosis* complex grown on solid media. *Jpn J Infect Dis*. 2013;66: 249–  
405 251. doi:10.7883/yoken.66.249
- 406 18. Rudeeaneksin J. Rapid Detection of *Mycobacterium Tuberculosis* Complex in Sputum and in  
407 Culture Growth by LAMP Test. *J Health Sci - วารสารวิชาการสาธารณสุข*. 2017;19: 300–310.
- 408 19. Rafati A, Gill P. Microfluidic method for rapid turbidimetric detection of the DNA of  
409 *Mycobacterium tuberculosis* using loop-mediated isothermal amplification in capillary tubes.  
410 *Microchim Acta*. 2015;182: 523–530. doi:10.1007/s00604-014-1354-y
- 411 20. Poudel A, Pandey BD, Lekhak B, Rijal B, Sapkota BR, Suzuki Y. Clinical profiling and use of  
412 loop-mediated isothermal amplification assay for rapid detection of *Mycobacterium tuberculosis*  
413 from sputum. *Kathmandu Univ Med J KUMJ*. 2009;7: 109–114. doi:10.3126/kumj.v7i2.2701
- 414 21. Sethi SK, Singh S, Dhatwalia SK, Yadav R, Mewara A, Singh M, et al. Evaluation of In- House  
415 Loop- Mediated Isothermal Amplification (LAMP) Assay for Rapid Diagnosis of *M.*  
416 *tuberculosis* in Pulmonary Specimens. *J Clin Lab Anal*. 2013;27: 272–276.  
417 doi:10.1002/jcla.21596
- 418 22. Li Y, Shi L, Pan A, Cao W, Chen X, Meng H, et al. Evaluation of real-time loop-mediated  
419 isothermal amplification (RealAmp) for rapid detection of *Mycobacterium tuberculosis* from  
420 sputum samples. *J Microbiol Methods*. 2014;104: 55–58. doi:10.1016/j.mimet.2014.06.011
- 421 23. Lee M-F, Chen Y-H, Peng C-F. Evaluation of reverse transcription loop-mediated isothermal  
422 amplification in conjunction with ELISA-hybridization assay for molecular detection of

- 423 *Mycobacterium tuberculosis*. J Microbiol Methods. 2009;76: 174–180.  
424 doi:10.1016/j.mimet.2008.10.005
- 425 24. Kohan L, Shahhosseiny MH, Razavi MR, Parivar K, Moslemi E, Werngren J. Evaluation of  
426 loop mediated isothermal amplification for diagnosis of *Mycobacterium tuberculosis* complex in  
427 clinical samples. Afr J Biotechnol. 2011;10: 5096–5101. doi:10.4314/ajb.v10i26.
- 428 25. Habeenzu C, Nakajima C, Solo E, Bwalya P, Kajino K, Miller M, et al. Evaluation of in-house  
429 loop-mediated isothermal amplification for tuberculosis diagnosis compared with Xpert  
430 MTB/RIF. J Infect Dev Ctries. 2017;11: 440–444. doi:10.3855/jidc.7730
- 431 26. Pandey BD, Poudel A, Yoda T, Tamaru A, Oda N, Fukushima Y, et al. Development of an in-  
432 house loop-mediated isothermal amplification (LAMP) assay for detection of *Mycobacterium*  
433 *tuberculosis* and evaluation in sputum samples of Nepalese patients. J Med Microbiol. 2008;57:  
434 439–443. doi:10.1099/jmm.0.47499-0
- 435 27. Pathak D, Chakravorty S, Hanif M, Tyagi JS. Lysis of tubercle bacilli in fresh and stored  
436 sputum specimens: implications for diagnosing tuberculosis in stored and paucibacillary  
437 specimens by PCR. BMC Microbiol. 2007;7: 83. doi:10.1186/1471-2180-7-83
- 438 28. Shea YR, Davis JL, Huang L, Kovacs JA, Masur H, Mulindwa F, et al. High Sensitivity and  
439 Specificity of Acid-Fast Microscopy for Diagnosis of Pulmonary Tuberculosis in an African  
440 Population with a High Prevalence of Human Immunodeficiency Virus. J Clin Microbiol.  
441 2009;47: 1553–1555. doi:10.1128/JCM.00348-09
- 442 29. Pham TH, Peter J, Mello FCQ, Parraga T, Lan NTN, Nabeta P, et al. Performance of the TB-  
443 LAMP diagnostic assay in reference laboratories: Results from a multicentre study. Int J Infect  
444 Dis IJID Off Publ Int Soc Infect Dis. 2018;68: 44–49. doi:10.1016/j.ijid.2018.01.005
- 445 30. Gray CM, Katamba A, Narang P, Giraldo J, Zamudio C, Joloba M, et al. Feasibility and  
446 Operational Performance of Tuberculosis Detection by Loop-Mediated Isothermal

- 447 Amplification Platform in Decentralized Settings: Results from a Multicenter Study. *J Clin*  
448 *Microbiol.* 2016;54: 1984–1991. doi:10.1128/JCM.03036-15
- 449 31. Pai M, Flores LL, Pai N, Hubbard A, Riley LW, Colford JM. Diagnostic accuracy of nucleic  
450 acid amplification tests for tuberculous meningitis: a systematic review and meta-analysis.  
451 *Lancet Infect Dis.* 2003;3: 633–643. doi:10.1016/s1473-3099(03)00772-2
- 452 32. Shi J, Dong W, Ma Y, Liang Q, Shang Y, Wang F, et al. GeneXpert MTB/RIF Outperforms  
453 Mycobacterial Culture in Detecting Mycobacterium tuberculosis from Salivary Sputum. In:  
454 *BioMed Research International* [Internet]. 2018 [cited 12 Dec 2019]. Available:  
455 <https://www.hindawi.com/journals/bmri/2018/1514381/>
- 456 33. Ho J, Marks GB, Fox GJ. The impact of sputum quality on tuberculosis diagnosis: a systematic  
457 review. *Int J Tuberc Lung Dis Off J Int Union Tuberc Lung Dis.* 2015;19: 537–544.  
458 doi:10.5588/ijtld.14.0798
- 459 34. Yoon SH, Lee NK, Yim JJ. Impact of sputum gross appearance and volume on smear positivity  
460 of pulmonary tuberculosis: a prospective cohort study. *BMC Infect Dis.* 2012;12: 172.  
461 doi:10.1186/1471-2334-12-172
- 462 35. Hirooka T, Higuchi T, Tanaka N, Ogura T. [The value of proper sputum collection instruction in  
463 detection of acid-fast bacillus]. *Kekkaku.* 2004;79: 33–37.
- 464 36. Sicsú AN, Salem JI, Fujimoto LBM, Gonzales RIC, Cardoso M do S de L, Palha PF.  
465 Educational intervention for collecting sputum for tuberculosis: a quasi-experimental study 1.  
466 *Rev Lat Am Enfermagem.* 2016;24. doi:10.1590/1518-8345.0363.2703
- 467 37. Cudahy P, Shenoi S. Diagnostics for pulmonary tuberculosis. *Postgrad Med J.* 2016;92: 187–  
468 193. doi:10.1136/postgradmedj-2015-133278

469 38. Kadioglu EE, Ucar EY, Araz O, Aktas E, Saglam L. A Comparison of Two Different Culture  
470 Methods for Use in the Diagnosis of Pulmonary Tuberculosis. *Eurasian J Med.* 2014;46: 74–77.  
471 doi:10.5152/eajm.2014.19

472 39. Kaku T, Minamoto F, D’Meza R, Morose W, Boncy J, Bijou J, et al. Accuracy of LAMP-TB  
473 Method for Diagnosing Tuberculosis in Haiti. *Jpn J Infect Dis.* 2016;69: 488–492.  
474 doi:10.7883/yoken.JJID.2015.519

475

476



477 **Supporting information**

478 **S1 Table. Review on diagnostic accuracy of in-house LAMP assays for diagnosis of**  
479 **pulmonary tuberculosis (DOCX)**

480 **S2 Table. LAMP minimal dataset (CSV)**

481

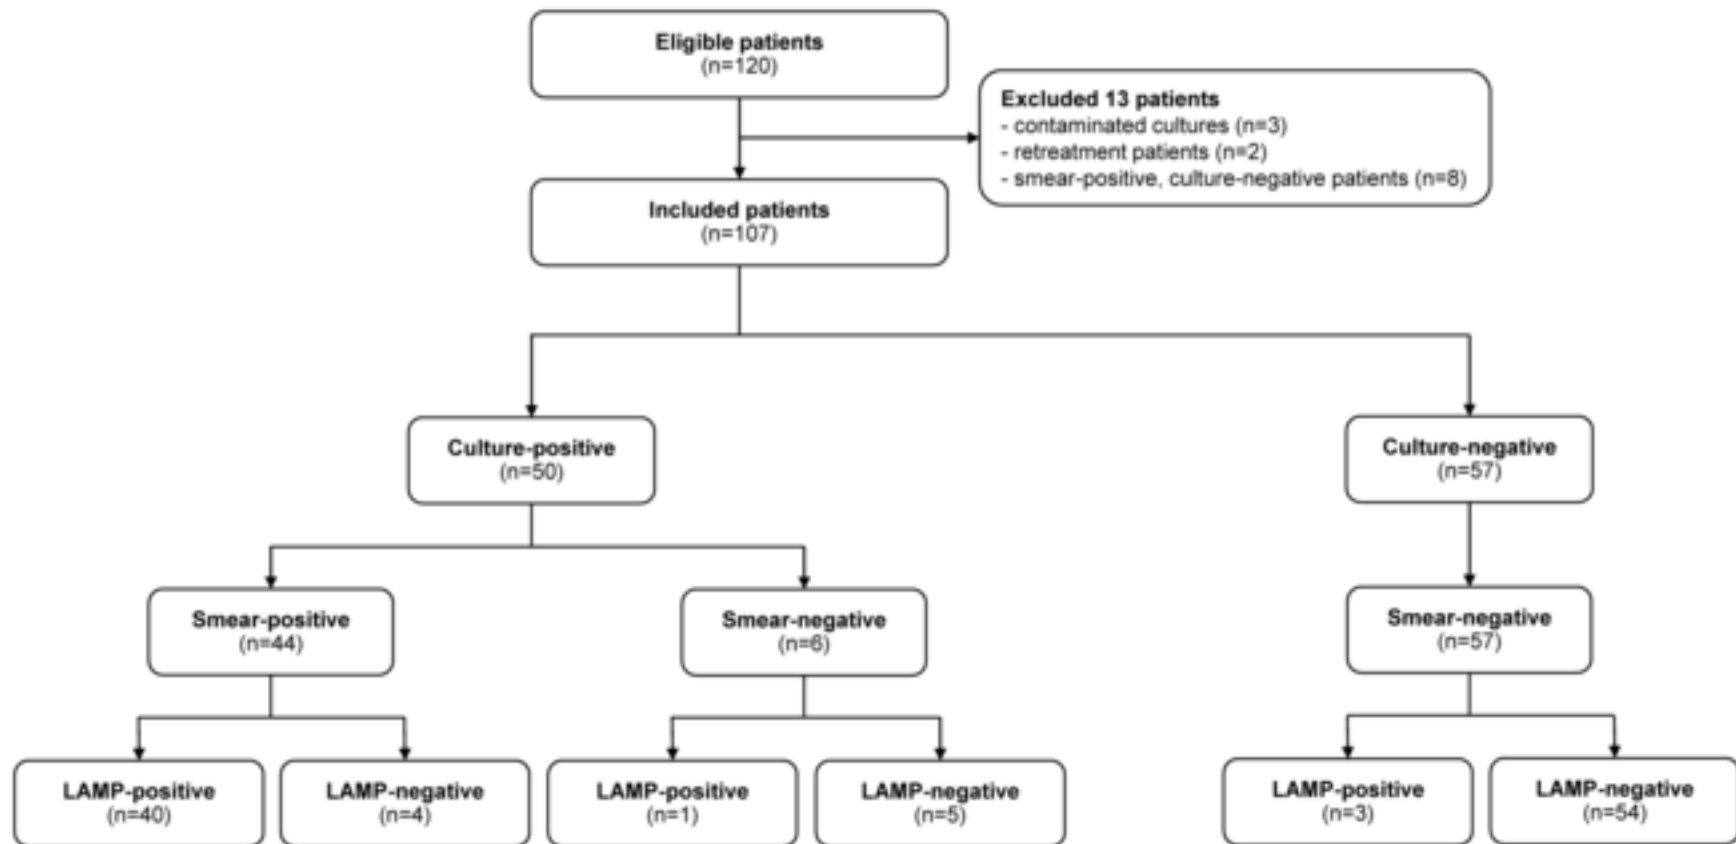

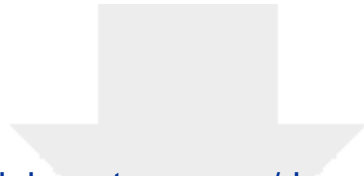

Click here to access/download  
**Supporting Information**  
S2 LAMP dataset.csv

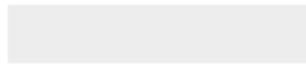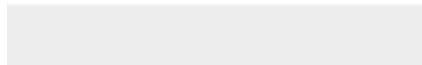



Click here to access/download  
**Supporting Information**  
Table S1.docx

1 **Pragmatic accuracy of in-house of loop-mediated isothermal amplification**  
2 **(LAMP)**  
3 **for diagnosis of pulmonary tuberculosis in a Thai community hospital**

Formatted: Line spacing: Double

4  
5 **Short title:** Diagnostic accuracy of in-house LAMP for pulmonary TB

6  
7 Sarawut Toonkomdang<sup>1</sup>, Phichayut Phinyo<sup>2,3\*</sup>, Benjawan Phetsuksiri<sup>4</sup>,  
8 Jayanton Patumanond<sup>3</sup>, Janisara Rudeeaneksin<sup>4†</sup>, Wiphat Klayut<sup>4†</sup>

9  
10 <sup>1</sup> Department of Medical Technology, Maesot General Hospital, Tak, Thailand.

Formatted: Line spacing: Double

11 <sup>2</sup>Department of Family Medicine, Faculty of Medicine, Chiang Mai University, Chiang Mai,  
12 Thailand.

Formatted: No underline

13 <sup>3</sup> Center for Clinical Epidemiology and Clinical Statistics, Faculty of Medicine, Chiang Mai  
14 University, Chiang Mai, Thailand.

15 <sup>4</sup> National Institute of Health, Department of Medical Sciences, Ministry of Public Health,  
16 Nonthaburi, Thailand.

Formatted: Line spacing: Double

17  
18 \*Corresponding author:

19 E-mail: phichayutphinyo@gmail.com (PP)

20 †These authors contributed equally to this work.

21

## Abstract

**Background:** To improve the quality of diagnosing pulmonary tuberculosis (TB), WHO recommends the use of rapid molecular testing as an alternative to conventional microscopic methods. Loop-mediated isothermal amplification assay (LAMP test) is a practical and recently developed cost-effective nucleic amplification technique, with proven diagnostic performance over the past decades. However, most of the results were validated within large centers with highly skilled personnel and adequate infrastructure. We evaluated the pragmatic accuracy of the in-house LAMP assay for the diagnosis of TB in a remote health care setting where an advanced rapid molecular test is not available.

**Methods:** ~~Diagnostic accuracy research using a cross-sectional design~~ A prospective diagnostic accuracy study was conducted. ~~Clinically suspected TB patients~~ Patients with clinical symptoms suggestive of TB were consecutively included/enrolled from April to August 2016. Sputum samples were collected from each patient and were sent for microscopic examination (both acid-fast stain and fluorescence stain), in-house LAMP test, and TB culture, and LAMP test.

**Results:** One hundred and ~~fifteen~~ seven TB suspects/patients with TB symptoms were used in the final analysis. This included 50 (43.5/46.7%) culture-positive TB patients and 57/65 (53.3/36.5%) culture-negative patients. ~~The sensitivity, specificity, positive predictive value, and negative predictive value of the LAMP test compared to the reference TB culture were~~ 82.0% (68.6-91.4), 84.6% (73.5-92.4), 80.4% (66.9-90.2), and 85.9% (75.0-93.4), respectively. ~~The overall sensitivity of the in-house LAMP based on culture positivity was~~ 88.8% (95%CI 81.2-94.1). ~~The sensitivity was 90.9% (95%CI 78.3-97.5) for smear-positive, culture-positive patients, and was 16.7% (95%CI 0.4-64.1) for smear-negative, culture-~~

46 positive patients. -The overall diagnostic performance sensitivity and accuracy of the in-house  
47 LAMP test compared to direct microscopic examination and fluorescence microscopy smear  
48 microscopy methods were not significantly different (p=0.375 and p=1.000, respectively).  
49 The specificity of the in-house LAMP based on non-TB patients (smear-negative, culture-  
50 negative) was 94.7% (95%CI 85.4,98.9).-

51 **Conclusions:** The diagnostic accuracy of ~~the~~ the in-house LAMP test in a community  
52 hospital was comparable to other previous reports in terms of specificity. The sensitivity of  
53 the in-house assay could be improved with better sputum processing and DNA extraction  
54 method, comparable to the conventional smear microscopy examination for the diagnosis of  
55 TB in a remote hospital of high TB burden country. Serial testing of both tests may be  
56 suggested to improve the overall accuracy of TB diagnosis.

57  
58 **Keywords:** Pulmonary Tuberculosis, in-house LAMP, Diagnosis, Sensitivity, Specificity

59

## 60 Introduction

61 Tuberculosis (TB), an airborne communicable disease, has long been considered ~~as a~~  
62 significant threat to global public health. According to The World Health Organization  
63 (WHO), 10 million people were newly infected with TB in 2018. Although the incidence and  
64 prevalence of TB vary greatly across the globe, 87% of total cases resided within 30 countries  
65 with high TB burden, including Thailand, where the incidence rate was 153 cases per 100,000  
66 population in 2018 [1]. Early diagnosis and timely treatment is an essential component of The  
67 End TB Strategy endorsed by the WHO, aiming to end the global TB epidemic by the year  
68 2035 [2]. However, tuberculosis is still underdiagnosed and undertreated, especially in  
69 resource-limiting countries due to the lack of highly sensitive and specific diagnostic tools  
70 which are usually expensive and require adequate infrastructure [1,3]. Novel diagnostic  
71 methods with enough simplicity and cost-effectiveness are therefore necessary to improve  
72 accurate identification of tuberculosis patients in these particular settings [3,4][4,5].  
73  
74 Molecular testing methods such as polymerase chain reaction (PCR) or Xpert MTB/RIF have  
75 been widely acknowledged as alternative tools for the diagnosis of tuberculosis patients  
76 [3,5][5,6]. These nucleic amplification techniques were known for yielding rapid and accurate  
77 TB diagnosis, which would ~~clearly~~ overcome the limitations of classical methods,  
78 insensitivity for smear microscopy, and lengthy incubation period for TB culture. However,  
79 several obstacles remain for the application of these molecular tests as point-of-care testing in  
80 community settings because of their complexity in executions and substantial requirements  
81 for financial and personnel resources [3,6][3,7]. Loop-mediated isothermal amplification  
82 (LAMP) assay is another recently developed nucleic acid amplification technique. Unlike  
83 PCR, where the amplification of DNA fragment occurs in temperature-dependent steps, the  
84 reaction of LAMP assay functions in isothermal, or constant temperature, conditions

Field Code Changed

Field Code Changed

Field Code Changed

Field Code Changed

Formatted: Font: (Default) Times New Roman, 12 pt

Formatted: Font: 11 pt, Font color: Auto

Formatted: Font: (Default) Times New Roman, 12 pt

Formatted: Font: 11 pt, Font color: Auto

Field Code Changed

Field Code Changed

Formatted: Font: (Default) Times New Roman, 12 pt

Formatted: Font: 11 pt, Font color: Auto



85 ~~[7,8][8,9]. LAMP assay has a low cost per test, does not required advanced technological~~  
86 ~~facilities, and can be routinely practiced in general hospital laboratories [3].~~In 2016, WHO  
87 suggested the use of commercial TB-LAMP assay (Eiken Chemical Co., Tokyo, Japan) ~~for~~  
88 ~~the~~ as a replacement for smear microscopy for the diagnosis of pulmonary tuberculosis ~~TB in~~  
89 patients with symptoms suggestive of TB [9][40]. TB-LAMP assay has a low cost per test,  
90 does not required advanced technological facilities, and can be routinely practiced in general  
91 hospital laboratories [6,10].

Formatted: Font: (Default) Times New Roman, 12 pt

Formatted: Font: 11 pt, Font color: Auto

Field Code Changed

Field Code Changed

Field Code Changed

Formatted: Font: (Default) Times New Roman, 12 pt

Formatted: Font: 11 pt, Font color: Auto

Field Code Changed

Formatted: Font: (Default) Times New Roman, 12 pt

92  
93 As ~~health care~~ financial resources are usually limited in countries with high TB prevalence,  
94 setting up an infrastructure to support the commercial TB-LAMP could still be unattainable.  
95 A more affordable in-house LAMP was developed in 2008 [11]. The main advantage of the  
96 in-house assay was that it could be implicated on the readily-available infrastructure of any  
97 laboratory, even in the decentralized one. However, it did require extra-training and skill of  
98 technicians to process the clinical specimens. a simple and affordable molecular test would be  
99 ~~suitable for achieving accurate TB diagnosis.~~In the past decades, several clinical studies and  
100 meta-analyses had evaluated the diagnostic accuracy of the in-house LAMP test for the  
101 diagnosis of pulmonary tuberculosis [12–14][7,11–14] (S1 Table). Overall, the LAMPFrom  
102 the latest meta-analysis, the overall sensitivity and specificity of the in-house LAMP was  
103 93.0% (95%CI 88.9-95.7) and 91.8% (95%CI 86.4-95.1), respectively [14]. One recent study  
104 in Thailand reported the sensitivity and the specificity of the in-house LAMP at 94.4%  
105 (95%CI 88.9-97.7) and 94.3% (95%CI 87.2-98.1), respectively [15]. ~~assay revealed high~~  
106 ~~diagnostic performance especially in smear positive TB patients and had been suggested as~~  
107 ~~an alternative test for TB diagnosis, especially in resource limiting areas where advanced~~  
108 ~~molecular tests (e.g. PCR and Xpert MTB/RIF) are inaccessible [1,7]. However, the LAMP~~  
109 ~~procedures and types of assay used (in house or commercialized kit) varied across studies~~

Field Code Changed

Formatted: Font: (Default) Times New Roman, 12 pt

Field Code Changed

Field Code Changed

Formatted: Font: (Default) Times New Roman, 12 pt

Formatted: Font: (Default) Times New Roman, 12 pt

Field Code Changed

Field Code Changed

Formatted: Font: 11 pt, Font color: Auto

110 ~~and yielded some discrepancies in results. Moreover~~However, the reported accuracy could be  
111 overestimated if being assessed in qualified laboratories with highly skilled technicians and  
112 sufficient resources where molecular tests usually are available ~~[14][14]~~. Therefore, this study  
113 aimed to evaluate the pragmatic accuracy of the in-house LAMP assay for the diagnosis of  
114 pulmonary tuberculosis in a peripheral community hospital of a developing country with a  
115 high TB burden.

116

**Field Code Changed**

**Formatted:** Font: (Default) Times New Roman

**Formatted:** Font: 11 pt, Font color: Auto

## 117 **Materials and Methods**

118

### 119 **Ethics Statement**

120 This study was approved by the Research Ethics Committee of Maesot General Hospital, The  
121 Ministry of Public Health (serial number 37/2015) and The Human Research Ethics  
122 Committee of Thammasat University, Faculty of Medicine (COA number 081/2016). The  
123 clinical samples used in this study were collected from all patients as routinely done.  
124 Informed consent was obtained from all patients prior to inclusion.

125

### 126 **Setting**

127 The study was settled in Maesot General Hospital, a ~~large-large~~-sized community hospital  
128 with 365 in-patient beds. The hospital is located in Maesot district in Tak (province), which  
129 shares the border with Myanmar and provides standard health care to both Thai and non-Thai  
130 patients (Burmese immigrants and ethnic minorities). According to the Health Data Center,  
131 the ministry of public health, Thailand, the incidence rate of pulmonary TB in Maesot was  
132 351 per 100,000 in 2019. The level of health care system of the hospital is considered rural.  
133 Maesot hospital has its own reference laboratory with biosafety cabinet infrastructure, BSC  
134 class II. There are four lab technicians and one lab assistant within each working shift. Power  
135 generator (350 kW) and UPS (2.7 kW) were available in case of power outages, which was  
136 infrequent.

137

### 138 **Study Design**

139 This prospective diagnostic accuracy research ~~with a population analog cross-sectional~~  
140 ~~design~~ was conducted from April to August 2016. ~~New patients who were clinically~~

141 ~~suspected of pulmonary TB (coughing for more than two weeks with or without hemoptysis);~~  
142 ~~aged more than 18 years old were consecutively invited into the study regardless of nation~~  
143 ~~status. Adult patients aged more than 15 years old with symptoms indicative of pulmonary TB~~  
144 ~~(coughing for more than two weeks with or without hemoptysis) and no history of TB were~~  
145 ~~consecutively enrolled regardless of nationality status. Samples with contaminated culture~~  
146 ~~results or samples from patients who were previously documented as TB cases were~~  
147 ~~excluded. Patients with previously documented TB history or patients with two contaminated~~  
148 ~~or missing cultures were excluded from the study.~~

149

150

## 151 **Methods**

152 All patients were given three sealed containers for the collection of morning sputum  
153 specimens. Of all containers sent to the laboratory, only the one with seemingly adequate  
154 sputum containing both mucoïd or mucopurulent characters with a sample volume of more  
155 than 3 ml, was used for the whole investigation procedures as routinely done. Specimens  
156 were sent for smear microscopy with conventional AFB-acid-fast bacilli (AFB) staining with  
157 Ziehl-Neelsen technique and fluorescence acid-fast staining with Auramine O solution.  
158 Smear-positive case was defined according to WHO definitions as the presence of at least  
159 two smears of scanty grade or one or more smears of 1+ or more. A smear negative case or  
160 AFB smear-negative was conversely defined. ~~For TB culture, the reference test, we~~  
161 ~~performed both conventional culture method on L-J (Lowenstein-Jensen) medium and BBL~~  
162 ~~MGIT (mycobacterial growth indicator tube) culture method.~~

163

## 164 **Sputum decontamination and culture examination**

165 For the sputum decontamination process, the collected samples and 2% N-Acetyl-L-cysteine  
166 (NALC) NaOH were poured into a 50 ml sterile centrifuge tube in an equal proportion and  
167 were subsequently mixed by vortexing for 30 seconds and left at room temperature (20-25°C)  
168 for 15 minutes. Then, the test tubes were filled with phosphate buffer saline (pH 6.8) until the  
169 volume reached the level of 50 ml. The samples were put in a high-speed refrigerated  
170 centrifuge at 3,000 g for 20 minutes. Next, the supernatants were poured off, leaving the tube  
171 with decontaminated sputum samples. Finally, a drop (1 ml) of phosphate buffer saline (pH  
172 6.8) was used for resuspension of the specimen.

173

Formatted: Space After: 8 pt, Line spacing: Double

Formatted: Line spacing: Double

174 For TB culture, the reference test, we performed both conventional culture method on L-J  
175 (Lowenstein-Jensen) medium and BBL MGIT 960 (mycobacterial growth indicator tube)  
176 culture method. The cCulture media were inoculated with processed sputum specimens and  
177 incubated at 35 to 37°C and monitored weekly for growth until 8 weeks. The sputum samples  
178 were considered as “culture-positive” if growth was detected in either of L-J or MGIT  
179 culture, regardless of the smear status. If growth was not detected in neither of the culture  
180 methods and both microscopy results were negative, the samples were considered as “culture-  
181 negative” or “non-TB patients”. Patients with smear-positive and culture-negative, which  
182 were generally considered as probable TB, were excluded from the analysis. Both smear  
183 microscopy and culture methods were performed according to the standard protocols [16][15].

Formatted: Font: (Default) Times New Roman

Field Code Changed

Formatted: Font: 11 pt

### 185 **In-house LAMP test**

186 The LAMP test consists of three steps as follows: DNA extraction, isothermal amplification,  
187 and visual interpretation with fluorescence. The National Institute of Health of Thailand had  
188 developed the TB Fast Amp technique (a modified LAMP procedure) to suite local practice  
189 since 2009. The procedures were described as follow. Flexi Gene® DNA Kit (Qiagen co.,  
190 USA) and Protenase K Kit (Qiagen co., USA) were used for DNA extraction [17,18][16,17].  
191 Four primers (MTB primers, MAV primers, MIN primers, and Muniv primers) were used for  
192 the recognition of six distinct regions on the 16S ribosomal RNA gene of *M. tuberculosis*.  
193 Each single LAMP reaction includes 12 µl of TB-Fast AMP mixture (FastAMP master mix  
194 includes 2 µl 10Xbuffer, 4 µl 2mM dNTPs, 3.2 µl 5M betaine, 1.2 µl 100 mM MgSO<sub>4</sub>, 1.6 µl  
195 primer mixture), 1 µl *Bst* DNA polymerase enzyme, 1 µl fluorescent detection reagent and 6  
196 µl of extracted DNA samples. Amplification of reaction mixture was performed in the  
197 heating blocks at 65°C for 60 minutes, then examined directly by visual observation. The  
198 LAMP assay was considered “positive” if the color of the reaction mixture changed from

Field Code Changed

Formatted: Font: (Default) Times New Roman

Formatted: Font: 11 pt

199 orange to green or fluorescence was directly observed with the naked eyes. The test was  
200 considered “negative” if the color of the mixture remained unchanged. For quality control,  
201 positive control (test tube with *M. tuberculosis* genetic materials) and negative control (test  
202 tube without *M. tuberculosis* genetic materials) were included in all runs.

203  
204

### 205 **Study size estimation**

206 ~~Pandey et al. reported the sensitivity and specificity of in-house LAMP assay for MTB  
207 detection at 97% and 94%, respectively [18]. Based on the hypothesis that the sensitivity of  
208 the LAMP test in this study would not differ from that previously reported by more than  
209 10%, the study size was estimated (using one-sample comparison of proportion to  
210 hypothesized value), yielding a total number of 60 culture-positive TB cases. From a  
211 retrospective review of Maesot General Hospital data, the prevalence of culture-positive TB  
212 cases was 50% of all patients who were TB suspects. A total of 120 patients were therefore  
213 planned to be included in our study.~~

214

### 215 **Statistical Analysis**

216 ~~Frequency and percentage were used for the description of categorical data. For continuous  
217 data, visualization of data distribution was done with histogram. For normally distributed  
218 data, mean and standard deviation was reported. For non-normally distributed data, median  
219 and interquartile range was reported.~~ We used Fisher’s exact probability test for comparison  
220 of differences in independent proportions and Student’s t-test for two independent means.  
221 The sensitivity, specificity, positive predictive values (PPV), negative predictive values  
222 (NPV), and positive and negative likelihood ratios (LHR+) ~~of all testing methods~~ were  
223 calculated and reported with its 95% confidence interval. The 95% confidence interval were

Field Code Changed

224 estimated using the Clopper Pearson binomial exact method. The comparison of sensitivity,  
225 specificity, and overall test accuracy between the LAMP test and smear microscopy methods  
226 was performed with McNemar's exact probability test. Pairwise testing to compare the  
227 specificity between the LAMP test and the smear microscopy methods was not performed as  
228 the specificity of the latter was affected by incorporation bias and would not be comparable  
229 to the in-house LAMP. The agreement of the LAMP test with smear microscopy methods  
230 was analyzed with Kappa's statistics and ~~Kappa statistics~~ Spearman's rank correlation. ~~The~~  
231 ~~subgroup analysis of LAMP test accuracy in smear negative, culture positive TB patients was~~  
232 ~~pre-specified.~~ P-values of less than 0.05 were considered statistically significant. All  
233 statistical analyses were done using Stata version 16 (StataCorp, Texas).

234



## Results

A total of 120 ~~clinically suspected cases of TB patients to be evaluated for TB~~ were consecutively included from April to August 2016. Three patients with ~~two~~ contaminated cultures, ~~and two~~ ~~patients~~ who subsequently were detected as previously documented TB cases, ~~and eight patients who had smear-positive and culture-positive results~~ were excluded from the analysis; only ~~115-107 samples-patients~~ remained in the study (Fig. 1). Most of the included patients were male (60% vs. 40%) with a mean age of 47 years old. Fifty ~~(43-46.75%)~~ were culture-positive TB patients and ~~65-57 (56.553.3%)~~ were culture-negative patients. The baseline demographic data between culture-positive and ~~culture~~-negative patients were comparable. ~~-For clinical characteristics, except for~~ the presence of cavitary lesions on chest radiographs and the character of collected sputum ~~was found to be significantly different~~ (Table 1). Culture-positive TB patients had higher proportion of cavitary lesions (14.0% vs. 1.58%,  $p=0.020024$ ) and mucous sputum specimen (52.0% vs 24.6%,  $p=0.003005$ ) than patients with negative TB culture.

250

251

**Table 1. Baseline clinical characteristics of the patients by culture status**

| Characteristics            | TB Culture Positive | TB Culture Negative | P-Value |
|----------------------------|---------------------|---------------------|---------|
|                            | n=50 (43.5%)        | n=65 (56.5%)        |         |
| <b>Gender</b>              |                     |                     |         |
| Male                       | 30(60.0)            | 39(60.0)            | 1.000   |
| Female                     | 20(40.0)            | 26(40.0)            |         |
| <b>Nationality</b>         |                     |                     |         |
| Thai                       | 22(44.0)            | 38(58.5)            | 0.136   |
| Non-Thai                   | 28(56.0)            | 27(41.5)            |         |
| Age (year, mean±SD)        | 48.7±17.4           | 45.6±18.5           | 0.362   |
| <b>Chest radiographs</b>   |                     |                     |         |
| without cavitary lesions   | 43(86.0)            | 64(98.5)            | 0.020   |
| with cavitary lesions      | 7(14.0)             | 1(1.5)              |         |
| <b>Character of sputum</b> |                     |                     |         |
| Salivary                   | 24(48.0)            | 49(75.4)            | 0.003   |
| Mucous                     | 26(52.0)            | 16(24.6)            |         |

252

**Table 1. Demographic and clinical characteristics of the patients by TB culture status**

| Characteristics     | TB Culture Positive | TB Culture Negative | P-Value |
|---------------------|---------------------|---------------------|---------|
|                     | (S+ or S-, C+)      | (S-, C-)            |         |
|                     | n=50 (46.7%)        | n=57 (53.3%)        |         |
| <b>Gender</b>       |                     |                     |         |
| Male                | 30 (60.0)           | 36 (63.2)           | 0.842   |
| Female              | 20 (40.0)           | 21 (36.8)           |         |
| <b>Nationality</b>  |                     |                     |         |
| Thai                | 28 (56.0)           | 21 (36.8)           | 0.054   |
| Non-Thai            | 22 (44.0)           | 36 (63.2)           |         |
| Age (year, mean±SD) | 48.7±17.4           | 45.8±18.7           | 0.408   |

Formatted: Line spacing: Double

Formatted: Font: 12 pt

Formatted: Line spacing: Double

Formatted: Font: 12 pt

Formatted: Line spacing: Double

Chest radiographs

|                                  |           |           |
|----------------------------------|-----------|-----------|
| <u>W</u> ithout cavitary lesions | 43 (86.0) | 56 (98.2) |
| <u>W</u> ith cavitary lesions    | 7 (14.0)  | 1 (1.8)   |

$p=0.024$

Character of sputum

|                 |           |           |
|-----------------|-----------|-----------|
| <u>Salivary</u> | 24(48.0)  | 43 (75.4) |
| <u>Mucous</u>   | 26 (52.0) | 14 (24.6) |

0.005

253 Abbreviations: TB, tuberculosis; C, culture (+ positive or – negative); S, smear microscopy (+ positive or – negative); SD,  
254 standard deviation.

255 ~~Abbreviations: TB, tuberculosis; SD, standard deviation.~~

256

257 **Fig. 1. Study flow diagram of patient enrollment and results of index and reference test**  
258 **based on ~~conventional smear microscopy~~ culture result**

259

260

Formatted: Line spacing: Double

261 The overall sensitivity of the LAMP test was 82.0% (95%CI 68.6-91.4), whereas the  
262 sensitivity in smear-positive, culture-positive patients and smear-negative, culture-positive  
263 was 90.9% (95%CI 78.3-97.5) and 16.7% (95%CI 0.4-64.1), respectively. The overall  
264 sensitivity of both the AFB and the fluorescence stain was slightly higher than that of the  
265 LAMP test; however, the differences were non-significant (Table 2). The sensitivity,  
266 specificity, positive predictive value, and negative predictive value of LAMP test compared  
267 to the reference TB culture were 82.0% (68.6-91.4), 84.694.7% (95%CI 73.5-92.485.4-  
268 98.9), 80.493.2% (95%CI 66.9-90.281.3-98.6), and 85.985.7% (95%CI 75.0-93.474.6-93.3),  
269 respectively. The diagnostic accuracy of both the AFB and the fluorescence stain was slightly  
270 higher than that of the LAMP test; however, the differences were non-significant (Table 2).  
271 The positive and negative likelihood ratios of the LAMP test was 15.6 (95%CI 4.47-82.12)  
272 and 0.19 (95%CI 0.08-0.44), respectively all tests were depicted in table 2. Even though the  
273 accuracy measures for the diagnosis of tuberculosis cases were shown to vary across different  
274 test methods (LAMP test, AFB stain, and fluorescence stain), the differences were without  
275 statistical significance (Table 2).  
276 LAMP test results showed substantial to almost perfect agreement were highly correlated with  
277 both those of AFB (Kappa 0.82, 95%CI: 0.64-1.01, p<0.001) and fluorescence stain (Kappa 0.84;  
278 95%CI: 0.66-1.03, p<0.001) Spearman's rho 0.85, p<0.001) in the diagnosis of culture-positive TB  
279 cases (Table 3). The in-house LAMP also showed substantial to almost perfect agreement  
280 with both microscopy methods in the diagnosis of culture-positive cases (Kappa 0.85, 95%CI  
281 0.74,0.95) (Table 3).

Formatted: Line spacing: Double

283 **Table 2. Diagnostic accuracy of LAMP test, AFB stain, Fluorescence stain, parallel and**  
 284 **serial testing of LAMP test and AFB stain.**

|                                       | TB-Culture |          |         | Sensitivity<br>% | Specificity<br>% | PPV %<br>(95%CI) | NPV %<br>(95%CI) | LHR+<br>(95%CI) |
|---------------------------------------|------------|----------|---------|------------------|------------------|------------------|------------------|-----------------|
|                                       | Positive   | Negative | Total   |                  |                  |                  |                  |                 |
|                                       | (n=50)     | (n=65)   | (n=115) |                  |                  |                  |                  |                 |
| <b>LAMP-Test</b>                      |            |          |         |                  |                  |                  |                  |                 |
| Positive                              | 41         | 10       | 51      | 82.0             | 84.6             | 80.4             | 85.9             | 5.3             |
| Negative                              | 9          | 55       | 64      | (68.6-91.4)      | (73.5-92.4)      | (66.9-90.2)      | (75.0-93.4)      | (3.0-9.6)       |
| <b>AFB-stain</b>                      |            |          |         |                  |                  |                  |                  |                 |
| Positive                              | 44         | 7        | 51      | 88.0             | 89.2             | 86.3             | 90.6             | 8.2             |
| Negative                              | 6          | 58       | 64      | (75.7-95.5)      | (79.1-95.6)      | (73.7-94.3)      | (80.7-96.5)      | (4.0-16.6)      |
| <b>Fluorescence-stain</b>             |            |          |         |                  |                  |                  |                  |                 |
| Positive                              | 44         | 8        | 52      | 88.0             | 87.7             | 84.6             | 90.5             | 7.2             |
| Negative                              | 6          | 57       | 63      | (75.7-95.5)      | (77.2-94.5)      | (71.9-93.1)      | (80.4-96.4)      | (3.7-13.8)      |
| <b>Parallel testing (LAMP or AFB)</b> |            |          |         |                  |                  |                  |                  |                 |
| Positive                              | 45         | 11       | 56      | 90.0             | 83.1             | 80.4             | 91.5             | 5.3             |
| Negative                              | 5          | 55       | 59      | (78.2-96.7)      | (71.7-91.2)      | (67.6-89.9)      | (81.3-97.2)      | (3.1-9.2)       |
| <b>Serial testing (LAMP and AFB)</b>  |            |          |         |                  |                  |                  |                  |                 |
| Positive                              | 40         | 6        | 46      | 80.0             | 90.8             | 87.0             | 85.5             | 8.67            |
| Negative                              | 10         | 59       | 69      | (66.3-90.0)      | (81.0-96.5)      | (73.7-95.1)      | (75.0-92.8)      | (3.99-18.8)     |
| P-value                               |            |          |         | 0.594            | 0.702            | 0.840            | 0.738            |                 |

285 **Table 2. Diagnostic accuracy of the in-house LAMP test, AFB stain, and Fluorescence**  
 286 **stain.**

| Method | Sensitivity% (95% CI), no. corrects | Specificity% (95%CI), no. corrects | Accuracy% (95%CI), no. corrects | PPV% (95%CI) | NPV (95%CI) | LR+ (95%CI) | LR- (95%CI) |
|--------|-------------------------------------|------------------------------------|---------------------------------|--------------|-------------|-------------|-------------|
|        |                                     |                                    |                                 |              |             |             |             |

Formatted: Line spacing: Double

Formatted: Font: 12 pt

Formatted: Line spacing: Double

Formatted: Font: 12 pt

Formatted: Font: 12 pt

Formatted: Font: 12 pt

|                                     | S+, C+<br>(n=44)    | S-, C+<br>(n=6)    | Any S, C+<br>(n=50) | S-, C-<br>(n=57)      | (n=107)             |                       |                     |                    |                  |
|-------------------------------------|---------------------|--------------------|---------------------|-----------------------|---------------------|-----------------------|---------------------|--------------------|------------------|
| LAMP                                | 90.9<br>(78.3,97.5) | 16.7<br>(0.4,64.1) | 82.0<br>(68.6,91.4) | 94.7<br>(85.4,98.9)   | 88.8<br>(81.2,94.1) | 93.2<br>(81.3,98.6)   | 85.7<br>(74.6,93.3) | 15.6<br>(4.5,82.1) | 0.2<br>(0.1,0.4) |
|                                     | N=40                | n=1                | n=41                | n=54                  | n=95                |                       |                     |                    |                  |
| AFB stain                           | -                   | -                  | 88.0<br>(75.7,95.5) | 100.0<br>(93.7,100.0) | 94.4<br>(88.2,97.9) | 100.0<br>(93.7,100.0) | 90.5<br>(80.4,96.4) | -                  |                  |
|                                     |                     |                    | n=44                | n=57                  | n=101               |                       |                     |                    |                  |
| Fluorescence stain                  | -                   | -                  | 88.0<br>(75.7,95.5) | 100.0<br>(93.7,100.0) | 94.4<br>(88.2,97.9) | 100.0<br>(93.7,100.0) | 90.5<br>(80.4,96.4) | -                  |                  |
|                                     |                     |                    | n=44                | n=57                  | n=101               |                       |                     |                    |                  |
| LAMP test vs.<br>AFB stain          |                     |                    | P=0.375*            | P=0.250*              | P=1.000*            |                       |                     |                    |                  |
| LAMP test vs.<br>Fluorescence stain |                     |                    | P=0.375*            | P=0.250*              | P=1.000*            |                       |                     |                    |                  |

Formatted: Line spacing: Double

287 \*P-values from McNemar's Exact probability test

Formatted: Line spacing: Double

288 Abbreviations: AFB, acid fast bacilli; C, culture (+ positive or - negative); CI, confidence interval; LAMP, loop-mediated

289 isothermal amplification; LR+, positive likelihood ratio; LR-, negative likelihood ratio; no, correct, number correctly

290 identified; NPV, negative predictive value; PPV, positive predictive value; S, smear microscopy (+ positive or - negative).

291

292 **Table 3. Diagnostic agreement and correlation between the in-house LAMP test and**  
 293 **AFB stain-fluorescence stain.**

| LAMP Test                | AFB Stain & Fluorescence stain |          |       |
|--------------------------|--------------------------------|----------|-------|
|                          | Positive                       | Negative | Total |
| Positive                 | 40                             | 4        | 44    |
| Negative                 | 4                              | 59       | 63    |
| Total                    | 44                             | 63       | 107   |
| Agreement (%)            | 92.5%                          |          |       |
| Kappa (95%CI, p-value)   | 0.85 (0.74,0.95, p<0.001)      |          |       |
| Spearman's rho (p-value) | 0.85 (p<0.001)                 |          |       |

294 Abbreviations: LAMP, loop-mediated isothermal amplification; CI, confidence interval.

295  
 296 Abbreviations: TB, tuberculosis; PPV, positive predictive value; NPV, negative predictive  
 297 value; LHR+, positive likelihood ratio; CI, confidence interval; LAMP, loop-mediated  
 298 isothermal amplification; AFB, acid fast bacilli.

300 **Table 3. Diagnostic agreement between LAMP test and AFB stain-fluorescence stain.**

| LAMP Test     | AFB Stain        |          |       | Fluorescence stain |          |       |
|---------------|------------------|----------|-------|--------------------|----------|-------|
|               | Positive         | Negative | Total | Positive           | Negative | Total |
| Positive      | 46               | 5        | 51    | 47                 | 4        | 51    |
| Negative      | 5                | 59       | 64    | 5                  | 59       | 64    |
| Total         | 51               | 64       | 115   | 52                 | 63       | 115   |
| Agreement (%) | 91.3             |          |       | 92.2               |          |       |
| Kappa (95%CI) | 0.82 (0.72-0.93) |          |       | 0.84 (0.74-0.94)   |          |       |
| P-value       | <0.001           |          |       | <0.001             |          |       |

301 Abbreviations: LAMP, loop-mediated isothermal amplification; CI, confidence interval.

Formatted: Font: 12 pt

Formatted: Font: 12 pt

Formatted: Line spacing: Double

Formatted: Font: 12 pt

Formatted: Line spacing: Double

Formatted: Line spacing: Double

Formatted: Line spacing: Double

Formatted Table

Formatted: Line spacing: Double

Formatted: Line spacing: Double

Formatted: Line spacing: Double

Formatted: Line spacing: Double

302

303 ~~When parallel testing of LAMP and AFB stain was done, the sensitivity raised to 90.0%~~  
304 ~~(78.2-96.7) while the specificity dropped to 83.1% (71.7-91.2). Serial testing of LAMP and~~  
305 ~~AFB stain yielded higher specificity at 90.8% (81.0-96.5) with relatively lower sensitivity at~~  
306 ~~80.0% (66.3-90.0). Even though the accuracy measures for the diagnosis of tuberculosis cases~~  
307 ~~were shown to vary across different test methods (LAMP test, AFB stain, fluorescence stain,~~  
308 ~~parallel testing and serial testing of both LAMP and AFB stain), the differences were without~~  
309 ~~statistical significance (Table 2).~~

310



311 Of 50 culture positive TB cases, six were smear negative. The sensitivity, specificity,  
312 positive predictive value, and negative predictive value of LAMP test in smear negative,  
313 culture positive TB patients was 16.7% (0.4-64.1), 93.1% (83.3-98.1), 20.0% (0.5-71.6), and  
314 91.5% (81.3-97.2), respectively. In smear positive, culture positive TB patients, the  
315 sensitivity, specificity, positive predictive value, and negative predictive value of LAMP test  
316 was 90.9% (78.3-97.5), 84.5% (74.0-92.0), 78.4% (64.7-88.7), and 93.8% (84.8-98.3),  
317 respectively.

## 319 Discussion

320 This study had demonstrated the pragmatic ~~diagnostic performance~~ performance of the in-  
321 house LAMP test assay in a remote hospital of a high TB burden country. It was revealed that  
322 ~~the overall sensitivity of the in-house LAMP in our study was lower than the numbers~~  
323 ~~reported in the majority of the previous in-house LAMP studies. Nonetheless, the specificity~~  
324 ~~was comparable to other figures reported in the literature. In comparison to microscopy~~  
325 ~~methods, the AFB and fluorescence stain, the in-house LAMP, which was found to be~~  
326 ~~comparable-inferior to that of the conventional smear microscopy and the fluorescence~~  
327 ~~microscopy in terms of overall sensitivity (82.0% vs. 88.0%, p=0.375) and accuracy (88.8%~~  
328 ~~vs. 94.4%, p=1.000-); however, Although the sensitivity and specificity of the LAMP test~~  
329 ~~were lower than that of the acid fast stain and the fluorescence stain, the comparative~~  
330 statistical test revealed non-significant results. ~~Based on the result of our study, we suggest~~  
331 ~~that the in-house LAMP should not be a substitute to conventional smear methods, but should~~  
332 ~~be done in parallel, which Using the LAMP test and the acid fast stain in parallel might~~  
333 ~~increase the sensitivity but lower the specificity in the diagnosis of tuberculosis patients. For~~  
334 ~~screening purposes, parallel testing with high sensitivity would result in a higher sensitivity~~

335 ~~with fewer false-negative TB cases. However, the relative reduction in specificity would~~  
336 ~~increase the number of false positives where some patients might be subject to unnecessary~~  
337 ~~treatment with serious side effects and risk of drug resistance. In the clinical context of TB~~  
338 ~~diagnosis, both the LAMP test and the smear microscopy are considered as a diagnostic test~~  
339 ~~which would normally be done in TB suspects with high pre-test probability [14]. Therefore,~~  
340 ~~a serial test relying on both the result from the LAMP test and the acid-fast stain would be~~  
341 ~~more appropriate for use as a rule-in test as it carried higher specificity and positive~~  
342 ~~likelihood ratio than other methods.~~

Formatted: Font: 11 pt

Field Code Changed

343 ~~▲~~ Formatted: English (United States)

344  
345 In this study, the sensitivity of the in-house LAMP test was 82.0% (95%CI 68.6-91.4) in  
346 culture-positive and 16.7% in smear-positive and smear-negative TB patients, respectively.

347 ~~Unlike most of the previous studies which reported higher sensitivity of the LAMP test~~  
348 ~~compared to conventional microscopic examination [7,14], the sensitivity of the LAMP test in~~  
349 ~~our study was just comparable to lower than the smear microscopy. In the past, several~~  
350 ~~studies had reported a higher sensitivity of the in-house LAMP test, which ranges from 90.0~~  
351 ~~to 100.0% [11,15,19-24]. Most of these studies were either University hospitals, TB-~~

Field Code Changed

Formatted: Font: 11 pt

352 ~~specialized centers or hospitals, or national TB-specialized laboratories, which were generally~~  
353 ~~equipped with highly-trained personnel and adequate infrastructural supports. The overall~~  
354 ~~sensitivity of our in-house LAMP was consistent with two previous studies from India and~~  
355 ~~Zambia, which was 79.5% (95%CI 64.0-89.0) and 81.4% (95%CI 71.6-89.0), respectively~~  
356 ~~[12,25]. Although both studies were performed in University hospitals, the LAMP procedures~~  
357 ~~were modified to suit local conditions, and sputum processing and DNA extraction was done~~  
358 ~~with commercial kits. The higher sensitivity of the acid-fast stain and the fluorescence stain~~  
359 ~~in our study could be explained by the high prevalence of TB, the absence of HIV patients or~~

Field Code Changed

Formatted: Font: (Default) Times New Roman, 12 pt

Field Code Changed

360 less number of patients with paucibacillary sputum, and the availability of skilled technicians  
361 ~~[12,26–28][11,18–20]~~. Besides, specimen decontamination with concentrated NaOH  
362 decreases the amount of viable genetic materials for amplification, which could reduce the  
363 sensitivity of both the LAMP test and TB cultures. A lower concentration of NaOH (1-1.5%)  
364 or NaOH free methods during sample decontamination may be suggested ~~[12,29][11,21]~~. ~~The~~  
365 ~~sensitivity of the LAMP test in smear-negative specimens could not be accurately estimated~~  
366 ~~in this study as there were too few smear-negative, culture-positive patients.~~  
367  
368 The overall specificity of the LAMP test was ~~84.6% and 93.1% in smear positive and smear-~~  
369 ~~negative~~ 94.7% (95% CI 85.4-98.9) for non--TB patients, respectively. ~~A positive LAMP~~  
370 ~~result in a smear positive patient is ,therefore, at high risk of false positive, whereas a~~  
371 ~~positive result in a smear negative patient would significantly increase the probability of TB~~  
372 ~~diagnosis [14].~~ This was ~~discordant in concordance~~ with a recent meta-analysesanalysis,  
373 which reported ~~higher~~ pooled specificity ~~ranging from 94.0–98.1% of the in-house LAMP at~~  
374 91.8% (95% CI 86.4-95.1) for smear positive patients and 97.7–98.6% for smear negative  
375 patients [14][7,14]. However, it was concluded that the specificity of the in-house assays was  
376 lower than that of the Loopamp commercial kit, which was reported at 96.5% (95% CI 94.7-  
377 97.7). ~~This was due to the higher occurrence of false positive cases in this study.~~ A false  
378 positive LAMP result in smear-positive cases was frequently encountered in routine practice,  
379 which could ~~usually~~ be explained by multiple factors such as higher temperature, higher  
380 humidity, suboptimal reagents volume, and crossover contamination ~~[14,30][14,22]~~. ~~For in-~~  
381 ~~house LAMP, a~~ An extensive laboratory technician training and continuous quality  
382 assessment should be conducted to lessen the risk of false-positive results. However, other  
383 potential factors might still account for the low specificity, such as temperature controls and  
384 volume of reaction used. For temperature, only available water bath was applied for

Field Code Changed

Formatted: Font: 11 pt

Field Code Changed

Formatted: Font: (Default) Times New Roman

Formatted: Font: (Default) Times New Roman

Field Code Changed

Formatted: Font: 11 pt

Field Code Changed

Formatted: Font: (Default) Times New Roman

Formatted: Font: 11 pt

Field Code Changed

Formatted: Font: (Default) Times New Roman

Formatted: Font: 11 pt

385 temperature controls during LAMP procedures instead of a more stable dry heating block. A  
386 recent study suggested a high reaction volume of 30-35 µl due to the risk of self-priming in

387 concentrated reagents [30][22]. The volume of reaction in our study was lower at 20 µl which  
388 was based on the previous study of the in-house LAMP by The National Institute of Health,  
389 The Ministry of Public Health of Thailand [16].

390  
391 The diagnostic accuracy of the LAMP test in smear-negative specimens was consistent with  
392 previous literature. However, the sensitivity was much lower in our study, which could result  
393 from the low number of TB cases in smear-negative samples. This information supports the  
394 use of LAMP as a rule-in test in smear-negative adult patients. In smear-positive samples, a  
395 serial test of both acid-fast stain and LAMP test would likely result in a more accurate  
396 diagnosis of TB than each in isolation. The WHO had made a conditional recommendation  
397 based on a piece of very low-quality evidence that the LAMP test may be used as an  
398 alternative test for sputum direct microscopic examination to diagnose TB suspects [10].

399 Based on the result of this study, we suggest that both the smear microscopic method and the  
400 LAMP test should be tested in serial to maximize the diagnostic specificity. As the LAMP  
401 test had shown different diagnostic abilities on different smear status [23], the interpretation  
402 of the LAMP test in practice should also rely on the result of smear microscopy and thus  
403 should not be done independently.

404  
405 Currently, the WHO only supported the use of two rapid molecular tests for the diagnosis of  
406 pulmonary tuberculosis, which were Xpert MTB/RIF and the commercialized TB-LAMP test  
407 assay [9][10]. According to previous studies, both had shown comparable performance in  
408 smear-positive samples, but higher sensitivity was shown in Xpert MTB/RIF than in the  
409 LAMP test [6,25][7,24]. Xpert MTB/RIF has been endorsed for use in the diagnosis of TB in

Formatted: Font: (Default) Times New Roman

Formatted: Font: 11 pt

Field Code Changed

Field Code Changed

Formatted: Font: 11 pt

Field Code Changed

Formatted: Font: 11 pt

Field Code Changed

Formatted: Font: 11 pt

Field Code Changed

Formatted: Font: (Default) Times New Roman

Formatted: Font: 11 pt

Field Code Changed

Formatted: Font: (Default) Times New Roman

Formatted: Font: 11 pt

410 many countries, including Thailand [4,31][4,5]. Nonetheless, Xpert MTB/RIF might not be  
411 suitable in peripheral regions with poor infrastructure as the instrument requires a stable  
412 electricity supply and an appropriate environment. The device also requires high continuous  
413 maintenance costs leading to a relatively high cost per test compared to the LAMP test. ~~In~~  
414 ~~contrast, the~~The LAMP test is readily available and can be done in any resource-poor settings  
415 with regular infrastructure and technicians with adequate training. In Thailand, only a portion  
416 of patients, not including foreigners and ethnic minorities, could reimburse the cost for Xpert  
417 MTB/RIF due to the regulation stated by The National Health Security Office (NHSO). To  
418 effectively prevent the spread of TB, all ~~suspected~~ patients to be evaluated for TB should  
419 have equal access to high-quality diagnostic tools. Therefore, smear microscopy and the  
420 LAMP test may be more applicable in terms of accessibility and affordability, especially in  
421 the distant areas and the borderlands.

422  
423 However, there may be some limitations to this study. First, the study size ~~was~~ might not be  
424 powered enough to confirm the statistical insignificance of the between-test comparison.  
425 Second, ~~there were no new suspected TB cases with HIV infection during study~~  
426 ~~recruitment~~ no patients with HIV infection were included during the study period, as HIV  
427 status could be influential to the diagnostic performance of both the smear microscopy and  
428 the LAMP test, especially in areas with a high prevalence of TB-HIV coinfection. Third, this  
429 study had a higher proportion of salivary sputum than mucous sputum. This could affect the  
430 diagnostic performance of both the index and the reference test [32]. The percentage of  
431 culture-positive TB cases was lower in salivary samples than in mucous samples (35.8% vs.  
432 65.0%, p=0.005). Both the quality and quantity of sputum specimens were associated with  
433 the positivity of smear, molecular testing methods (Xpert MTB/RIF and PCR), and TB  
434 culture [33,34]. Thus, it was possible that some patients with pulmonary TB might be

Formatted: Font: (Default) Times New Roman

Formatted: Font: 11 pt

Field Code Changed

Field Code Changed

Formatted: Font: (Default) Times New Roman, 12 pt

Field Code Changed

Formatted: Font: (Default) Times New Roman, 12 pt

435 classified as smear-negative, LAMP-negative, or even culture-negative cases. No previous  
436 study had officially addressed the effect of sputum quality on the LAMP test. Moreover, the  
437 character of sputum specimens was rarely reported. Interestingly, it was revealed from our  
438 data that the proportion of smear-positive, LAMP-positive results was also significantly  
439 lower in salivary sputum than in mucous sputum (31.3% vs. 57.5%, p=0.009 and 29.9% vs.  
440 60.0%, p=0.003, respectively). Therefore, the sensitivity and accuracy of all tests, including  
441 LAMP, might be underestimated. Previous studies reported that by improving the sputum  
442 quality, TB diagnostic yield increased [35,36]. Thus, high-quality sputum collection must be  
443 encouraged both in practice and studies.

Formatted: Font: (Default) Times New Roman, 12 pt

Field Code Changed

444  
445 ~~Third, this study had a higher proportion of salivary sputum than mucous sputum. This could~~  
446 ~~affect the diagnostic performance of both the index and the reference test [25]. The~~  
447 ~~percentage of culture positive TB cases was lower in salivary samples than in mucous~~  
448 ~~samples (32.9% vs. 61.9%, p=0.003). Thus, it was possible that some TB patients might be~~  
449 ~~classified as culture negative or false negative cases.~~ Finally, the use of routine TB culture as  
450 a reference standard might be inadequate, as some TB patients could be classified as not

Formatted: Font: 11 pt

Field Code Changed

451 having TB [6][7]. With a higher quality reference standard, the sensitivity of ~~TB~~ the in-house  
452 LAMP should be increased when a portion of ~~40~~ three remaining false-positive cases was re-  
453 classified as true-positive cases. Different culture media and techniques could be used in  
454 composite to achieve different performance characteristics [37]. In our study, two different  
455 culture techniques, L-J and MGIT, were used to increase the diagnostic rate of TB[38]. We  
456 also applied a strict diagnostic definition in calculating specificity by considering only  
457 patients with smear-negative and culture-negative results[39].

Field Code Changed

Formatted: Font: (Default) Times New Roman, 12 pt

Formatted: Font: 11 pt

Formatted: Font: (Default) Times New Roman

Field Code Changed

Formatted: Font: (Default) Times New Roman, 12 pt

Field Code Changed

Formatted: Font: (Default) Times New Roman, 12 pt

Field Code Changed

Formatted: Font: (Default) Times New Roman, 12 pt

## 459 Conclusions

460 In conclusion, the LAMP test is a practical and affordable nucleic amplification technique for  
461 the diagnosis of pulmonary tuberculosis, which should be implemented in resource-limiting  
462 settings where Xpert MTB/RIF is unavailable. The diagnostic accuracy of the in-hose LAMP  
463 was similar to previous studies for specificity. Better sputum processing and DNA extraction  
464 method should be identified to improve the test sensitivity. -The ~~pragmatic diagnostic~~ overall  
465 accuracy of the in-house LAMP test was comparable to that of conventional microscopy and  
466 fluorescence microscopy with minimal inferiority in terms of sensitivity. ~~To rule in TB~~  
467 ~~diagnosis~~ Therefore, a serial-parallel examination of both smear microscopy and the in-house  
468 LAMP test is suggested to minimize the risk of false ~~positive-negative~~ results, especially in  
469 an endemic area.

470

## 471 **Acknowledgements**

472 The authors wish to acknowledge the contributions of all the medical and nursing staff of the  
473 tuberculosis clinic at Maesot hospital for their help in data collection, and all relevant  
474 personnel of The National Institute of Health, Department of Medical Science, The Ministry  
475 of Public Health for their technical advice and support.

476

477

478

## References

1. World Health Organization. Global Tuberculosis Report 2018. World Health Organization; 2018.
2. Uplekar M, Weil D, Lonroth K, Jaramillo E, Lienhardt C, Dias HM, et al. WHO's new end TB strategy. *Lancet Lond Engl.* 2015;385: 1799–1801. doi:10.1016/S0140-6736(15)60570-0
3. Parsons LM, Somoskövi Á, Gutierrez C, Lee E, Paramasivan CN, Abimiku A, et al. Laboratory Diagnosis of Tuberculosis in Resource-Poor Countries: Challenges and Opportunities. *Clin Microbiol Rev.* 2011;24: 314. doi:10.1128/CMR.00059-10
4. Kim C-K, Cho EA, Shin DM, Choi SW, Shin SY. Comparative Evaluation of the Loop-Mediated Isothermal Amplification Assay for Detecting Pulmonary Tuberculosis. *Ann Lab Med.* 2018;38: 119–124. doi:10.3343/alm.2018.38.2.119
5. Eddabra R, Ait Benhassou H. Rapid molecular assays for detection of tuberculosis. *Pneumonia.* 2018;10. doi:10.1186/s41479-018-0049-2
6. Shete PB, Farr K, Strnad L, Gray CM, Cattamanchi A. Diagnostic accuracy of TB-LAMP for pulmonary tuberculosis: a systematic review and meta-analysis. *BMC Infect Dis.* 2019;19: 268. doi:10.1186/s12879-019-3881-y
7. Notomi T, Okayama H, Masubuchi H, Yonekawa T, Watanabe K, Amino N, et al. Loop-mediated isothermal amplification of DNA. *Nucleic Acids Res.* 2000;28: e63.
8. Yan L, Xiao H, Zhang Q. Systematic review: Comparison of Xpert MTB/RIF, LAMP and SAT methods for the diagnosis of pulmonary tuberculosis. *Tuberc Edinb Scotl.* 2016;96: 75–86. doi:10.1016/j.tube.2015.11.005

Formatted: Font: Times New Roman

Formatted: Bibliography, Line spacing: Double, Widow/Orphan control, Adjust space between Latin and Asian text, Adjust space between Asian text and numbers



- 500 9. The Use of Loop-Mediated Isothermal Amplification (TB-LAMP) for the Diagnosis of  
501 Pulmonary Tuberculosis: Policy Guidance. Geneva: World Health Organization; 2016.  
502 Available: <http://www.ncbi.nlm.nih.gov/books/NBK384520/>
- 503 10. Sohn H, Puri L, Nguyen NAT, Van't Hoog AH, Nguyen VAT, Nliwasa M, et al. Cost and  
504 affordability analysis of TB-LAMP and Xpert MTB/RIF assays as routine diagnostic tests in  
505 peripheral laboratories in Malawi and Vietnam. J Glob Health Sci. 2019;1: e22.  
506 doi:10.35500/jghs.2019.1.e22
- 507 11. Pandey BD, Poudel A, Yoda T, Tamaru A, Oda N, Fukushima Y, et al. Development of an in-  
508 house loop-mediated isothermal amplification (LAMP) assay for detection of Mycobacterium  
509 tuberculosis and evaluation in sputum samples of Nepalese patients. J Med Microbiol. 2008;57:  
510 439–443. doi:10.1099/jmm.0.47499-0
- 511 12. George G, Mony P, Kenneth J. Comparison of the Efficacies of Loop-Mediated Isothermal  
512 Amplification, Fluorescence Smear Microscopy and Culture for the Diagnosis of Tuberculosis.  
513 PLoS ONE. 2011;6. doi:10.1371/journal.pone.0021007
- 514 13. Rudeeaneksin J, Bunchoo S, Srisungngam S, Sawanpanyalert P, Chamnangrom S, Kamolwat A,  
515 et al. Rapid identification of Mycobacterium tuberculosis in BACTEC MGIT960 cultures by in-  
516 house loop-mediated isothermal amplification. Jpn J Infect Dis. 2012;65: 306–311.  
517 doi:10.7883/yoken.65.306
- 518 14. Nagai K, Horita N, Yamamoto M, Tsukahara T, Nagakura H, Tashiro K, et al. Diagnostic test  
519 accuracy of loop-mediated isothermal amplification assay for Mycobacterium tuberculosis:  
520 systematic review and meta-analysis. Sci Rep. 2016;6: 39090. doi:10.1038/srep39090
- 521 15. Phetsuksiri B, Rudeeaneksin J, Srisungngam S, Bunchoo S, Klayut W, Nakajima C, et al.  
522 Comparison of Loop-Mediated Isothermal Amplification, Microscopy, Culture, and PCR for  
523 Diagnosis of Pulmonary Tuberculosis. Jpn J Infect Dis. 2020;advpub.  
524 doi:10.7883/yoken.JIID.2019.335

- 525 16. Kent PT. Public Health Mycobacteriology: A Guide for the Level III Laboratory. U.S.  
526 Department of Health and Human Services, Public Health Service, Centers for Disease Control;  
527 1985.
- 528 17. Phetsuksiri B, Rudeeaneksin J, Srisungngam S, Bunchoo S, Roienthong D, Mukai T, et al.  
529 Applicability of in-house loop-mediated isothermal amplification for rapid identification of  
530 Mycobacterium tuberculosis complex grown on solid media. Jpn J Infect Dis. 2013;66: 249–  
531 251. doi:10.7883/yoken.66.249
- 532 18. Rudeeaneksin J. Rapid Detection of Mycobacterium Tuberculosis Complex in Sputum and in  
533 Culture Growth by LAMP Test. J Health Sci - วารสารวิชาการสาธารณสุข. 2017;19: 300–310.
- 534 19. Rafati A, Gill P. Microfluidic method for rapid turbidimetric detection of the DNA of  
535 Mycobacterium tuberculosis using loop-mediated isothermal amplification in capillary tubes.  
536 Microchim Acta. 2015;182: 523–530. doi:10.1007/s00604-014-1354-y
- 537 20. Poudel A, Pandey BD, Lekhak B, Rijal B, Sapkota BR, Suzuki Y. Clinical profiling and use of  
538 loop-mediated isothermal amplification assay for rapid detection of Mycobacterium tuberculosis  
539 from sputum. Kathmandu Univ Med J KUMJ. 2009;7: 109–114. doi:10.3126/kumj.v7i2.2701
- 540 21. Sethi SK, Singh S, Dhatwalia SK, Yadav R, Mewara A, Singh M, et al. Evaluation of In- House  
541 Loop- Mediated Isothermal Amplification (LAMP) Assay for Rapid Diagnosis of M.  
542 tuberculosis in Pulmonary Specimens. J Clin Lab Anal. 2013;27: 272–276.  
543 doi:10.1002/jcla.21596
- 544 22. Li Y, Shi L, Pan A, Cao W, Chen X, Meng H, et al. Evaluation of real-time loop-mediated  
545 isothermal amplification (RealAmp) for rapid detection of Mycobacterium tuberculosis from  
546 sputum samples. J Microbiol Methods. 2014;104: 55–58. doi:10.1016/j.mimet.2014.06.011
- 547 23. Lee M-F, Chen Y-H, Peng C-F. Evaluation of reverse transcription loop-mediated isothermal  
548 amplification in conjunction with ELISA-hybridization assay for molecular detection of

- 549 [Mycobacterium tuberculosis. J Microbiol Methods. 2009;76: 174–180.](#)  
550 [doi:10.1016/j.mimet.2008.10.005](#)
- 551 24. [Kohan L, Shahhosseiny MH, Razavi MR, Parivar K, Moslemi E, Werngren J. Evaluation of](#)  
552 [loop mediated isothermal amplification for diagnosis of \*Mycobacterium tuberculosis\* complex in](#)  
553 [clinical samples. Afr J Biotechnol. 2011;10: 5096–5101. doi:10.4314/ajb.v10i26.](#)
- 554 25. [Habeenzu C, Nakajima C, Solo E, Bwalya P, Kajino K, Miller M, et al. Evaluation of in-house](#)  
555 [loop-mediated isothermal amplification for tuberculosis diagnosis compared with Xpert](#)  
556 [MTB/RIF. J Infect Dev Ctries. 2017;11: 440–444. doi:10.3855/jidc.7730](#)
- 557 26. [Pandey BD, Poudel A, Yoda T, Tamaru A, Oda N, Fukushima Y, et al. Development of an in-](#)  
558 [house loop-mediated isothermal amplification \(LAMP\) assay for detection of \*Mycobacterium\*](#)  
559 [tuberculosis and evaluation in sputum samples of Nepalese patients. J Med Microbiol. 2008;57:](#)  
560 [439–443. doi:10.1099/jmm.0.47499-0](#)
- 561 27. [Pathak D, Chakravorty S, Hanif M, Tyagi JS. Lysis of tubercle bacilli in fresh and stored](#)  
562 [sputum specimens: implications for diagnosing tuberculosis in stored and paucibacillary](#)  
563 [specimens by PCR. BMC Microbiol. 2007;7: 83. doi:10.1186/1471-2180-7-83](#)
- 564 28. [Shea YR, Davis JL, Huang L, Kovacs JA, Masur H, Mulindwa F, et al. High Sensitivity and](#)  
565 [Specificity of Acid-Fast Microscopy for Diagnosis of Pulmonary Tuberculosis in an African](#)  
566 [Population with a High Prevalence of Human Immunodeficiency Virus. J Clin Microbiol.](#)  
567 [2009;47: 1553–1555. doi:10.1128/JCM.00348-09](#)
- 568 29. [Pham TH, Peter J, Mello FCQ, Parraga T, Lan NTN, Nabeta P, et al. Performance of the TB-](#)  
569 [LAMP diagnostic assay in reference laboratories: Results from a multicentre study. Int J Infect](#)  
570 [Dis IJID Off Publ Int Soc Infect Dis. 2018;68: 44–49. doi:10.1016/j.ijid.2018.01.005](#)
- 571 30. [Gray CM, Katamba A, Narang P, Giraldo J, Zamudio C, Joloba M, et al. Feasibility and](#)  
572 [Operational Performance of Tuberculosis Detection by Loop-Mediated Isothermal](#)

- 573 [Amplification Platform in Decentralized Settings: Results from a Multicenter Study. J Clin](#)  
574 [Microbiol. 2016;54: 1984–1991. doi:10.1128/JCM.03036-15](#)
- 575 31. [Pai M, Flores LL, Pai N, Hubbard A, Riley LW, Colford JM. Diagnostic accuracy of nucleic](#)  
576 [acid amplification tests for tuberculous meningitis: a systematic review and meta-analysis.](#)  
577 [Lancet Infect Dis. 2003;3: 633–643. doi:10.1016/s1473-3099\(03\)00772-2](#)
- 578 32. [Shi J, Dong W, Ma Y, Liang Q, Shang Y, Wang F, et al. GeneXpert MTB/RIF Outperforms](#)  
579 [Mycobacterial Culture in Detecting Mycobacterium tuberculosis from Salivary Sputum. In:](#)  
580 [BioMed Research International \[Internet\]. 2018 \[cited 12 Dec 2019\]. Available:](#)  
581 <https://www.hindawi.com/journals/bmri/2018/1514381/>
- 582 33. [Ho J, Marks GB, Fox GJ. The impact of sputum quality on tuberculosis diagnosis: a systematic](#)  
583 [review. Int J Tuberc Lung Dis Off J Int Union Tuberc Lung Dis. 2015;19: 537–544.](#)  
584 [doi:10.5588/ijtld.14.0798](#)
- 585 34. [Yoon SH, Lee NK, Yim JJ. Impact of sputum gross appearance and volume on smear positivity](#)  
586 [of pulmonary tuberculosis: a prospective cohort study. BMC Infect Dis. 2012;12: 172.](#)  
587 [doi:10.1186/1471-2334-12-172](#)
- 588 35. [Hirooka T, Higuchi T, Tanaka N, Ogura T. \[The value of proper sputum collection instruction in](#)  
589 [detection of acid-fast bacillus\]. Kekkaku. 2004;79: 33–37.](#)
- 590 36. [Sicsú AN, Salem JI, Fujimoto LBM, Gonzales RIC, Cardoso M do S de L, Palha PF.](#)  
591 [Educational intervention for collecting sputum for tuberculosis: a quasi-experimental study 1.](#)  
592 [Rev Lat Am Enfermagem. 2016;24. doi:10.1590/1518-8345.0363.2703](#)
- 593 37. [Cudahy P, Shenoi S. Diagnostics for pulmonary tuberculosis. Postgrad Med J. 2016;92: 187–](#)  
594 [193. doi:10.1136/postgradmedj-2015-133278](#)

- 595 38. Kadioglu EE, Ucar EY, Araz O, Aktas E, Saglam L. A Comparison of Two Different Culture  
596 Methods for Use in the Diagnosis of Pulmonary Tuberculosis. Eurasian J Med. 2014;46: 74–77.  
597 doi:10.5152/eajm.2014.19
- 598 39. Kaku T, Minamoto F, D’Meza R, Morose W, Boncy J, Bijou J, et al. Accuracy of LAMP-TB  
599 Method for Diagnosing Tuberculosis in Haiti. Jpn J Infect Dis. 2016;69: 488–492.  
600 doi:10.7883/yoken.JJID.2015.519
- 601 ~~1. World Health Organization. Global Tuberculosis Report 2018. World Health~~  
602 ~~Organization; 2018.~~
- 603 ~~2. Uplekar M, Weil D, Lonnroth K, Jaramillo E, Lienhardt C, Dias HM, et al. WHO’s new~~  
604 ~~end TB strategy. Lancet Lond Engl. 2015;385: 1799–1801. doi:10.1016/S0140-~~  
605 ~~6736(15)60570-0~~
- 606 ~~3. Parsons LM, Somoskövi Á, Gutierrez C, Lee E, Paramasivan CN, Abimiku A, et al.~~  
607 ~~Laboratory Diagnosis of Tuberculosis in Resource-Poor Countries: Challenges and~~  
608 ~~Opportunities. Clin Microbiol Rev. 2011;24: 314. doi:10.1128/CMR.00059-10~~
- 609 ~~4. Kim C-K, Cho EA, Shin DM, Choi SW, Shin SY. Comparative Evaluation of the Loop-~~  
610 ~~Mediated Isothermal Amplification Assay for Detecting Pulmonary Tuberculosis. Ann~~  
611 ~~Lab Med. 2018;38: 119–124. doi:10.3343/alm.2018.38.2.119~~
- 612 ~~5. Pai M, Flores LL, Pai N, Hubbard A, Riley LW, Colford JM. Diagnostic accuracy of~~  
613 ~~nucleic acid amplification tests for tuberculous meningitis: a systematic review and~~  
614 ~~meta-analysis. Lancet Infect Dis. 2003;3: 633–643. doi:10.1016/s1473-3099(03)00772-~~  
615 ~~2~~
- 616 ~~6. Eddabra R, Ait Benhassou H. Rapid molecular assays for detection of tuberculosis.~~  
617 ~~Pneumonia. 2018;10. doi:10.1186/s41479-018-0049-2~~

Formatted: Line spacing: Double

- 618 7. Shete PB, Farr K, Strnad L, Gray CM, Cattamanchi A. Diagnostic accuracy of TB-  
619 LAMP for pulmonary tuberculosis: a systematic review and meta-analysis. *BMC Infect*  
620 *Dis.* 2019;19: 268. doi:10.1186/s12879-019-3881-y
- 621 8. Notomi T, Okayama H, Masubuchi H, Yonekawa T, Watanabe K, Amino N, et al.  
622 Loop-mediated isothermal amplification of DNA. *Nucleic Acids Res.* 2000;28: e63.
- 623 9. Yan L, Xiao H, Zhang Q. Systematic review: Comparison of Xpert MTB/RIF, LAMP  
624 and SAT methods for the diagnosis of pulmonary tuberculosis. *Tuberc Edinb Scotl.*  
625 2016;96: 75–86. doi:10.1016/j.tube.2015.11.005
- 626 10. The Use of Loop-Mediated Isothermal Amplification (TB-LAMP) for the Diagnosis of  
627 Pulmonary Tuberculosis: Policy Guidance. Geneva: World Health Organization; 2016.  
628 Available: <http://www.ncbi.nlm.nih.gov/books/NBK384520/>
- 629 11. George G, Mony P, Kenneth J. Comparison of the Efficacies of Loop-Mediated  
630 Isothermal Amplification, Fluorescence Smear Microscopy and Culture for the  
631 Diagnosis of Tuberculosis. *PLoS ONE.* 2011;6. doi:10.1371/journal.pone.0021007
- 632 12. Ou X, Li Q, Xia H, Pang Y, Wang S, Zhao B, et al. Diagnostic accuracy of the PURE-  
633 LAMP test for pulmonary tuberculosis at the county-level laboratory in China. *PLoS*  
634 *One.* 2014;9: e94544. doi:10.1371/journal.pone.0094544
- 635 13. Rudeeaneksin J, Bunchoo S, Srisungngam S, Sawanpanyalert P, Chamnangrom S,  
636 Kamolwat A, et al. Rapid identification of *Mycobacterium tuberculosis* in BACTEC  
637 MGIT960 cultures by in-house loop-mediated isothermal amplification. *Jpn J Infect*  
638 *Dis.* 2012;65: 306–311. doi:10.7883/yoken.65.306

- 639 ~~14. Nagai K, Horita N, Yamamoto M, Tsukahara T, Nagakura H, Tashiro K, et al.~~  
640 ~~Diagnostic test accuracy of loop-mediated isothermal amplification assay for~~  
641 ~~Mycobacterium tuberculosis: systematic review and meta-analysis. Sci Rep. 2016;6:~~  
642 ~~39090. doi:10.1038/srep39090~~
- 643 ~~15. Kent PT. Public Health Mycobacteriology: A Guide for the Level III Laboratory. U.S.~~  
644 ~~Department of Health and Human Services, Public Health Service, Centers for Disease~~  
645 ~~Control; 1985.~~
- 646 ~~16. Phetsuksiri B, Rudeeaneksin J, Srisungngam S, Bunchoo S, Roienthong D, Mukai T, et~~  
647 ~~al. Applicability of in-house loop-mediated isothermal amplification for rapid~~  
648 ~~identification of Mycobacterium tuberculosis complex grown on solid media. Jpn J~~  
649 ~~Infect Dis. 2013;66: 249–251. doi:10.7883/yoken.66.249~~
- 650 ~~17. Rudeeaneksin J. Rapid Detection of Mycobacterium Tuberculosis Complex in Sputum~~  
651 ~~and in Culture Growth by LAMP Test. J Health Sci. 2017;19: 300–310.~~
- 652 ~~18. Pandey BD, Poudel A, Yoda T, Tamaru A, Oda N, Fukushima Y, et al. Development of~~  
653 ~~an in-house loop-mediated isothermal amplification (LAMP) assay for detection of~~  
654 ~~Mycobacterium tuberculosis and evaluation in sputum samples of Nepalese patients. J~~  
655 ~~Med Microbiol. 2008;57: 439–443. doi:10.1099/jmm.0.47499-0~~
- 656 ~~19. Pathak D, Chakravorty S, Hanif M, Tyagi JS. Lysis of tubercle bacilli in fresh and~~  
657 ~~stored sputum specimens: implications for diagnosing tuberculosis in stored and~~  
658 ~~paucibacillary specimens by PCR. BMC Microbiol. 2007;7: 83. doi:10.1186/1471-2180-~~  
659 ~~7-83~~
- 660 ~~20. Shea YR, Davis JL, Huang L, Kovacs JA, Masur H, Mulindwa F, et al. High Sensitivity~~  
661 ~~and Specificity of Acid-Fast Microscopy for Diagnosis of Pulmonary Tuberculosis in an~~

- 662 African Population with a High Prevalence of Human Immunodeficiency Virus. *J Clin*  
663 *Microbiol.* 2009;47: 1553–1555. doi:10.1128/JCM.00348-09
- 664 21.—Pham TH, Peter J, Mello FCQ, Parraga T, Lan NTN, Nabeta P, et al. Performance of the  
665 TB-LAMP diagnostic assay in reference laboratories: Results from a multicentre study.  
666 *Int J Infect Dis IJID Off Publ Int Soc Infect Dis.* 2018;68: 44–49.  
667 doi:10.1016/j.ijid.2018.01.005
- 668 22.—Gray CM, Katamba A, Narang P, Giraldo J, Zamudio C, Joloba M, et al. Feasibility and  
669 Operational Performance of Tuberculosis Detection by Loop-Mediated Isothermal  
670 Amplification Platform in Decentralized Settings: Results from a Multicenter Study. *J*  
671 *Clin Microbiol.* 2016;54: 1984–1991. doi:10.1128/JCM.03036-15
- 672 23.—Horita N, Yamamoto M, Sato T, Tsukahara T, Nagakura H, Tashiro K, et al. Sensitivity  
673 and specificity of Cobas TaqMan MTB real-time polymerase chain reaction for culture-  
674 proven *Mycobacterium tuberculosis*: meta-analysis of 26999 specimens from 17  
675 Studies. *Sci Rep.* 2015;5. doi:10.1038/srep18113
- 676 24.—Habeenzu C, Nakajima C, Solo E, Bwalya P, Kajino K, Miller M, et al. Evaluation of  
677 in-house loop-mediated isothermal amplification for tuberculosis diagnosis compared  
678 with Xpert MTB/RIF. *J Infect Dev Ctries.* 2017;11: 440–444. doi:10.3855/jide.7730
- 679 25.—Shi J, Dong W, Ma Y, Liang Q, Shang Y, Wang F, et al. GeneXpert MTB/RIF  
680 Outperforms Mycobacterial Culture in Detecting *Mycobacterium tuberculosis* from  
681 Salivary Sputum. *BioMed Res Int.* 2018;2018. doi:10.1155/2018/1514381

682



683 **Supporting information**

Formatted: Font: 18 pt, Bold

684 **S1 Table. Review on diagnostic accuracy of in-house LAMP assays for diagnosis of**  
685 **pulmonary tuberculosis (DOCX)**

686 **S2 Table. LAMP minimal dataset (CSV)**

Formatted: Font: Bold

Formatted: Font: Bold

Formatted: Line spacing: Double

Formatted: Normal, Space After: 8 pt, Line spacing: Double

687

## Responses to Reviewers' comments

### Pragmatic accuracy of loop-mediated isothermal amplification (LAMP) for diagnosis of pulmonary tuberculosis in a Thai community hospital

#### Reviewer #1:

1. The study aims to evaluate usefulness of a LAMP method in a practical setting in Thailand. The LAMP method is now available as an only commercial kit TB-LAMP assay (Loopamp<sup>TM</sup>MTBC Detection Kit, Eiken Chemical Company Ltd., Japan) as endorsed by WHO in 2016. It seems that the method used in this study is a unique system at least partially. So, it is important to state explicitly that the target to be evaluated was an in-house LAMP and not one commercially available LAMP recommended by WHO.
  - The LAMP test in our study was a non-commercial, in-house LAMP.
  - We re-wrote the manuscript and emphasized that the test used was in-house LAMP.
2. In evaluating the sensitivity of the method, the authors used culture negative (clinically defined) cases, as well as bacteriologically confirmed cases, as a gold standard of the cases of TB. It may be difficult to admit the clinical diagnosis as a diagnostic basis for such a study as this, apart from clinical practice. Vice versa, the definition of the gold (conventional) standard for specificity (non-cases) should be reconsidered. The following paper may be of use in revising the paper; Kaku et al: Accuracy of LAMP-TB Method for Diagnosing Tuberculosis in Haiti. *Jpn. J. Infect. Dis.*, 69, 488–492, 2016.
  - We modified the inclusion criteria for analysis as suggested by both reviewers.
  - As the analysis was done in a per-patient fashion, patients with smear-positive and culture-negative results would be excluded, as these patients were considered as probable TB cases. Therefore, the evaluation of sensitivity would include patients with both smear positive and smear negative with positive culture results. In contrast, the evaluation of specificity would include only patients with smear-negative and culture-negative results.

## Reviewer #2:

1. Abstract/Background: “proven diagnostic performance” – this is both vague and too specific at the same time, “most of the results were validated” – the results aren’t validated, the assay is validated
  - We rewrote the abstract and introduction part as suggested.
2. The language surrounding people with possible TB needs to be updated throughout the paper - avoid the use of terms like "TB suspects" that increase the stigma surrounding this disease. [http://www.stoptb.org/assets/documents/resources/publications/acsm/LanguageGuide\\_ForWeb20131110.pdf](http://www.stoptb.org/assets/documents/resources/publications/acsm/LanguageGuide_ForWeb20131110.pdf)
  - We rewrote the abstract and introduction part as suggested.
3. The paper states repeatedly that there is little work published from resource-challenged settings, but this claim is not supported. Even the references given cite studies in such decentralized settings. Maybe it just hasn’t been done in Thailand? A better summary of the literature needs to be included. How does this compare to other studies? How is the TB LAMP test performed in this study compare to the TB LAMP tests in other published literature? A better focus on properly relating the current study to the body of work in the literature rather than trying to claim it is quite novel would actually strengthen the paper. There is merit in replication or demonstrating an important diagnostic in a new geographical area.
  - We rewrote the abstract and introduction part as suggested.
4. In-house vs commercialized kit is mentioned but not explained. And the position of this paper (what LAMP testing approach is used) is not properly placed in the context of what other papers are using and the potential impact on sensitivity/specificity.
  - We rewrote the abstract and introduction part as suggested.
5. The sensitivity/specificity of LAMP in other papers, settings, etc needs to be stated with numbers and not just alluded to. A proper, specific summary of the literature is lacking.
  - We rewrote the abstract and introduction part as suggested.
6. “In 2016, WHO suggested the use of LAMP assay for the diagnosis of pulmonary tuberculosis” – this is not quite right, WHO recommendations are very specific and it is important to get that right. From the abstract of the citation provided: “WHO recommends that TB-LAMP can be used as a replacement for microscopy for the diagnosis of pulmonary TB in adults with signs and symptoms of TB”. This needs to be stated correctly. Also, given the paper has mentioned in-house vs commercialized kits, it needs to be clarified that the WHO guidance refers only to the Eiken LAMP kit.
  - We rewrote the abstract and introduction part as suggested.
7. “LAMP assay has a low cost per test, does not required advanced technological facilities, and can be routinely practiced in general hospital laboratories [3].” Reference 3 doesn’t support this statement – it doesn’t say anywhere that the LAMP assay has a low cost per test. It says “Costs can be kept to a minimum if testing is limited to specimens from the most high-risk patients based on proper clinical assessments and national testing algorithms based on public health policies.” There are other publications on the cost of the LAMP assay for TB diagnosis. The authors might explain better the infrastructure/training needed for LAMP based on this reference and others.
  - We rewrote the abstract and introduction part as suggested.
  - We changed the references to the statement as follow: Sohn H. Cost, affordability, and cost-effectiveness of TB-LAMP assay. In: Report to WHO Guideline Development Group Meeting on TB-LAMP Assay. Edn. Geneva: World Health Organization; 2016 and Shete PB, Farr K, Strnad L, Gray CM, Cattamanchi A. Diagnostic accuracy of TB-LAMP for pulmonary tuberculosis: a systematic review

and meta-analysis. BMC Infect Dis. 2019;19(1):268. Published 2019 Mar 19.  
doi:10.1186/s12879-019-3881-y

8. Reference 5 doesn't appear to really relate to the sentences it comes after. Reference 3 would make a lot more sense as it is a detailed overview of TB diagnostics including many molecular diagnostics.
  - We rewrote the abstract and introduction part as suggested.

## Setting

1. The paper needs to do more to state what sets this setting apart from (or ties it to) other studies. See the methods section describing setting in reference 22 for how attributes of the specific site can be expressed in the context of the needs of LAMP.
  - We elaborated the character of our setting as suggested:
  - Level of health system: rural
  - Distance to reference laboratory: 0 km
  - Median LAMP test workload: 6 (4-10)
  - Electricity and backup power: infrequent power outages, power generator (350 Kw) and UPS (2.7 Kw)
  - Biosafety cabinet infrastructure: BSC class II
  - Laboratory staff: 4 lab technicians, 1 lab assistant
2. Study Design: This is not a cross-sectional design; it is a prospective design. The plan was to prospectively enroll 120 patients.
  - We changed the type of design to prospective diagnostic accuracy study as suggested.
  - We would like to make a constructive argument on this point, as the diagnostic accuracy research is actually cross-sectional study in design. The cross-sectional design is only the type of membership condition, single component of study base, and cross-sectional design can therefore be collected prospectively or retrospectively. We would like to ask you to kindly refer to this reference: Assessment of the accuracy of diagnostic tests: the cross-sectional study by Knottnerus JA, 2003.  
Link: <https://www.ncbi.nlm.nih.gov/pubmed/14615003>
3. "New patients who were clinically suspected of 109 pulmonary TB (coughing for more than two weeks with or without hemoptysis), aged more than 18 years old were consecutively invited into the study regardless of nation status." Suggest re-writing to something more like: 'Adults more than 18yrs of age with symptoms indicative of pulmonary TB (coughing...) and no history of TB were consecutively enrolled regardless of national status.' If patients were 'invited' but not enrolled, we need numbers on how many declined.
  - We re-wrote the sentence as suggested: Adult patients aged more than 15 years old with symptoms indicative of pulmonary TB (coughing for more than two weeks with or without hemoptysis) and no history of TB were consecutively enrolled regardless of national status.
4. "Samples with contaminated culture results or samples from patients who were previously documented as TB cases were excluded." Were the patients excluded or the samples?
  - Patients with previously documented TB cases were excluded.
  - Patients with two contaminated or missing culture results were excluded.

## Methods

1. A map of which samples were used for what tests would be quite helpful. Highlight if any of the reference tests (smear, LJ culture, MGIT culture) were performed on the same sputum as LAMP.
  - Conventional macroscopy, LAMP test, and culture were conducted as routinely done.

- All patients were given three sealed containers for the collection of morning sputum specimens. Of all containers sent to the laboratory, only the one with seemingly adequate sputum, containing both mucoid or mucopurulent characters with a sample volume more than 3 ml, was used for the whole investigation procedures as routinely done. Specimens were sent for smear microscopy with conventional acid-fast bacilli (AFB) staining with Ziehl-Neelsen technique and fluorescence acid-fast staining with Auramine O solution.
2. Make it clear somewhere that smear-negative refers to AFB smear-negative.
    - We added detail on the smear-negative status as suggested.
    - According to WHO definitions, any patient with at least two AFB smears of scanty grade or one or more smears of 1+ or more was defined as smear-positive case. Smear-negative case was conversely defined.
  3. Study size estimation
 

This has no purpose here – the study is done. Sample size estimation is for study planning purposes, for securing funding and making sure the plan has statistical validity.

    - The study size estimation part was removed as suggested.
  4. Statistical analysis. The first four sentences are unnecessary.
    - The first four sentences were removed as suggested.
  5. The authors need to state what method was used to obtain the 95% CI for the sens/spec/PPV/NPV/LR+. It is clear from my testing that the Clopper Pearson binomial exact test was used, the authors should include the reference (usually found in the software documentation).
    - The 95% confidence intervals were calculated using the Clopper Pearson binomial exact method.
    - We added this statement in the statistical section and added the citation as suggested.
  6. Kappa statistics are for inter-reader reliability, not for comparison of correlations between tests. It includes the concept that agreement may happen by chance when two people are guessing. However, it is not appropriate for comparison of diagnostic results because there isn't guessing – the samples should not agree by chance but because they are or are not TB and the sensitivities of tests objectively vary. Spearman's correlation can be used, but I think what you actually want is McNemar's test. The desire is to compare the diagnostic performance (i.e. accuracy) between tests – McNemar's test will do that. Alternatively, Spearman's correlation can look at the [objective] agreement between tests.
    - Spearman's rank correlation was inserted into the manuscript to represent the objective agreement between tests as suggested.
    - The agreement of LAMP test with smear microscopy methods was analyzed with Kappa's statistics and Spearman's rank correlation.
    - We still presented the value of Kappa's statistics as many of the previous studies on LAMP assay and other diagnostic tests had done [1–3].

## Results

1. Table 1 is dedicated to showing the patient clinical characteristics by culture status. The p-values shown test whether these characteristics differ significantly dependent on culture status. It is expected that gender, nationality, and age should not differ. Whereas it is also expected that chest x-rays and sputum quality would differ. The baseline demographic data between culture 188 positive and negative patients were comparable except for the presence of cavitory lesions on 189 chest radiographs and the character of collected sputum (Table 1). Age, nationality, and gender are demographic data. Chest x-ray and sputum quality are clinical characteristics.
  - We reanalyzed all the data after exclusion of patients with probable TB (LAMP test positive and AFB smear positive patients with negative culture).
  - All the baseline demographic and clinical characteristics data were reanalyzed and presented in Table 1.
  - The statements in the results section were re-written as suggested.
2. Table 2 – re-check the NPV for parallel testing
  - We reanalyzed all the data after exclusion of patients with probable TB (LAMP test positive and AFB smear positive patients with negative culture).
  - All the data on Table 2 were checked for any error as suggested.
3. There are a lot of LAMP-positive and AFB smear-positive patients with negative culture. Especially given that the tests are done on different sputum samples, these should be considered patients with probable TB and not used in assessing sensitivity and specificity.
  - We reanalyzed all the data after exclusion of patients with probable TB (LAMP test positive and AFB smear positive patients with negative culture).
  - The final study size for analysis of LAMP test diagnostic accuracy was therefore 107 patients. (8 patients were excluded, 6 patients with both LAMP test and AFB smear-positive and culture negative, 1 patient with AFB positive and culture negative, and 1 patient with fluorescence stain positive and culture negative)
4. There are too few smear-negative, culture-positive patients to assess sensitivity. Specificity should not be stratified by smear status, only sensitivity. For the reason above (that smear-positive, culture-negative patients shouldn't be included in estimations of sensitivity/specificity of LAMP), what the paper is calling 'smear-negative specificity' should in fact be reported as the actual specificity of LAMP.
  - We exclude smear-positive, culture negative patients from the analysis as suggested.
  - We reported the actual specificity of LAMP test without stratification.
  - We acknowledged that our there are too few smear negative, culture positive patients to assess sensitivity in the discussion part.
5. Table 2 – the p-values shown have no real meaning! If you want to compare accuracy of tests, you cannot do a p-value over the final accuracy measures among a bunch of tests. You need to compare tests 1 against another by using 2x2 grids and McNemar's test. So, if you want to compare the accuracy of LAMP to the accuracy of AFB stain, you use the grid in Table 3 and McNemar's test:
  - The comparison of diagnostic indices between LAMP test and AFB, fluorescence stain was re-analyzed using McNemar's exact probability test as suggested. We presented the result of the pairwise tests separately and reformatted Table 2.
  - Pairwise testing was not performed to compare the specificity between the LAMP test and the smear microscopy methods as the specificity of the latter was affected by incorporation bias and would not be comparable to the in-house LAMP.
  - Table 3 was also reformatted.
  - Spearman's rank correlation was used as suggested.

## Discussion

1. “This study had demonstrated the pragmatic performance of the LAMP test, which was comparable to that of the conventional smear microscopy and the fluorescence microscopy.” Not true, the performance of LAMP as evaluated in this study was below that of smear microscopy.
  - We rewrote the discussion part as suggested.
  - “This study had demonstrated the pragmatic diagnostic performance of the in-house LAMP assay in a remote hospital of a high TB burden country. It was revealed that the overall sensitivity of the in-house LAMP in our study was lower than the numbers reported in the majority of the previous in-house LAMP studies. Nonetheless, the specificity was comparable to other figures reported in literature. In comparison to microscopy methods, the AFB and fluorescence stain, the in-house LAMP was found to be inferior in terms of overall sensitivity (82.0% vs. 88.0%,  $p=0.375$ ) and accuracy (88.8% vs. 94.4%,  $p=1.000$ ); however, the comparative statistical test revealed non-significant results. Based on the result of our study, we suggest that the in-house LAMP should not be a substitute to conventional smear methods, but should be done in parallel, which would result in a higher sensitivity with fewer false-negative TB cases.”
2. “Although the sensitivity and specificity of the LAMP test were lower than that of the acid-fast stain and the fluorescence stain, the comparative statistical test revealed non-significant results” This is still true when McNemar’s test is performed, but the right statistical tests need to be used in the paper. Furthermore, a non-significant result doesn’t mean no difference, it means the difference is likely smaller than the power of the study to detect.
  - We rewrote the discussion part as suggested.
  - We reanalyzed our data using McNemar’s exact probability test as suggested.
3. Put PPV/NPV in the context of the local prevalence of disease! State from the literature or reliable source what the prevalence of TB is in the hospital’s area of Thailand. I would suggest giving the readers an example: Given that prevalence and a group of 1000 patients, state how many would be true positives, false positive, true negatives, and false negatives. You can therefore assess what burden the different accuracies will place on the hospital. I.e. if the specificity is quite low and the sensitivity is higher, is that better? If the sensitivity is high and the specificity is lower, is that better? Relate this to the LR+.
  - We would like to make a constructive argument to this question as follow: The prevalence of culture-positive TB in this study was 46.7%. As this was a “consecutive recruitment of patients with sign and symptoms suggestive of pulmonary TB” or “patients with higher pre-test probability that the general prevalence” or the “person that the in-house LAMP test was intended to be used”, the calculation of positive predictive values could be directly calculated and reported from the study data as in the other study [1]. Moreover, both the in-house LAMP assay and acid-fast stain were not intended to be used as screening tests in the general population. For this reason, we did not include this part in our manuscript; however, we provide the answer to the question in this response paper.
  - The latest Maesot’s population figures from the Health Data Center (HDC), the ministry of public health, Thailand, was 115,108 in 2019. The prevalence of pulmonary tuberculosis was 351 per 100,000 or 35 per 10,000.

|               | TB case | Non-TB case | Total |                     |
|---------------|---------|-------------|-------|---------------------|
| LAMP positive | 29      | 528         | 557   | PPV 29/557=5.2%     |
| LAMP negative | 6       | 9,437       | 9,443 | NPV 9437/9443=94.9% |

|       |    |       |        |                   |
|-------|----|-------|--------|-------------------|
| Total | 35 | 9,965 | 10,000 | Prevalence=0.0035 |
|-------|----|-------|--------|-------------------|

4. “In the clinical context of TB diagnosis, both the LAMP test and the smear microscopy are considered as a diagnostic test which would normally be done in TB suspects with high pre-test probability [14]” – this is not what the reference says.
  - The reference states “The TB LAMP assay is usually applied for TB-suspected patients and is rarely used for screening purpose. To rule-in the TB diagnosis, specificity is more important than sensitivity.”
  - What we’re trying to imply from this statement was that the LAMP test was developed to be applied for patients who were suspicious of having TB with “higher pre-test probability than average person”. As the LAMP test was not for screening purpose, specificity is more important and should be more focused than sensitivity.
  - After we re-analyzed the data with the exclusion of probable TB cases, our specificity increased to comparable level with previous studies. The parallel and serial testing was omitted from our analysis as the test accuracy of combination of the in-house LAMP with other smear microscopy methods would be seriously affected by incorporation bias (smear-positive, culture-negative patients were all excluded.
5. “Therefore, a serial test relying on both the result from the LAMP test and the acid-fast stain would be more appropriate for use as a rule-in test as it carried higher specificity and positive likelihood ratio than other methods.” Authors should define ‘rule-in’ test and what is generally expected of such a test. Should note the increased cost of such an approach.
  - After we re-analyzed the data with the exclusion of probable TB cases, our specificity increased to comparable level with previous studies. The parallel and serial testing was omitted from our analysis as the test accuracy of combination of the in-house LAMP with other smear microscopy methods would be seriously affected by incorporation bias (smear-positive, culture-negative patients were all excluded.
6. The effect of a gold standard which is not itself perfect should be discussed. Also the variability between sputum samples should be discussed.
  - The use of routine TB culture as a reference standard might be inadequate, as some TB patients could be classified as not having TB [6]. Different culture media and techniques could be used in composite to achieve different performance characteristics[4]. With a higher quality reference standard, the sensitivity of the in-house LAMP should be increased when a portion of three remaining false-positive cases was re-classified as true-positive cases.
  - This study had a higher proportion of salivary sputum than mucous sputum. This could affect the diagnostic performance of both the index and the reference test[5]. The percentage of culture-positive TB cases was lower in salivary samples than in mucous samples (35.8% vs. 65.0%,  $p=0.005$ ). Both the quality and quantity of sputum specimens were associated with positivity of smear, molecular testing methods (Xpert MTB/RIF and PCR), and TB culture [6,7]. Thus, it was possible that some patients with pulmonary TB might be classified as smear-negative, LAMP-negative, or even culture-negative cases. Interestingly, it was revealed from our data that the proportion of smear-positive, LAMP-positive results was also significantly lower in salivary sputum than in mucous sputum (31.3% vs 57.5%,  $p=0.009$  and 29.9% vs. 60.0%,  $p=0.003$ , respectively). Therefore, the sensitivity and accuracy of all tests, including LAMP, might be underestimated. Previous studies reported that by improving the sputum quality, TB diagnostic yield increased[8,9]. Therefore, high-quality sputum collection must be encouraged both in practice and studies.
7. A better look at the differences between this study and others with better test performance needs to be done.
  - In this study, the sensitivity of the in-house LAMP test was 82.0% (95% CI 68.6-91.4) in culture-positive TB patients, respectively. In the past, several studies had reported



a higher sensitivity of the in-house LAMP test, which ranges from 90.0 to 100.0%. Most of these studies were either University hospital, TB-specialized centers or hospitals, or national TB-specialized laboratory, which were generally equipped with highly-trained personnel and adequate infrastructural supports. The overall sensitivity of our in-house LAMP was consistent with two previous studies from India and Zambia, which was 79.5% (95%CI 64.0-89.0) and 81.4% (95%CI 71.6-89.0), respectively. Although both studies were performed in University hospitals, the LAMP procedures were modified to suit local conditions, and sputum processing and DNA extraction was done with commercial kits. The higher sensitivity of the acid-fast stain and the fluorescence stain in our study could be explained by the high prevalence of TB, the absence of HIV patient or a smaller number of patients with paucibacillary sputum, and the availability of skilled technicians

8. “Currently, the WHO only supported the use of two rapid molecular tests for the diagnosis of 294 pulmonary tuberculosis, which were Xpert MTB/RIF and the LAMP test” – as the concept of LAMP test from a kit and other LAMP tests has been raised, and the variability of accuracy depending, it needs to be clear that the WHO recommendation is only for the Eiken LAMP test kit!
  - We edited the statement as follow: “Currently, the WHO only supported the use of two rapid molecular tests for the diagnosis of pulmonary tuberculosis, which were Xpert MTB/RIF and the commercialized TB-LAMP assay”.

## References

1. George G, Mony P, Kenneth J. Comparison of the Efficacies of Loop-Mediated Isothermal Amplification, Fluorescence Smear Microscopy and Culture for the Diagnosis of Tuberculosis. *PLoS ONE*. 2011;6. doi:10.1371/journal.pone.0021007
2. Phetsuksiri B, Rudeeaneksin J, Srisungngam S, Bunchoo S, Klayut W, Nakajima C, et al. Comparison of Loop-Mediated Isothermal Amplification, Microscopy, Culture, and PCR for Diagnosis of Pulmonary Tuberculosis. *Jpn J Infect Dis*. 2020;advpub. doi:10.7883/yoken.JJID.2019.335
3. Wang Z, Sun H, Ren Z, Xue B, Lu J, Zhang H. Feasibility and Performance of Loop-Mediated Isothermal Amplification Assay in the Diagnosis of Pulmonary Tuberculosis in Decentralized Settings in Eastern China. *BioMed Res Int*. 2019;2019. doi:10.1155/2019/6845756
4. Cudahy P, Shenoï S. Diagnostics for pulmonary tuberculosis. *Postgrad Med J*. 2016;92: 187–193. doi:10.1136/postgradmedj-2015-133278
5. Shi J, Dong W, Ma Y, Liang Q, Shang Y, Wang F, et al. GeneXpert MTB/RIF Outperforms Mycobacterial Culture in Detecting Mycobacterium tuberculosis from Salivary Sputum. In: *BioMed Research International* [Internet]. 2018 [cited 12 Dec 2019]. Available: <https://www.hindawi.com/journals/bmri/2018/1514381/>
6. Ho J, Marks GB, Fox GJ. The impact of sputum quality on tuberculosis diagnosis: a systematic review. *Int J Tuberc Lung Dis Off J Int Union Tuberc Lung Dis*. 2015;19: 537–544. doi:10.5588/ijtld.14.0798
7. Yoon SH, Lee NK, Yim JJ. Impact of sputum gross appearance and volume on smear positivity of pulmonary tuberculosis: a prospective cohort study. *BMC Infect Dis*. 2012;12: 172. doi:10.1186/1471-2334-12-172
8. Hirooka T, Higuchi T, Tanaka N, Ogura T. [The value of proper sputum collection instruction in detection of acid-fast bacillus]. *Kekkaku*. 2004;79: 33–37.
9. Sicsú AN, Salem JI, Fujimoto LBM, Gonzales RIC, Cardoso M do S de L, Palha PF. Educational intervention for collecting sputum for tuberculosis: a quasi-experimental study 1. *Rev Lat Am Enfermagem*. 2016;24. doi:10.1590/1518-8345.0363.2703
