# Supplementary material for: Pragmatic accuracy of an in-house loop-mediated isothermal amplification (LAMP) for diagnosis of pulmonary tuberculosis in a Thai community hospital
Source: PubMed Central journal article supplement (PMC7377475; doi:10.1371/journal.pone.0236496), 2020-07-23
Supplement: pone.0236496.s007.pdf [file pone.0236496.s007.pdf]

# PLOS ONE

## Pragmatic accuracy of an in-house loop-mediated isothermal amplification (LAMP) for diagnosis of pulmonary tuberculosis in a Thai community hospital

--Manuscript Draft--

|                               |                                                                                                                                                                                                                                                                                                                                                                                                                                                                                                                                                                                                                                                                                                                                                                                                                                                                                                                                                                                                                                                                                                                                                                                                                                                                                                                                                                                                                                                                                                                                                                                                                                                                                                                                                                                                                                                                                                                                                                                                                |
|-------------------------------|----------------------------------------------------------------------------------------------------------------------------------------------------------------------------------------------------------------------------------------------------------------------------------------------------------------------------------------------------------------------------------------------------------------------------------------------------------------------------------------------------------------------------------------------------------------------------------------------------------------------------------------------------------------------------------------------------------------------------------------------------------------------------------------------------------------------------------------------------------------------------------------------------------------------------------------------------------------------------------------------------------------------------------------------------------------------------------------------------------------------------------------------------------------------------------------------------------------------------------------------------------------------------------------------------------------------------------------------------------------------------------------------------------------------------------------------------------------------------------------------------------------------------------------------------------------------------------------------------------------------------------------------------------------------------------------------------------------------------------------------------------------------------------------------------------------------------------------------------------------------------------------------------------------------------------------------------------------------------------------------------------------|
| <b>Manuscript Number:</b>     | PONE-D-20-00432R2                                                                                                                                                                                                                                                                                                                                                                                                                                                                                                                                                                                                                                                                                                                                                                                                                                                                                                                                                                                                                                                                                                                                                                                                                                                                                                                                                                                                                                                                                                                                                                                                                                                                                                                                                                                                                                                                                                                                                                                              |
| <b>Article Type:</b>          | Research Article                                                                                                                                                                                                                                                                                                                                                                                                                                                                                                                                                                                                                                                                                                                                                                                                                                                                                                                                                                                                                                                                                                                                                                                                                                                                                                                                                                                                                                                                                                                                                                                                                                                                                                                                                                                                                                                                                                                                                                                               |
| <b>Full Title:</b>            | Pragmatic accuracy of an in-house loop-mediated isothermal amplification (LAMP) for diagnosis of pulmonary tuberculosis in a Thai community hospital                                                                                                                                                                                                                                                                                                                                                                                                                                                                                                                                                                                                                                                                                                                                                                                                                                                                                                                                                                                                                                                                                                                                                                                                                                                                                                                                                                                                                                                                                                                                                                                                                                                                                                                                                                                                                                                           |
| <b>Short Title:</b>           | Diagnostic accuracy of an in-house LAMP for pulmonary TB                                                                                                                                                                                                                                                                                                                                                                                                                                                                                                                                                                                                                                                                                                                                                                                                                                                                                                                                                                                                                                                                                                                                                                                                                                                                                                                                                                                                                                                                                                                                                                                                                                                                                                                                                                                                                                                                                                                                                       |
| <b>Corresponding Author:</b>  | Phichayut Phinyo<br>Chiang Mai University<br>Chiang Mai, Chiang Mai THAILAND                                                                                                                                                                                                                                                                                                                                                                                                                                                                                                                                                                                                                                                                                                                                                                                                                                                                                                                                                                                                                                                                                                                                                                                                                                                                                                                                                                                                                                                                                                                                                                                                                                                                                                                                                                                                                                                                                                                                   |
| <b>Keywords:</b>              | Pulmonary Tuberculosis, In-House LAMP, Diagnosis, Sensitivity, Specificity                                                                                                                                                                                                                                                                                                                                                                                                                                                                                                                                                                                                                                                                                                                                                                                                                                                                                                                                                                                                                                                                                                                                                                                                                                                                                                                                                                                                                                                                                                                                                                                                                                                                                                                                                                                                                                                                                                                                     |
| <b>Abstract:</b>              | <p><b>Background:</b> To improve the quality of diagnosing pulmonary tuberculosis (TB), WHO recommends the use of rapid molecular testing as an alternative to conventional microscopic methods. Loop-mediated isothermal amplification assay (LAMP test) is a practical and cost-effective nucleic amplification technique. We evaluated the pragmatic accuracy of an in-house LAMP assay for the diagnosis of TB in a remote health care setting where an advanced rapid molecular test is not available.</p> <p><b>Methods:</b> A prospective diagnostic accuracy study was conducted. Patients with clinical symptoms suggestive of TB were consecutively enrolled from April to August 2016. Sputum samples were collected from each patient and were sent for microscopic examination (both acid-fast stain and fluorescence stain), in-house LAMP test, and TB culture.</p> <p><b>Results:</b> One hundred and seven patients with TB symptoms were used in the final analysis. This included 50 (46.7%) culture-positive TB patients and 57 (53.3%) culture-negative patients. The overall sensitivity of the in-house LAMP based on culture positivity was 88.8% (95/107) with a 95%CI of 81.2-94.1. The sensitivity was 90.9% (40/44) with a 95%CI of 78.3-97.5 for smear-positive, culture-positive patients, and was 16.7% (1/6) with a 95%CI of 0.4-64.1 for smear-negative, culture-positive patients. The overall sensitivity of the in-house LAMP test compared to smear microscopy methods were not significantly different (<math>p=0.375</math>). The specificity of the in-house LAMP based on non-TB patients (smear-negative, culture-negative) was 94.7% (54/57) with a 95%CI of 85.4-98.9.</p> <p><b>Conclusions:</b> The diagnostic accuracy of the in-house LAMP test in a community hospital was comparable to other previous reports in terms of specificity. The sensitivity of the in-house assay could be improved with better sputum processing and DNA extraction method.</p> |
| <b>Order of Authors:</b>      | <p>Sarawut Toonkomdang</p> <p>Phichayut Phinyo</p> <p>Benjawan Phetsuksiri</p> <p>Jayanton Patumanond</p> <p>Janisara Rudeeaneksin</p> <p>Wiphat Klayut</p>                                                                                                                                                                                                                                                                                                                                                                                                                                                                                                                                                                                                                                                                                                                                                                                                                                                                                                                                                                                                                                                                                                                                                                                                                                                                                                                                                                                                                                                                                                                                                                                                                                                                                                                                                                                                                                                    |
| <b>Response to Reviewers:</b> | <p>Response to Reviewers</p> <p>We want to thank both the editor and the reviewers for granting the opportunity to revise our manuscript for publication in the PLOS one journal. We hope that our responses and revisions would substantially improve the quality of our manuscript and would be qualified for publication in the journal. If there were any further questions or minor points to be addressed or elaborated, please let us know. We would be more than eager to make any further revision.</p> <p>Editor's comments</p> <p>Specific comments:</p>                                                                                                                                                                                                                                                                                                                                                                                                                                                                                                                                                                                                                                                                                                                                                                                                                                                                                                                                                                                                                                                                                                                                                                                                                                                                                                                                                                                                                                            |

1. Abstract and Tables: Change the format 95%CI to be consistent with the rest of the manuscript, for example “95%CI 78.3,97.5” should be “95%CI 78.3-97.5”.

• Changed as suggested.

2. Line 80, implicated has negative meaning, suggest changing to implemented.

• We modified the first two sentences as “As financial resources are usually limited in countries with high TB prevalence, a commercial TB-LAMP could still be unattainable. More affordable in-house LAMP assays were later developed and applied in several centers”.

3. Line 162 change M. tuberculosis to Mycobacterium tuberculosis since this is the first time you mentioned the bacteria. Also, all the “M.” need to be italicized in M. tuberculosis throughout the manuscript.

• Corrected as suggested.

4. Line 192 – 193, should the “smear-positive and culture-positive results” be “smear-positive and culture-negative results”?

• Corrected as suggested.

5. Line 243 – 246: These sentences need reference(s)

• We inserted some references to the two sentences as suggested.

Reviewer’s comments

Thank you to the authors for the revisions made. This is a much better paper to present what is important work. However, I still have a few concerns. These focus on clarification of the ‘in-house assay’ and the discussion. Additionally, I think a review of the paper by a medical writer or any strong English editor would boost the communication of the results enormously.

1. The paper needs to be reviewed in detail for grammar and English. Other than general tidiness, in a number of places, the intent of what the authors are saying is lost due to odd grammar choices. For the best readability and better reach for the research contained, a review of the writing is recommended. I have made a few notes and suggestions in specific places.

a. We corrected all of your English suggestions.

b. We also modified and re-written some of the sentences in the manuscript to improve the readability.

2. The difference in assays still needs to be clearer. An ‘in-house assay’ is one that is not performed from a kit. You refer to ‘the in-house’ LAMP assay a lot as if there is only one, which is not the case. There are many papers out there with different ‘in-house’ LAMP assays. From the introduction, it sounds like you are presenting the findings from an in-house assay you developed following the protocol presented in Pandey et al. If so, this needs to be stated very clearly. However, from the methods section, it does not necessarily sound like you are not following that protocol and that this is a unique in-house assay. Please clarify in the paper.

a. We made the modification and improved the clarity of our in-house LAMP method as suggested.

3. When discussing previous results and meta-analyses, it needs to be clear that these refer to ‘in-house LAMP assays’ and not ‘the in-house LAMP assay’ as they are not uniform.

a. Corrected as suggested.

4. Inclusion of ‘Accuracy’ in Table 2 is a bit odd, but it can be kept if it is defined in the statistical methods section.

a. It was pre-specified in the methods section.

5. The discussion has a lengthy discourse on the costs of Xpert vs LAMP. But there is no referencing of the studies that have costed these two in order to make a proper comparison. It feels quite unsupported.

a. We removed unsupported statements from the paragraph and make the paragraph more concise.

6. In the discussion, the authors state ‘No previous study had officially addressed the effect of sputum quality on the LAMP test’. I’m not sure this is true and would caution the authors not to make such a sweeping statement.

a. We removed the sentence out of the discussion section as suggested.

7. In the discussion, “Interestingly, it was revealed from our data that the proportion of smear-positive, LAMP-positive results was also significantly lower in salivary sputum than in mucous sputum (31.3% vs. 57.5%,  $p=0.009$  and 29.9% vs. 60.0%,  $p=0.003$ ,

|  |                                                                                                                                                                                                                                                                                                                                                                                                                                                                                                                                                                                                                                                                                                                                                                                                                                                                                                                                                                                                                                                                                                                                                                                                                                                                                                                                                                                                                                                                                                                                                       |
|--|-------------------------------------------------------------------------------------------------------------------------------------------------------------------------------------------------------------------------------------------------------------------------------------------------------------------------------------------------------------------------------------------------------------------------------------------------------------------------------------------------------------------------------------------------------------------------------------------------------------------------------------------------------------------------------------------------------------------------------------------------------------------------------------------------------------------------------------------------------------------------------------------------------------------------------------------------------------------------------------------------------------------------------------------------------------------------------------------------------------------------------------------------------------------------------------------------------------------------------------------------------------------------------------------------------------------------------------------------------------------------------------------------------------------------------------------------------------------------------------------------------------------------------------------------------|
|  | <p>respectively). Therefore, the sensitivity and accuracy of all tests, including LAMP, might be underestimated.” 1) Do not present new results in the discussion – these need to be included in the Results section first. 3) are these sensitivity? Specificity? Accuracy? 3) This is not an interpretation that makes sense. The sensitivity/specificity is reported based on the best sputum sample available from the patients – quality samples are difficult to obtain. You can instead interpret it as ‘Sensitivity and specificity would be improved if higher quality sputum is obtained’.</p> <p>a.We modified the content as suggested.<br/>b.We moved the findings to the results section.</p> <p>8.In general, the discussion needs to be revised to make only statements supported by the literature, the study, or a comparison of the two. Much of the discussion feels like the authors musings.</p> <p>a.We modified the whole discussion sections to be as objective as possible.</p> <p>9.In the discussion, I would suggest focusing on sensitivity and specificity and not accuracy as accuracy is not a common way of discussing or assessing diagnostic tests due to its difficulty of interpretation.</p> <p>a.Corrected as suggested.</p> <p>10.The references as displayed in the reference section aren’t quite right. In reference #1, instead of Lancet, the Journal is listed as Lancet Lond Engl which is not correct. This inclusion of a city occurs in reference #7 as well.</p> <p>a.Corrected as suggested.</p> |
|--|-------------------------------------------------------------------------------------------------------------------------------------------------------------------------------------------------------------------------------------------------------------------------------------------------------------------------------------------------------------------------------------------------------------------------------------------------------------------------------------------------------------------------------------------------------------------------------------------------------------------------------------------------------------------------------------------------------------------------------------------------------------------------------------------------------------------------------------------------------------------------------------------------------------------------------------------------------------------------------------------------------------------------------------------------------------------------------------------------------------------------------------------------------------------------------------------------------------------------------------------------------------------------------------------------------------------------------------------------------------------------------------------------------------------------------------------------------------------------------------------------------------------------------------------------------|

**Additional Information:**

| Question | Response |
|----------|----------|
|----------|----------|

|                                                                                                                                                                                                                                                                                                                                                                                                                                                                                                     |                                                                  |
|-----------------------------------------------------------------------------------------------------------------------------------------------------------------------------------------------------------------------------------------------------------------------------------------------------------------------------------------------------------------------------------------------------------------------------------------------------------------------------------------------------|------------------------------------------------------------------|
| <p><b>Financial Disclosure</b></p> <p>Enter a financial disclosure statement that describes the sources of funding for the work included in this submission. Review the <a href="#">submission guidelines</a> for detailed requirements. View published research articles from <a href="#">PLOS ONE</a> for specific examples.</p> <p>This statement is required for submission and <b>will appear in the published article</b> if the submission is accepted. Please make sure it is accurate.</p> | <p>The author(s) received no specific funding for this work.</p> |
|-----------------------------------------------------------------------------------------------------------------------------------------------------------------------------------------------------------------------------------------------------------------------------------------------------------------------------------------------------------------------------------------------------------------------------------------------------------------------------------------------------|------------------------------------------------------------------|

**Unfunded studies**

Enter: *The author(s) received no specific funding for this work.*

**Funded studies**

Enter a statement with the following details:

- Initials of the authors who received each award
- Grant numbers awarded to each author
- The full name of each funder
- URL of each funder website
- Did the sponsors or funders play any role in the study design, data collection and analysis, decision to publish, or preparation of the manuscript?
- **NO** - Include this sentence at the end of your statement: *The funders had no role in study design, data collection and analysis, decision to publish, or preparation of the manuscript.*
- **YES** - Specify the role(s) played.

\* typeset

**Competing Interests**

Use the instructions below to enter a competing interest statement for this submission. On behalf of all authors, disclose any [competing interests](#) that could be perceived to bias this work—acknowledging all financial support and any other relevant financial or non-financial competing interests.

This statement **will appear in the published article** if the submission is accepted. Please make sure it is accurate. View published research articles from [PLOS ONE](#) for specific examples.

The authors have declared that no competing interests exist.

**NO authors have competing interests**

Enter: *The authors have declared that no competing interests exist.*

**Authors with competing interests**

Enter competing interest details beginning with this statement:

*I have read the journal's policy and the authors of this manuscript have the following competing interests: [insert competing interests here]*

\* typeset

**Ethics Statement**

Enter an ethics statement for this submission. This statement is required if the study involved:

- Human participants
- Human specimens or tissue
- Vertebrate animals or cephalopods
- Vertebrate embryos or tissues
- Field research

Write "N/A" if the submission does not require an ethics statement.

General guidance is provided below. Consult the [submission guidelines](#) for detailed instructions. **Make sure that all information entered here is included in the Methods section of the manuscript.**

This study was approved by the Research Ethics Committee of Maesot General Hospital, The Ministry of Public Health (serial number 37/2015) and The Human Research Ethics Committee of Thammasat University, Faculty of Medicine (COA number 081/2016). The clinical samples used in this study were collected from all patients as routinely done. Informed consent was obtained from all patients prior to inclusion.

## Format for specific study types

### Human Subject Research (involving human participants and/or tissue)

- Give the name of the institutional review board or ethics committee that approved the study
- Include the approval number and/or a statement indicating approval of this research
- Indicate the form of consent obtained (written/oral) or the reason that consent was not obtained (e.g. the data were analyzed anonymously)

### Animal Research (involving vertebrate animals, embryos or tissues)

- Provide the name of the Institutional Animal Care and Use Committee (IACUC) or other relevant ethics board that reviewed the study protocol, and indicate whether they approved this research or granted a formal waiver of ethical approval
- Include an approval number if one was obtained
- If the study involved *non-human primates*, add *additional details* about animal welfare and steps taken to ameliorate suffering
- If anesthesia, euthanasia, or any kind of animal sacrifice is part of the study, include briefly which substances and/or methods were applied

### Field Research

Include the following details if this study involves the collection of plant, animal, or other materials from a natural setting:

- Field permit number
- Name of the institution or relevant body that granted permission

### Data Availability

Authors are required to make all data underlying the findings described fully available, without restriction, and from the time of publication. PLOS allows rare exceptions to address legal and ethical concerns. See the [PLOS Data Policy](#) and [FAQ](#) for detailed information.

Yes - all data are fully available without restriction

A Data Availability Statement describing where the data can be found is required at submission. Your answers to this question constitute the Data Availability Statement and **will be published in the article**, if accepted.

**Important:** Stating 'data available on request from the author' is not sufficient. If your data are only available upon request, select 'No' for the first question and explain your exceptional situation in the text box.

Do the authors confirm that all data underlying the findings described in their manuscript are fully available without restriction?

**Describe where the data may be found in full sentences. If you are copying our sample text, replace any instances of XXX with the appropriate details.**

- If the data are **held or will be held in a public repository**, include URLs, accession numbers or DOIs. If this information will only be available after acceptance, indicate this by ticking the box below. For example: *All XXX files are available from the XXX database (accession number(s) XXX, XXX).*
- If the data are all contained **within the manuscript and/or Supporting Information files**, enter the following: *All relevant data are within the manuscript and its Supporting Information files.*
- If neither of these applies but you are able to provide **details of access elsewhere**, with or without limitations, please do so. For example:

*Data cannot be shared publicly because of [XXX]. Data are available from the XXX Institutional Data Access / Ethics Committee (contact via XXX) for researchers who meet the criteria for access to confidential data.*

*The data underlying the results presented in the study are available from (include the name of the third party*

All relevant data are within the manuscript and its Supporting Information files.

|                                                                                                                                                                                                                                         |  |
|-----------------------------------------------------------------------------------------------------------------------------------------------------------------------------------------------------------------------------------------|--|
| <p><i>and contact information or URL).</i></p> <ul style="list-style-type: none"><li>• This text is appropriate if the data are owned by a third party and authors do not have permission to share the data.</li></ul> <p>* typeset</p> |  |
| Additional data availability information:                                                                                                                                                                                               |  |



1 **Pragmatic accuracy of an in-house loop-mediated isothermal amplification**  
2 **(LAMP) for diagnosis of pulmonary tuberculosis in a Thai community**  
3 **hospital**

4  
5 **Short title:** Diagnostic accuracy of an in-house LAMP for pulmonary TB

6  
7 Sarawut Toonkomdang<sup>1</sup>, Phichayut Phinyo<sup>2,3\*</sup>, Benjawan Phetsuksiri<sup>4</sup>,  
8 Jayanton Patumanond<sup>3</sup>, Janisara Rudeeaneksin<sup>4¶</sup>, Wiphat Klayut<sup>4¶</sup>

9  
10 <sup>1</sup> Department of Medical Technology, Maesot General Hospital, Tak, Thailand.

11 <sup>2</sup>Department of Family Medicine, Faculty of Medicine, Chiang Mai University, Chiang Mai,  
12 Thailand.

13 <sup>3</sup> Center for Clinical Epidemiology and Clinical Statistics, Faculty of Medicine, Chiang Mai  
14 University, Chiang Mai, Thailand.

15 <sup>4</sup> National Institute of Health, Department of Medical Sciences, Ministry of Public Health,  
16 Nonthaburi, Thailand.

17  
18 \*Corresponding author:

19 E-mail: phichayutphinyo@gmail.com (PP)

20 ¶These authors contributed equally to this work.

21

## 22 **Abstract**

23 **Background:** To improve the quality of diagnosing pulmonary tuberculosis (TB), WHO  
24 recommends the use of rapid molecular testing as an alternative to conventional microscopic  
25 methods. Loop-mediated isothermal amplification assay (LAMP test) is a practical and cost-  
26 effective nucleic amplification technique. We evaluated the pragmatic accuracy of an in-  
27 house LAMP assay for the diagnosis of TB in a remote health care setting where an advanced  
28 rapid molecular test is not available.

29 **Methods:** A prospective diagnostic accuracy study was conducted. Patients with clinical  
30 symptoms suggestive of TB were consecutively enrolled from April to August 2016. Sputum  
31 samples were collected from each patient and were sent for microscopic examination (both  
32 acid-fast stain and fluorescence stain), in-house LAMP test, and TB culture.

33 **Results:** One hundred and seven patients with TB symptoms were used in the final analysis.  
34 This included 50 (46.7%) culture-positive TB patients and 57 (53.3%) culture-negative  
35 patients. The overall sensitivity of the in-house LAMP based on culture positivity was 88.8%  
36 (95/107) with a 95%CI of 81.2-94.1. The sensitivity was 90.9% (40/44) with a 95%CI of  
37 78.3-97.5 for smear-positive, culture-positive patients, and was 16.7% (1/6) with a 95%CI of  
38 0.4-64.1 for smear-negative, culture-positive patients. The overall sensitivity of the in-house  
39 LAMP test compared to smear microscopy methods were not significantly different  
40 ( $p=0.375$ ). The specificity of the in-house LAMP based on non-TB patients (smear-negative,  
41 culture-negative) was 94.7% (54/57) with a 95%CI of 85.4-98.9.

42 **Conclusions:** The diagnostic accuracy of the in-house LAMP test in a community hospital  
43 was comparable to other previous reports in terms of specificity. The sensitivity of the in-  
44 house assay could be improved with better sputum processing and DNA extraction method.

45 **Keywords:** Pulmonary Tuberculosis, In-House LAMP, Diagnosis, Sensitivity, Specificity

46

## 47 **Introduction**

48 Tuberculosis (TB), an airborne communicable disease, has long been considered a significant  
49 threat to global public health. According to The World Health Organization (WHO), 10  
50 million people were newly infected with TB in 2018 [1]. The incidence and prevalence of TB  
51 vary greatly across the globe, 87% of total cases resided within 30 countries with a high TB  
52 burden. In Thailand, the incidence rate was 153 cases per 100,000 population in 2018. Early  
53 diagnosis and timely treatment is an essential component of The End TB Strategy endorsed  
54 by the WHO, aiming to end the global TB epidemic by the year 2035 [2]. However, TB is  
55 still underdiagnosed and undertreated, especially in resource-limited countries, due to the  
56 lack of highly sensitive and specific diagnostic tools which are usually expensive and require  
57 adequate infrastructure [1,3]. Novel diagnostic methods with enough simplicity and cost-  
58 effectiveness are therefore necessary to improve the accurate identification of TB patients in  
59 those resource-limited settings [3,4].

60

61 Molecular testing methods such as polymerase chain reaction (PCR) or Xpert MTB/RIF have  
62 been widely acknowledged as alternative tools to TB culture for the diagnosis of TB patients  
63 [3,5]. These nucleic amplification techniques were known for yielding rapid and accurate TB  
64 diagnosis. This would overcome the limitations of classical methods, insensitivity for smear  
65 microscopy, and lengthy incubation period for TB culture. However, several obstacles remain  
66 for the application of these molecular tests as point-of-care testing in community settings.  
67 This is because of their complexity to execute and substantial requirements for financial and  
68 personnel resources [3,6]. Loop-mediated isothermal amplification (LAMP) assay is another  
69 recently developed nucleic acid amplification technique. Unlike PCR, where the  
70 amplification of DNA fragment occurs in temperature-dependent steps, the reaction of LAMP

71 assay functions in isothermal or constant temperature conditions [7,8]. In 2016, WHO  
72 endorsed the use of commercial TB-LAMP assay (Eiken Chemical Co., Tokyo, Japan) as a  
73 replacement for smear microscopy for the diagnosis of TB [9]. TB-LAMP assay has a low  
74 cost per test, does not required advanced technological facilities, and can be routinely  
75 practiced in general hospital laboratories [6,10].

76

77 As financial resources are usually limited in countries with high TB prevalence, a commercial  
78 TB-LAMP could still be unattainable. More affordable in-house LAMP assays were later  
79 developed and applied in several centers [11–15]. However, it did require extra-training and  
80 skill of technicians to process the clinical specimens. In the past decades, several clinical  
81 studies and meta-analyses had evaluated the diagnostic accuracy of in-house LAMP tests for  
82 the diagnosis of pulmonary TB [14,16,17] (S1 Table). From the latest meta-analysis, the  
83 overall sensitivity and specificity of in-house LAMP was 93.0% (95%CI 88.9-95.7) and  
84 91.8% (95%CI 86.4-95.1), respectively [17]. One recent study in Thailand reported the  
85 sensitivity and the specificity of the in-house LAMP at 94.4% (95%CI 88.9-97.7) and 94.3%  
86 (95%CI 87.2-98.1), respectively [15]. However, the reported accuracy could be  
87 overestimated if it is assessed in qualified laboratories with highly skilled technicians and  
88 sufficient resources where molecular tests are usually available [17]. Therefore, this study  
89 aimed to evaluate the pragmatic accuracy of the in-house LAMP assay for the diagnosis of  
90 pulmonary TB in a community hospital of a developing country with a high TB burden.

91

## 92 **Materials and Methods**

### 93 **Ethics Statement**

94 This study was approved by the Research Ethics Committee of Maesot General Hospital, The  
95 Ministry of Public Health (serial number 37/2015) and The Human Research Ethics  
96 Committee of Thammasat University, Faculty of Medicine (COA number 081/2016). The  
97 clinical samples used in this study were collected from all patients as routinely done.  
98 Informed consent was obtained from all patients prior to inclusion.

### 99 **Setting**

100 The study was performed in Maesot General Hospital, a large-sized community hospital with  
101 365 in-patient beds. It is located in Maesot District, Tak Province, which shares the border  
102 with Myanmar. The hospital provides standard health care to both Thai and non-Thai patients  
103 (Burmese immigrants and ethnic minorities). According to the Health Data Center, the  
104 Ministry of Public Health, in Thailand, the incidence rate of pulmonary TB in Maesot was  
105 351 per 100,000 in 2019. The health care system of the hospital is considered rural. Maesot  
106 hospital has its reference laboratory with biosafety cabinet infrastructure, BSC class II. There  
107 are four lab technicians and one lab assistant within each working shift. Power generator (350  
108 kW) and UPS (2.7 kW) were available in case of power outages, which was infrequent. The  
109 median LAMP test workload per day was 6 (range 4-10).

### 110 **Study Design**

111 This prospective diagnostic accuracy research was conducted from April to August 2016.  
112 Adult patients aged more than 15 years old with symptoms indicative of pulmonary TB  
113 (coughing for more than two weeks with or without hemoptysis) and no history of TB were  
114 consecutively enrolled regardless of nationality status. Patients with previously documented

115 TB history or patients with two contaminated cultures or missing cultures were excluded  
116 from the study.

## 117 **Methods**

118 All patients were given three sealed containers for the collection of morning sputum  
119 specimens. Only one sputum specimen with adequate sputum containing both mucoid or  
120 mucopurulent characters and a sample volume of more than 3 ml was selected in all  
121 investigation procedures. Specimens were sent for smear microscopy with conventional acid-  
122 fast bacilli (AFB) staining with Ziehl-Neelsen technique and fluorescence acid-fast staining  
123 with Auramine O solution. The smear-positive case was defined according to WHO  
124 definitions as the presence of at least two smears of scanty grade, or one or more smears of  
125 1+ or more. A smear negative case was conversely defined.

### 126 **Sputum decontamination and culture examination**

127 For the sputum decontamination process, the collected samples and 2% N-Acetyl-L-cysteine  
128 (NALC) NaOH were poured into a 50 ml sterile centrifuge tube in an equal proportion. The  
129 specimens were subsequently mixed by vortexing for 30 seconds and left at room  
130 temperature (20-25°C) for 15 minutes. Then, the test tubes were filled with phosphate buffer  
131 saline (pH 6.8) until the volume reached the level of 50 ml. The samples were put in a high-  
132 speed refrigerated centrifuge at 3,000 g for 20 minutes. Next, the supernatants were poured  
133 off, leaving the tube with decontaminated sputum samples. Finally, a drop (1 ml) of  
134 phosphate buffer saline (pH 6.8) was used for resuspension of the specimens.

135 For TB culture, the reference test, we performed both conventional culture method on L-J  
136 (Lowenstein-Jensen) medium and BBL MGIT 960 (mycobacterial growth indicator tube)  
137 culture method. The culture media were inoculated with processed sputum specimens and  
138 incubated at 35 to 37°C and monitored weekly for growth until 8 weeks. The sputum samples

139 were considered as “culture-positive” if growth was detected in either of L-J or MGIT  
140 culture, regardless of the smear status. If growth was not detected in neither of the culture  
141 methods and both microscopy results were negative, the samples were considered as “culture-  
142 negative” or “non-TB patients”. Patients with smear-positive and culture-negative, which  
143 were generally considered as probable TB, were excluded from the analysis. Both smear  
144 microscopy and culture methods were performed according to the standard protocols [18].

### 145 **In-house LAMP test**

146 The LAMP test consists of three steps as follows: DNA extraction, isothermal amplification,  
147 and visual interpretation with fluorescence. In this study, we followed the TB Fast AMP  
148 technique, which was developed by the National Institute of Health of Thailand and was  
149 described in our previous studies [13,15,19]. The procedures were described as follow. Flexi  
150 Gene<sup>®</sup> DNA Kit (Qiagen co., USA) and Protenase K Kit (Qiagen co., USA) were used for  
151 DNA extraction. Six primers were used for the recognition of eight distinct regions on the  
152 16S ribosomal RNA gene of *M. tuberculosis*. Each single LAMP reaction includes 12 µl of  
153 TB-Fast AMP mixture (FastAMP master mix includes 2 µl 10Xbuffer, 4 µl 2mM dNTPs, 3.2  
154 µl 5M betaine, 1.2 µl 100 mM MgSO<sub>4</sub>, 1.6 µl primer mixture), 1 µl *Bst* DNA polymerase  
155 enzyme (New England Biolabs, Ipswich MA, USA), 1 µl fluorescent detection reagent (FDR;  
156 Eiken Chemical Tokyo, Japan) and 6 µl of extracted DNA samples. Amplification of reaction  
157 mixture was performed in the heating blocks at 65°C for 60 minutes, then examined directly  
158 by visual observation. The LAMP assay was considered “positive” if the color of the reaction  
159 mixture changed from orange to green, or fluorescence was directly observed with the naked  
160 eyes. The test was considered “negative” if the color of the mixture remained unchanged. For  
161 quality control, positive control (test tube with *Mycobacterium tuberculosis* genetic  
162 materials) and negative control (test tube without *M. tuberculosis* genetic materials) were  
163 included in all runs.

## 164 **Statistical Analysis**

165 We used Fisher's exact probability test for comparison of differences in independent  
166 proportions and Student's t-test for two independent means. The sensitivity, specificity,  
167 positive predictive values (PPV), negative predictive values (NPV), and positive and negative  
168 likelihood ratios were calculated and reported with its 95% confidence interval. The 95%  
169 confidence interval were estimated using the Clopper Pearson binomial exact method. The  
170 comparison of sensitivity, specificity, and overall test accuracy between the LAMP test and  
171 smear microscopy methods was performed with McNemar's exact probability test. Pairwise  
172 testing to compare the specificity between the LAMP test and the smear microscopy methods  
173 was not performed as the specificity of the latter was affected by incorporation bias and  
174 would not be comparable to the in-house LAMP. The inter-rater reliability and the correlation  
175 of the LAMP test with smear microscopy methods was analyzed with Kappa's statistics and  
176 Spearman's rank correlation, respectively. P-values of less than 0.05 were considered  
177 statistically significant. All statistical analyses were done using Stata version 16 (StataCorp,  
178 Texas).

179



## 180 **Results**

181 A total of 120 patients to be evaluated for TB were consecutively included from April to  
182 August 2016. Three patients with two contaminated cultures, two patients who subsequently  
183 were detected as previously documented TB cases, and eight patients who had smear-positive  
184 and culture-negative results were excluded from the analysis; only 107 patients remained in  
185 the study (Fig. 1). Most of the included patients were male (60% vs. 40%) with a mean age of  
186 47. Fifty (46.7%) were culture-positive TB patients and 57 (53.3%) were culture-negative  
187 patients. The baseline demographic data between culture-positive and culture-negative  
188 patients were comparable (Table 1). For clinical characteristics, the presence of cavitary  
189 lesions on chest radiographs and the character of collected sputum was statistically different.  
190 Culture-positive TB patients had higher proportion of cavitary lesions (14.0% vs. 1.8%,  
191  $p=0.024$ ) and mucous sputum specimen (52.0% vs 24.6%,  $p=0.005$ ) than those with negative  
192 TB culture. The proportion of patients with salivary sputum was significantly lower than  
193 mucous sputum in both smear-positive and LAMP-positive results (31.3% vs. 57.5%,  
194  $p=0.009$  and 29.9% vs. 60.0%,  $p=0.003$ , respectively).

195

196

197 **Table 1. Demographic and clinical characteristics of the patients by TB culture status**

| Characteristics            | TB Culture Positive | TB Culture Negative | P-Value |
|----------------------------|---------------------|---------------------|---------|
|                            | (S+ or S-, C+)      | (S-, C-)            |         |
|                            | n=50 (46.7%)        | n=57 (53.3%)        |         |
| <b>Gender</b>              |                     |                     |         |
| Male                       | 30 (60.0)           | 36 (63.2)           | 0.842   |
| Female                     | 20 (40.0)           | 21 (36.8)           |         |
| <b>Nationality</b>         |                     |                     |         |
| Thai                       | 28 (56.0)           | 21 (36.8)           | 0.054   |
| Non-Thai                   | 22 (44.0)           | 36 (63.2)           |         |
| Age (year, mean±SD)        | 48.7±17.4           | 45.8±18.7           | 0.408   |
| <b>Chest radiographs</b>   |                     |                     |         |
| Without cavitary lesions   | 43 (86.0)           | 56 (98.2)           | 0.024   |
| With cavitary lesions      | 7 (14.0)            | 1 (1.8)             |         |
| <b>Character of sputum</b> |                     |                     |         |
| Salivary                   | 24(48.0)            | 43 (75.4)           | 0.005   |
| Mucous                     | 26 (52.0)           | 14 (24.6)           |         |

198 Abbreviations: TB, tuberculosis; C, culture (+ positive or – negative); S, smear microscopy (+ positive or – negative); SD,  
199 standard deviation.

200

201 **Fig. 1. Study flow diagram of patient enrollment and results of index and reference test**  
202 **based on culture result**

203

204

205 The overall sensitivity of the LAMP test was 82.0% (95%CI 68.6-91.4), whereas the  
206 sensitivity in smear-positive, culture-positive patients and smear-negative, culture-positive  
207 was 90.9% (95%CI 78.3-97.5) and 16.7% (95%CI 0.4-64.1), respectively. The overall  
208 sensitivity of both the AFB and the fluorescence stain was slightly higher than that of the  
209 LAMP test; however, the differences were non-significant (Table 2). The specificity, positive  
210 predictive value, and negative predictive value of the LAMP test was 94.7% (95%CI 85.4-  
211 98.9), 93.2% (95%CI 81.3-98.6), and 85.7% (95%CI 74.6-93.3), respectively. The positive  
212 and negative likelihood ratios of the LAMP test was 15.6 (95%CI 4.47-82.12) and 0.19  
213 (95%CI 0.08-0.44), respectively. The accuracy measures for the diagnosis of TB cases were  
214 shown to vary across different test methods (LAMP test, AFB stain, and fluorescence stain),  
215 the differences were without statistical significance (Table 2).

216 LAMP test results were highly correlated with those of AFB and fluorescence stain  
217 (Spearman's rho 0.85, 95%CI 0.74-0.95,  $p < 0.001$ ) in the diagnosis of culture-positive TB  
218 cases (Table 3). The in-house LAMP also showed substantial to an almost perfect agreement  
219 with both microscopy methods in the diagnosis of culture-positive cases (Kappa 0.85, 95%CI  
220 0.74-0.95,  $p < 0.001$ ) (Table 3).

221

222 **Table 2. Diagnostic accuracy of the in-house LAMP test, AFB stain, and Fluorescence**

223 **stain.**

| Method                              | Sensitivity% (95% CI), no. corrects |                            |                              |                              | Specificity%                 | Accuracy%             | PPV%<br>(95% CI)    | NPV<br>(95% CI)    | LR+<br>(95% CI)  | LR-<br>(95% CI) |
|-------------------------------------|-------------------------------------|----------------------------|------------------------------|------------------------------|------------------------------|-----------------------|---------------------|--------------------|------------------|-----------------|
|                                     |                                     |                            |                              | (95% CI),                    | (95% CI),                    |                       |                     |                    |                  |                 |
|                                     | S+, C+                              | S-, C+                     | Any S, C+                    | no. corrects                 | no. corrects                 | no. corrects          |                     |                    |                  |                 |
|                                     | (n=44)                              | (n=6)                      | (n=50)                       | S-, C-<br>(n=57)             | (n=107)                      |                       |                     |                    |                  |                 |
| LAMP                                | 90.9<br>(78.3,97.5),<br>N=40        | 16.7<br>(0.4,64.1),<br>n=1 | 82.0<br>(68.6,91.4),<br>n=41 | 94.7<br>(85.4,98.9),<br>n=54 | 88.8<br>(81.2,94.1),<br>n=95 | 93.2<br>(81.3,98.6)   | 85.7<br>(74.6,93.3) | 15.6<br>(4.5,82.1) | 0.2<br>(0.1,0.4) |                 |
| AFB stain                           | -                                   | -                          | (75.7,95.5),<br>n=44         | (93.7,100.0),<br>n=57        | (88.2,97.9),<br>n=101        | 100.0<br>(93.7,100.0) | 90.5<br>(80.4,96.4) | -                  | -                |                 |
| Fluorescence stain                  | -                                   | -                          | (75.7,95.5),<br>n=44         | (93.7,100.0),<br>n=57        | (88.2,97.9),<br>n=101        | 100.0<br>(93.7,100.0) | 90.5<br>(80.4,96.4) | -                  | -                |                 |
| LAMP test vs.<br>AFB stain          |                                     |                            | P=0.375*                     | P=0.250*                     | P=1.000*                     |                       |                     |                    |                  |                 |
| LAMP test vs.<br>Fluorescence stain |                                     |                            | P=0.375*                     | P=0.250*                     | P=1.000*                     |                       |                     |                    |                  |                 |

224 \*P-values from McNemar's Exact probability test

225 Abbreviations: AFB, acid fast bacilli; C, culture (+ positive or – negative); CI, confidence interval; LAMP, loop-mediated

226 isothermal amplification; LR+, positive likelihood ratio; LR-, negative likelihood ratio; no. correct, number correctly

227 identified; NPV, negative predictive value; PPV, positive predictive value; S, smear microscopy (+ positive or – negative).

228

229 **Table 3. Inter-rater reliability and diagnostic agreement between an in-house LAMP**  
 230 **test and AFB stain-fluorescence stain.**

| LAMP Test                | AFB Stain & Fluorescence stain |          |       |
|--------------------------|--------------------------------|----------|-------|
|                          | Positive                       | Negative | Total |
| Positive                 | 40                             | 4        | 44    |
| Negative                 | 4                              | 59       | 63    |
| Total                    | 44                             | 63       | 107   |
| Agreement (%)            | 92.5%                          |          |       |
| Kappa (95%CI, p-value)   | 0.85 (0.74-0.95, p<0.001)      |          |       |
| Spearman's rho (p-value) | 0.85 (0.74-0.95, p<0.001)      |          |       |

231 Abbreviations: LAMP, loop-mediated isothermal amplification; CI, confidence interval.

232

233

234

## 235 **Discussion**

236 This study has demonstrated the pragmatic diagnostic performance of our in-house LAMP  
237 assay in a remote hospital of a high TB burden country. The overall sensitivity was lower  
238 than the majority of the previous in-house LAMP studies [11,15,20–23]. Nonetheless, the  
239 specificity was comparable to other figures reported in the literature [11,12,15,21,22]. In  
240 comparison to microscopy methods (AFB and fluorescence stain), the in-house LAMP was  
241 inferior in terms of overall sensitivity. Based on the result of our study, we suggest that the  
242 in-house LAMP should not be a substitute to conventional smear methods, but should be  
243 done in parallel, which would result in a higher sensitivity with fewer false-negative TB  
244 cases.

245 In the past, several studies reported a higher sensitivity of in-house LAMP tests,  
246 ranging from 90.0 to 100.0% [11,15,20–25]. Most of these studies were reported from either  
247 university hospitals, TB-specialized centers or hospitals, or national TB-specialized  
248 laboratories, which were generally equipped with highly trained personnel and adequate  
249 infrastructural supports [17]. The overall sensitivity of our in-house LAMP was consistent  
250 with two previous studies from India and Zambia, which was 79.5% (95%CI 64.0-89.0) and  
251 81.4% (95%CI 71.6-89.0), respectively [12,16]. Although both studies were performed in  
252 university hospitals, the LAMP procedures were modified to suit local conditions, and  
253 sputum processing and DNA extraction were done with commercial kits. The higher  
254 sensitivity of the acid-fast stain and the fluorescence stain in our study could be explained by  
255 the high prevalence of TB, the absence of HIV patients or fewer patients with paucibacillary  
256 sputum, and the availability of skilled technicians [16,26–28]. Besides, specimen  
257 decontamination with concentrated NaOH decreases the amount of viable genetic materials  
258 for amplification, which could reduce the sensitivity of both the LAMP test and TB cultures.  
259 A lower concentration of NaOH (1-1.5%) or NaOH free methods during sample

260 decontamination may be suggested [16,29]. The sensitivity of the LAMP test in smear-  
261 negative specimens could not be accurately estimated in this study as there were too few  
262 smear-negative, culture-positive patients.

263 The overall specificity of the LAMP test was 94.7% (95%CI 85.4-98.9) for non-TB  
264 patients. This was in concordance with a recent meta-analysis, which reported pooled  
265 specificity of in-house LAMP tests of 91.8% (95%CI 86.4-95.1) [17]. However, the  
266 specificity of the in-house assays was lower than that of the Loopamp commercial kit, which  
267 was reported at 96.5% (95%CI 94.7-97.7). A false positive LAMP result in smear-positive  
268 cases was frequently encountered in routine practice, which could be explained by multiple  
269 factors such as higher temperature, higher humidity, suboptimal reagents volume, and  
270 crossover contamination [17,30]. For temperature, only available water bath was applied for  
271 temperature controls during LAMP procedures instead of a more stable dry heating block. A  
272 recent study suggested a high reaction volume of 30-35  $\mu$ l due to the risk of self-priming in  
273 concentrated reagents [30].

274 Currently, the WHO only endorses the use of two rapid molecular tests for the  
275 diagnosis of pulmonary TB, which were Xpert MTB/RIF and the commercialized TB-LAMP  
276 assay [9]. According to previous studies, both had shown comparable performance in smear-  
277 positive samples, but higher sensitivity was shown in Xpert MTB/RIF than in the LAMP test  
278 [6,12]. Xpert MTB/RIF has been endorsed for use in the diagnosis of TB in many countries,  
279 including Thailand [4,31]. However, only a portion of patients, excluding foreigners and  
280 ethnic minorities, could reimburse the cost for Xpert MTB/RIF due to the regulation stated by  
281 The National Health Security Office (NHSO). To better control the spread of TB, access to  
282 rapid diagnostic tools should be provided to all patients with symptoms suggestive of TB [3].  
283 Thus, a LAMP assay may be more applicable in terms of accessibility and affordability,  
284 especially in the decentralized areas [4,32].

285           However, there were some limitations to this study. First, the study size may not be  
286 substantial enough to provide the power required to detect a statistically significant difference  
287 between tests. Second, no patients with HIV infection were included during the study period,  
288 as HIV status could be influential to the diagnostic performance of both the smear  
289 microscopy and the LAMP test, especially in areas with a high prevalence of TB-HIV  
290 coinfection. Third, there was a higher proportion of salivary sputum than mucous sputum in  
291 this study. This could affect the diagnostic performance of both the index and the reference  
292 test [33]. Both the quality and quantity of sputum specimens were associated with the  
293 positivity of smear, molecular testing methods (Xpert MTB/RIF and PCR), and TB culture  
294 [34,35]. Thus, some patients with pulmonary TB might be classified as smear-negative,  
295 LAMP-negative, or even culture-negative cases. Sensitivity and specificity would be  
296 improved if higher quality sputum is obtained [36,37].

297           Finally, the use of routine TB culture as a reference standard might be inadequate, as  
298 some TB patients could be classified as not having TB [6]. With a higher quality reference  
299 standard, the sensitivity of the in-house LAMP should be increased when a portion of three  
300 remaining false-positive cases was re-classified as true-positive cases. Different culture media  
301 and techniques could be used in composite to achieve different performance characteristics  
302 [38]. In our study, two different culture techniques, L-J and MGIT, were used to increase the  
303 diagnostic rate of TB [39]. We also applied a strict diagnostic definition in calculating  
304 specificity by considering only patients with smear-negative and culture-negative results [40].

305

## 306 **Conclusions**

307 In conclusion, a LAMP test is a practical and affordable nucleic amplification technique for  
308 the diagnosis of pulmonary TB, which should be implemented in resource-limited settings  
309 where Xpert MTB/RIF is unavailable. The diagnostic accuracy of the in-hose LAMP was



310 similar to previous studies for specificity. To improve the test sensitivity, a better sputum  
311 processing and DNA extraction method is essential. The in-house LAMP test had lower  
312 sensitivity than smear microscopy. Therefore, a parallel examination of both smear  
313 microscopy and the in-house LAMP test is suggested to minimize the risk of false-negative  
314 results, especially in an endemic area.

315

## 316 **Acknowledgements**

317 The authors wish to acknowledge the contributions of all the medical and nursing staff of the  
318 TB clinic at Maesot hospital for their help in data collection, and all relevant personnel of  
319 The National Institute of Health, Department of Medical Science, The Ministry of Public  
320 Health for their technical advice and support.

321

## 322 **References**

- 323 1. World Health Organization. Global Tuberculosis Report 2018. World Health  
324 Organization; 2018.
- 325 2. Uplekar M, Weil D, Lonroth K, Jaramillo E, Lienhardt C, Dias HM, et al. WHO's new  
326 end TB strategy. *Lancet*. 2015;385: 1799–1801. doi:10.1016/S0140-6736(15)60570-0
- 327 3. Parsons LM, Somoskövi Á, Gutierrez C, Lee E, Paramasivan CN, Abimiku A, et al.  
328 Laboratory Diagnosis of Tuberculosis in Resource-Poor Countries: Challenges and  
329 Opportunities. *Clin Microbiol Rev*. 2011;24: 314. doi:10.1128/CMR.00059-10
- 330 4. Kim C-K, Cho EA, Shin DM, Choi SW, Shin SY. Comparative Evaluation of the Loop-  
331 Mediated Isothermal Amplification Assay for Detecting Pulmonary Tuberculosis. *Ann*  
332 *Lab Med*. 2018;38: 119–124. doi:10.3343/alm.2018.38.2.119
- 333 5. Eddabra R, Ait Benhassou H. Rapid molecular assays for detection of tuberculosis.  
334 *Pneumonia*. 2018;10. doi:10.1186/s41479-018-0049-2
- 335 6. Shete PB, Farr K, Strnad L, Gray CM, Cattamanchi A. Diagnostic accuracy of TB-  
336 LAMP for pulmonary tuberculosis: a systematic review and meta-analysis. *BMC Infect*  
337 *Dis*. 2019;19: 268. doi:10.1186/s12879-019-3881-y
- 338 7. Notomi T, Okayama H, Masubuchi H, Yonekawa T, Watanabe K, Amino N, et al.  
339 Loop-mediated isothermal amplification of DNA. *Nucleic Acids Res*. 2000;28: e63.
- 340 8. Yan L, Xiao H, Zhang Q. Systematic review: Comparison of Xpert MTB/RIF, LAMP  
341 and SAT methods for the diagnosis of pulmonary tuberculosis. *Tuberculosis*. 2016;96:  
342 75–86. doi:10.1016/j.tube.2015.11.005
- 343 9. The Use of Loop-Mediated Isothermal Amplification (TB-LAMP) for the Diagnosis of  
344 Pulmonary Tuberculosis: Policy Guidance. Geneva: World Health Organization; 2016.  
345 Available: <http://www.ncbi.nlm.nih.gov/books/NBK384520/>
- 346 10. Sohn H, Puri L, Nguyen NAT, Van't Hoog AH, Nguyen VAT, Nliwasa M, et al. Cost  
347 and affordability analysis of TB-LAMP and Xpert MTB/RIF assays as routine  
348 diagnostic tests in peripheral laboratories in Malawi and Vietnam. *J Glob Health Sci*.  
349 2019;1: e22. doi:10.35500/jghs.2019.1.e22
- 350 11. Pandey BD, Poudel A, Yoda T, Tamaru A, Oda N, Fukushima Y, et al. Development of  
351 an in-house loop-mediated isothermal amplification (LAMP) assay for detection of  
352 *Mycobacterium tuberculosis* and evaluation in sputum samples of Nepalese patients. *J*  
353 *Med Microbiol*. 2008;57: 439–443. doi:10.1099/jmm.0.47499-0
- 354 12. Habeenzu C, Nakajima C, Solo E, Bwalya P, Kajino K, Miller M, et al. Evaluation of  
355 in-house loop-mediated isothermal amplification for tuberculosis diagnosis compared  
356 with Xpert MTB/RIF. *J Infect Dev Ctries*. 2017;11: 440–444. doi:10.3855/jidc.7730
- 357 13. Rudeeaneksin J. Rapid Detection of *Mycobacterium Tuberculosis* Complex in Sputum  
358 and in Culture Growth by LAMP Test. *J Health Sci*. 2017;19: 300–310.

- 359 14. Rudeeaneksin J, Bunchoo S, Srisungngam S, Sawanpanyalert P, Chamnangrom S,  
360 Kamolwat A, et al. Rapid identification of *Mycobacterium tuberculosis* in BACTEC  
361 MGIT960 cultures by in-house loop-mediated isothermal amplification. *Jpn J Infect*  
362 *Dis.* 2012;65: 306–311. doi:10.7883/yoken.65.306
- 363 15. Phetsuksiri B, Rudeeaneksin J, Srisungngam S, Bunchoo S, Klayut W, Nakajima C, et  
364 al. Comparison of Loop-Mediated Isothermal Amplification, Microscopy, Culture, and  
365 PCR for Diagnosis of Pulmonary Tuberculosis. *Jpn J Infect Dis.* 2020.  
366 doi:10.7883/yoken.jjid.2019.335
- 367 16. George G, Mony P, Kenneth J. Comparison of the Efficacies of Loop-Mediated  
368 Isothermal Amplification, Fluorescence Smear Microscopy and Culture for the  
369 Diagnosis of Tuberculosis. *PLoS ONE.* 2011;6. doi:10.1371/journal.pone.0021007
- 370 17. Nagai K, Horita N, Yamamoto M, Tsukahara T, Nagakura H, Tashiro K, et al.  
371 Diagnostic test accuracy of loop-mediated isothermal amplification assay for  
372 *Mycobacterium tuberculosis*: systematic review and meta-analysis. *Sci Rep.* 2016;6:  
373 39090. doi:10.1038/srep39090
- 374 18. Kent PT. *Public Health Mycobacteriology: A Guide for the Level III Laboratory.* U.S.  
375 Department of Health and Human Services, Public Health Service, Centers for Disease  
376 Control; 1985.
- 377 19. Phetsuksiri B, Rudeeaneksin J, Srisungngam S, Bunchoo S, Roienthong D, Mukai T, et  
378 al. Applicability of in-house loop-mediated isothermal amplification for rapid  
379 identification of *Mycobacterium tuberculosis* complex grown on solid media. *Jpn J*  
380 *Infect Dis.* 2013;66: 249–251. doi:10.7883/yoken.66.249
- 381 20. Sethi SK, Singh S, Dhatwalia SK, Yadav R, Mewara A, Singh M, et al. Evaluation of  
382 In- House Loop- Mediated Isothermal Amplification (LAMP) Assay for Rapid  
383 Diagnosis of *M. tuberculosis* in Pulmonary Specimens. *J Clin Lab Anal.* 2013;27: 272–  
384 276. doi:10.1002/jcla.21596
- 385 21. Rafati A, Gill P. Microfluidic method for rapid turbidimetric detection of the DNA of  
386 *Mycobacterium tuberculosis* using loop-mediated isothermal amplification in capillary  
387 tubes. *Microchim Acta.* 2015;182: 523–530. doi:10.1007/s00604-014-1354-y
- 388 22. Poudel A, Pandey BD, Lekhak B, Rijal B, Sapkota BR, Suzuki Y. Clinical profiling and  
389 use of loop-mediated isothermal amplification assay for rapid detection of  
390 *Mycobacterium tuberculosis* from sputum. *Kathmandu Univ Med J KUMJ.* 2009;7:  
391 109–114. doi:10.3126/kumj.v7i2.2701
- 392 23. Lee M-F, Chen Y-H, Peng C-F. Evaluation of reverse transcription loop-mediated  
393 isothermal amplification in conjunction with ELISA-hybridization assay for molecular  
394 detection of *Mycobacterium tuberculosis*. *J Microbiol Methods.* 2009;76: 174–180.  
395 doi:10.1016/j.mimet.2008.10.005
- 396 24. Li Y, Shi L, Pan A, Cao W, Chen X, Meng H, et al. Evaluation of real-time loop-  
397 mediated isothermal amplification (RealAmp) for rapid detection of *Mycobacterium*  
398 *tuberculosis* from sputum samples. *J Microbiol Methods.* 2014;104: 55–58.  
399 doi:10.1016/j.mimet.2014.06.011

- 400 25. Kohan L, Shahhosseiny MH, Razavi MR, Parivar K, Moslemi E, Werngren J.  
401 Evaluation of loop mediated isothermal amplification for diagnosis of *Mycobacterium*  
402 *tuberculosis* complex in clinical samples. *Afr J Biotechnol.* 2011;10: 5096–5101.  
403 doi:10.4314/ajb.v10i26.
- 404 26. Pandey BD, Poudel A, Yoda T, Tamaru A, Oda N, Fukushima Y, et al. Development of  
405 an in-house loop-mediated isothermal amplification (LAMP) assay for detection of  
406 *Mycobacterium tuberculosis* and evaluation in sputum samples of Nepalese patients. *J*  
407 *Med Microbiol.* 2008;57: 439–443. doi:10.1099/jmm.0.47499-0
- 408 27. Pathak D, Chakravorty S, Hanif M, Tyagi JS. Lysis of tubercle bacilli in fresh and  
409 stored sputum specimens: implications for diagnosing tuberculosis in stored and  
410 paucibacillary specimens by PCR. *BMC Microbiol.* 2007;7: 83. doi:10.1186/1471-2180-  
411 7-83
- 412 28. Shea YR, Davis JL, Huang L, Kovacs JA, Masur H, Mulindwa F, et al. High Sensitivity  
413 and Specificity of Acid-Fast Microscopy for Diagnosis of Pulmonary Tuberculosis in an  
414 African Population with a High Prevalence of Human Immunodeficiency Virus. *J Clin*  
415 *Microbiol.* 2009;47: 1553–1555. doi:10.1128/JCM.00348-09
- 416 29. Pham TH, Peter J, Mello FCQ, Parraga T, Lan NTN, Nabeta P, et al. Performance of the  
417 TB-LAMP diagnostic assay in reference laboratories: Results from a multicentre study.  
418 *Int J Infect Dis IJID Off Publ Int Soc Infect Dis.* 2018;68: 44–49.  
419 doi:10.1016/j.ijid.2018.01.005
- 420 30. Gray CM, Katamba A, Narang P, Giraldo J, Zamudio C, Joloba M, et al. Feasibility and  
421 Operational Performance of Tuberculosis Detection by Loop-Mediated Isothermal  
422 Amplification Platform in Decentralized Settings: Results from a Multicenter Study. *J*  
423 *Clin Microbiol.* 2016;54: 1984–1991. doi:10.1128/JCM.03036-15
- 424 31. Pai M, Flores LL, Pai N, Hubbard A, Riley LW, Colford JM. Diagnostic accuracy of  
425 nucleic acid amplification tests for tuberculous meningitis: a systematic review and  
426 meta-analysis. *Lancet Infect Dis.* 2003;3: 633–643. doi:10.1016/s1473-3099(03)00772-  
427 2
- 428 32. Geojith G, Dhanasekaran S, Chandran SP, Kenneth J. Efficacy of loop mediated  
429 isothermal amplification (LAMP) assay for the laboratory identification of  
430 *Mycobacterium tuberculosis* isolates in a resource limited setting. *J Microbiol Methods.*  
431 2011;84: 71–73. doi:10.1016/j.mimet.2010.10.015
- 432 33. Shi J, Dong W, Ma Y, Liang Q, Shang Y, Wang F, et al. GeneXpert MTB/RIF  
433 Outperforms *Mycobacterium* Culture in Detecting *Mycobacterium tuberculosis* from  
434 Salivary Sputum. In: *BioMed Research International* [Internet]. 2018 [cited 12 Dec  
435 2019]. Available: <https://www.hindawi.com/journals/bmri/2018/1514381/>
- 436 34. Ho J, Marks GB, Fox GJ. The impact of sputum quality on tuberculosis diagnosis: a  
437 systematic review. *Int J Tuberc Lung Dis Off J Int Union Tuberc Lung Dis.* 2015;19:  
438 537–544. doi:10.5588/ijtld.14.0798

- 439 35. Yoon SH, Lee NK, Yim JJ. Impact of sputum gross appearance and volume on smear  
440 positivity of pulmonary tuberculosis: a prospective cohort study. *BMC Infect Dis.*  
441 2012;12: 172. doi:10.1186/1471-2334-12-172
- 442 36. Hirooka T, Higuchi T, Tanaka N, Ogura T. [The value of proper sputum collection  
443 instruction in detection of acid-fast bacillus]. *Kekkaku.* 2004;79: 33–37.
- 444 37. Sicsú AN, Salem JI, Fujimoto LBM, Gonzales RIC, Cardoso M do S de L, Palha PF.  
445 Educational intervention for collecting sputum for tuberculosis: a quasi-experimental  
446 study 1. *Rev Lat Am Enfermagem.* 2016;24. doi:10.1590/1518-8345.0363.2703
- 447 38. Cudahy P, Shenoi S. Diagnostics for pulmonary tuberculosis. *Postgrad Med J.* 2016;92:  
448 187–193. doi:10.1136/postgradmedj-2015-133278
- 449 39. Kadioglu EE, Ucar EY, Araz O, Aktas E, Saglam L. A Comparison of Two Different  
450 Culture Methods for Use in the Diagnosis of Pulmonary Tuberculosis. *Eurasian J Med.*  
451 2014;46: 74–77. doi:10.5152/eajm.2014.19
- 452 40. Kaku T, Minamoto F, D’Meza R, Morose W, Boncy J, Bijou J, et al. Accuracy of  
453 LAMP-TB Method for Diagnosing Tuberculosis in Haiti. *Jpn J Infect Dis.* 2016;69:  
454 488–492. doi:10.7883/yoken.JJID.2015.519

455

456

457 **Supporting information**

458 **S1 Table. Review on diagnostic accuracy of in-house LAMP assays for diagnosis of**  
459 **pulmonary tuberculosis (DOCX)**

460 **S2 Table. LAMP minimal dataset (CSV)**

461

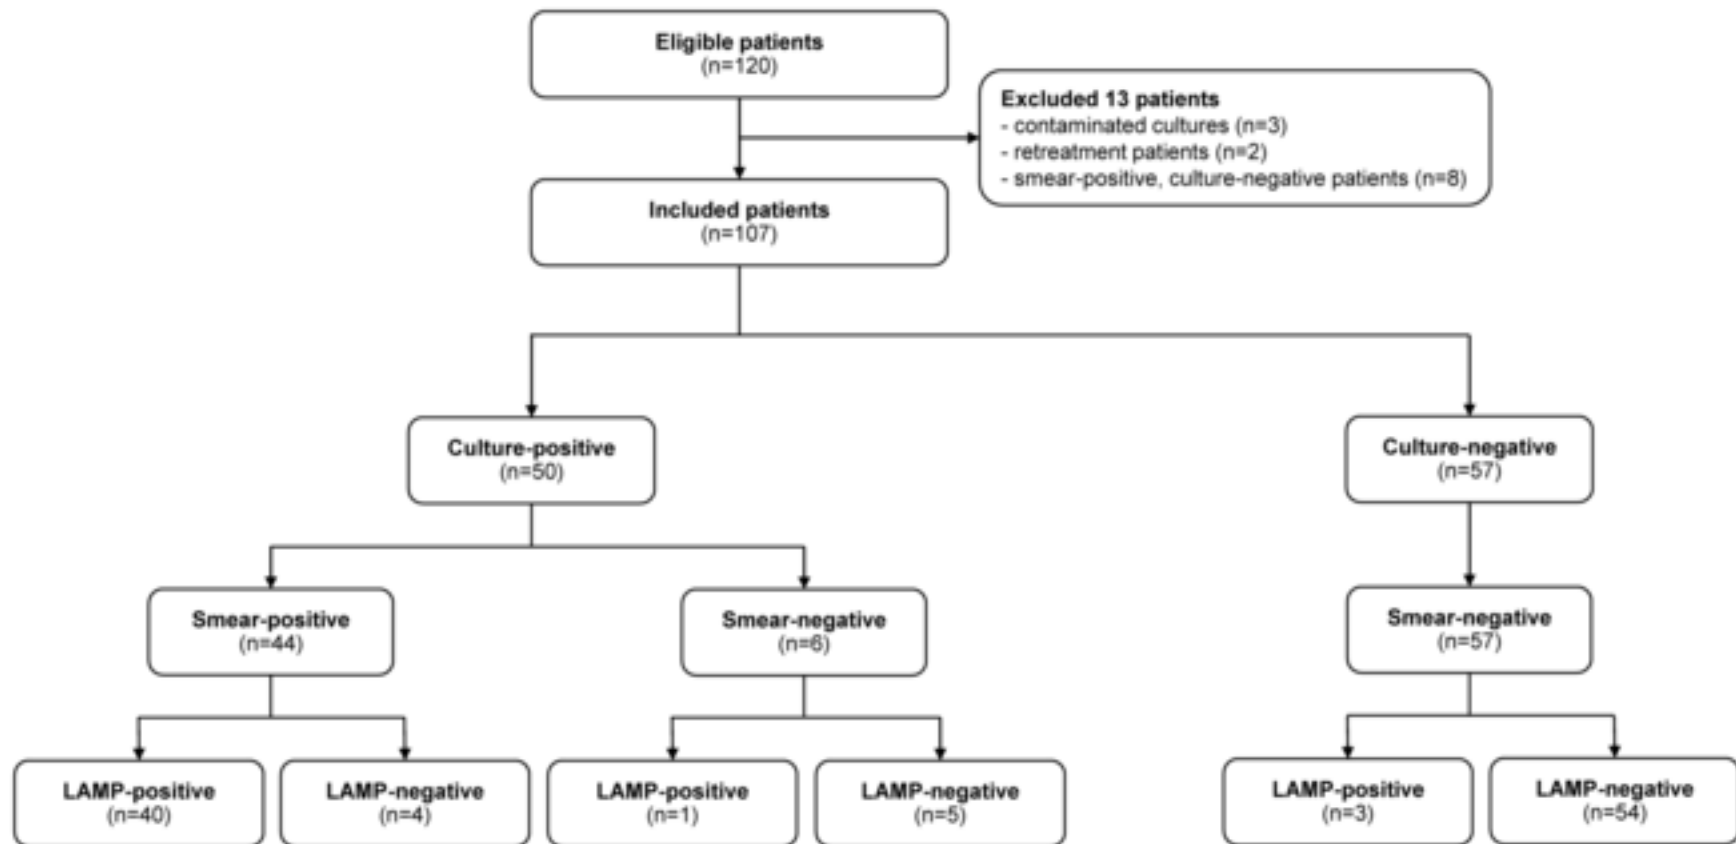

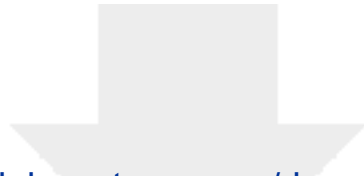

Click here to access/download  
**Supporting Information**  
S2 LAMP dataset.csv

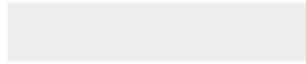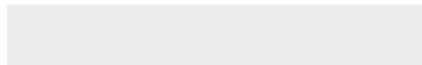





Click here to access/download  
**Supporting Information**  
Table S1.docx



1 **Pragmatic accuracy of an in-house loop-mediated isothermal amplification**  
2 **(LAMP) for diagnosis of pulmonary tuberculosis in a Thai community**  
3 **hospital**

4  
5 **Short title:** Diagnostic accuracy of an in-house LAMP for pulmonary TB

6  
7 Sarawut Toonkomdang<sup>1</sup>, Phichayut Phinyo<sup>2,3\*</sup>, Benjawan Phetsuksiri<sup>4</sup>,  
8 Jayanton Patumanond<sup>3</sup>, Janisara Rudeeaneksin<sup>4†</sup>, Wiphat Klayut<sup>4†</sup>

9  
10 <sup>1</sup> Department of Medical Technology, Maesot General Hospital, Tak, Thailand.

11 <sup>2</sup>Department of Family Medicine, Faculty of Medicine, Chiang Mai University, Chiang Mai,  
12 Thailand.

13 <sup>3</sup> Center for Clinical Epidemiology and Clinical Statistics, Faculty of Medicine, Chiang Mai  
14 University, Chiang Mai, Thailand.

15 <sup>4</sup> National Institute of Health, Department of Medical Sciences, Ministry of Public Health,  
16 Nonthaburi, Thailand.

17  
18 \*Corresponding author:

19 E-mail: phichayutphinyo@gmail.com (PP)

20 †These authors contributed equally to this work.

21

Formatted: No underline

## 22 Abstract

23 **Background:** To improve the quality of diagnosing pulmonary tuberculosis (TB), WHO  
24 recommends the use of rapid molecular testing as an alternative to conventional microscopic  
25 methods. Loop-mediated isothermal amplification assay (LAMP test) is a practical and cost-  
26 effective nucleic amplification technique. We evaluated the pragmatic accuracy of ~~the an~~ in-  
27 house LAMP assay for the diagnosis of TB in a remote health care setting where an advanced  
28 rapid molecular test is not available.

29 **Methods:** A prospective diagnostic accuracy study was conducted. Patients with clinical  
30 symptoms suggestive of TB were consecutively enrolled from April to August 2016. Sputum  
31 samples were collected from each patient and were sent for microscopic examination (both  
32 acid-fast stain and fluorescence stain), in-house LAMP test, and TB culture.

33 **Results:** One hundred and seven patients with TB symptoms were used in the final analysis.  
34 This included 50 (46.7%) culture-positive TB patients and 57 (53.3%) culture-negative  
35 patients. The overall sensitivity of the in-house LAMP based on culture positivity was 88.8%  
36 ~~(95/107) (with a 95% CI of 81.2–94.1)~~. The sensitivity was 90.9% ~~(40/44) (with a 95% CI of~~  
37 ~~78.3–97.5)~~ for smear-positive, culture-positive patients, and was 16.7% ~~(1/6) with a (95% CI~~  
38 ~~of 0.4–64.1)~~ for smear-negative, culture-positive patients. The overall sensitivity ~~and~~  
39 ~~accuracy~~ of the in-house LAMP test compared to smear microscopy methods were not  
40 significantly different ( $p=0.375$  ~~and  $p=1.000$ , respectively~~). The specificity of the in-house  
41 LAMP based on non-TB patients (smear-negative, culture-negative) was 94.7% ~~(54/57) with~~  
42 ~~a (95% CI of 85.4–98.9)~~.

43 **Conclusions:** The diagnostic accuracy of the in-house LAMP test in a community hospital  
44 was comparable to other previous reports in terms of specificity. The sensitivity of the in-  
45 house assay could be improved with better sputum processing and DNA extraction method.

46 **Keywords:** Pulmonary Tuberculosis, ~~in-house~~ [House](#) LAMP, Diagnosis, Sensitivity,

47 Specificity

48

## 49 Introduction

50 Tuberculosis (TB), an airborne communicable disease, has long been considered a significant  
51 threat to global public health. According to The World Health Organization (WHO), 10  
52 million people were newly infected with TB in 2018 [1]. ~~Although the~~The incidence and  
53 prevalence of TB vary greatly across the globe, 87% of total cases resided within 30 countries  
54 with a high TB burden. ~~In Thailand, including Thailand, where~~the incidence rate was 153  
55 cases per 100,000 population in 2018 [4]. Early diagnosis and timely treatment is an essential  
56 component of The End TB Strategy endorsed by the WHO, aiming to end the global TB  
57 epidemic by the year 2035 [2]. However, TB is still underdiagnosed and undertreated,  
58 especially in resource-limited ~~ing~~ countries, due to the lack of highly sensitive and specific  
59 diagnostic tools which are usually expensive and require adequate infrastructure [1,3]. Novel  
60 diagnostic methods with enough simplicity and cost-effectiveness ~~are~~ ~~are therefore necessary~~  
61 ~~to improve accurate identification of TB patients in these particular settings~~ ~~to be~~ ~~therefore~~  
62 ~~necessary to improve the accurate identification of TB patients~~ ~~used in those resource-limited~~  
63 ~~settings~~ [3,4].

64  
65 Molecular testing methods such as polymerase chain reaction (PCR) or Xpert MTB/RIF have  
66 been widely acknowledged as alternative tools ~~to TB culture~~ for the diagnosis of TB patients  
67 [3,5]. These nucleic amplification techniques were known for yielding rapid and accurate TB  
68 diagnosis, ~~which Thi~~ ould overcome the limitations of classical methods, insensitivity for  
69 smear microscopy, and lengthy incubation period for TB culture. However, several obstacles  
70 remain for the application of these molecular tests as point-of-care testing in community  
71 settings. ~~This is~~  because of their complexity ~~in execution~~ ~~to execute~~ and substantial  
72 requirements for financial and personnel resources [3,6]. Loop-mediated isothermal

Formatted: Space After: 8 pt

Field Code Changed

73 amplification (LAMP) assay is another recently developed nucleic acid amplification  
74 technique. Unlike PCR, where the amplification of DNA fragment occurs in temperature-  
75 dependent steps, the reaction of LAMP assay functions in isothermal or constant temperature  
76 conditions [7,8]. In 2016, WHO ~~suggested~~endorsed the use of commercial TB-LAMP assay  
77 (Eiken Chemical Co., Tokyo, Japan) as a replacement for smear microscopy for the diagnosis  
78 of TB ~~in patients with symptoms suggestive of TB~~ [9]. TB-LAMP assay has a low cost per  
79 test, does not required advanced technological facilities, and can be routinely practiced in  
80 general hospital laboratories [6,10].

81  
82 As financial resources are usually limited in countries with high TB prevalence, ~~setting up an~~  
83 ~~infrastructure to support the a~~ commercial TB-LAMP could still be unattainable. ~~A~~  
84 ~~more~~More affordable in-house LAMP ~~assays was were later~~ developed and applied in ~~2008~~  
85 ~~several centers [11–15][11]. The main advantage of the in-house assay was that it could be~~  
86 ~~implicated on the readily available infrastructure of any laboratory, even in the decentralized~~  
87 ~~one~~. However, it did require extra-training and skill of technicians to process the clinical  
88 specimens. In the past decades, several clinical studies and meta-analyses had evaluated the  
89 diagnostic accuracy of ~~the~~ in-house LAMP tests for the diagnosis of pulmonary TB  
90 ~~[14,16,17][12–14]~~ (S1 Table). From the latest meta-analysis, the overall sensitivity and  
91 specificity of ~~the~~ in-house LAMP ~~was~~ 93.0% (95%CI 88.9-95.7) and 91.8% (95%CI 86.4-  
92 95.1), respectively ~~[17][14]~~. One recent study in Thailand reported the sensitivity and the  
93 specificity of the in-house LAMP at 94.4% (95%CI 88.9-97.7) and 94.3% (95%CI 87.2-  
94 98.1), respectively [15]. However, the reported accuracy could be overestimated if being it is  
95 assessed in qualified laboratories with highly skilled technicians and sufficient resources  
96 where molecular tests are usually ~~are~~ available ~~[17][14]~~. Therefore, this study aimed to

Formatted: Font: (Default) Times New Roman, 12 pt

Formatted: Font: 11 pt

Formatted: Font: (Default) Times New Roman, 12 pt

Formatted: Font: 11 pt

Formatted: Font: (Default) Times New Roman

97 evaluate the pragmatic accuracy of the in-house LAMP assay for the diagnosis of pulmonary  
98 TB in a ~~peripheral~~ community hospital of a developing country with a high TB burden.  
99

## 100 **Materials and Methods**

101

### 102 **Ethics Statement**

103 This study was approved by the Research Ethics Committee of Maesot General Hospital, The  
104 Ministry of Public Health (serial number 37/2015) and The Human Research Ethics  
105 Committee of Thammasat University, Faculty of Medicine (COA number 081/2016). The  
106 clinical samples used in this study were collected from all patients as routinely done.  
107 Informed consent was obtained from all patients prior to inclusion.

108

### 109 **Setting**

110 The study was ~~settled-performed~~ in Maesot General Hospital, a large-sized community  
111 hospital with 365 in-patient beds. ~~The hospital~~  located in Maesot ~~district-District~~, in Tak  
112 ~~Province(province)~~, which shares the border with Myanmar. ~~The hospital~~ ~~and~~ provides  
113 standard health care to both Thai and non-Thai patients (Burmese immigrants and ethnic  
114 minorities). According to the Health Data Center, the ~~ministry-Ministry~~ of ~~public-Public~~  
115 ~~healthHealth~~  Thailand, the incidence rate of pulmonary TB in Maesot was 351 per  
116 100,000 in 2019. The ~~level of~~  th care system of the hospital is considered rural. Maesot  
117 hospital has its  reference laboratory with biosafety cabinet infrastructure, BSC class II.  
118 There are four lab technicians and one lab assistant within each working shift. Power  
119 generator (350 kW) and UPS (2.7 kW) were available in case of power outages, which was  
120 infrequent. ~~The m~~Median LAMP test workload per day was 6 (range 4-10).

121

### 122 **Study Design**



123 This prospective diagnostic accuracy research was conducted from April to August 2016.  
124 Adult patients aged more than 15 years old with symptoms indicative of pulmonary TB  
125 (coughing for more than two weeks with or without hemoptysis) and no history of TB were  
126 consecutively enrolled regardless of nationality status. Patients with previously documented  
127 TB history or patients with two contaminated [cultures](#)  missing cultures were excluded  
128 from the study.

129

## 130 **Methods**

131 All patients were given three sealed containers for the collection of morning sputum  
132 specimens. ~~Of all containers sent to the laboratory, only the one with seemingly adequate~~  
133 ~~sputum containing both mucoid or mucopurulent characters with a sample volume of more~~  
134 ~~than 3 ml, was used for the whole investigation procedures as routinely done. Only one~~  
135 ~~sputum specimen with adequate sputum containing both mucoid or mucopurulent characters~~  
136 ~~and a sample volume of more than 3 ml was selected to be used in all investigation~~  
137 ~~procedures.~~ -Specimens were sent for smear microscopy with conventional acid-fast bacilli  
138 (AFB) staining with Ziehl-Neelsen technique and fluorescence acid-fast staining with  
139 Auramine O solution. [The s](#)Smear-positive case was defined according to WHO definitions as  
140 the presence of at least two smears of scanty grade, or one or more smears of 1+ or more. A  
141 smear negative case ~~or AFB smear negative~~ was conversely defined.

142

### 143 **Sputum decontamination and culture examination**

144 For the sputum decontamination process, the collected samples and 2% N-Acetyl-L-cysteine  
145 (NALC) NaOH were poured into a 50 ml sterile centrifuge tube in an equal proportion. [The](#)  
146 ~~and were~~ [specimens were](#) subsequently mixed by vortexing for 30 seconds and left at room

147 temperature (20-25°C) for 15 minutes. Then, the test tubes were filled with phosphate buffer  
148 saline (pH 6.8) until the volume reached the level of 50 ml. The samples were put in a high-  
149 speed refrigerated centrifuge at 3,000 g for 20 minutes. Next, the supernatants were poured  
150 off, leaving the tube with decontaminated sputum samples. Finally, a drop (1 ml) of  
151 phosphate buffer saline (pH 6.8) was used for resuspension of the specimens.

152  
153 For TB culture, the reference test, we performed both conventional culture method on L-J  
154 (Lowenstein-Jensen) medium and BBL MGIT 960 (mycobacterial growth indicator tube)  
155 culture method. The culture media were inoculated with processed sputum specimens and  
156 incubated at 35 to 37°C and monitored weekly for growth until 8 weeks. The sputum samples  
157 were considered as “culture-positive” if growth was detected in either of L-J or MGIT  
158 culture, regardless of the smear status. If growth was not detected in neither of the culture  
159 methods and both microscopy results were negative, the samples were considered as “culture-  
160 negative” or “non-TB patients”. Patients with smear-positive and culture-negative, which  
161 were generally considered as probable TB, were excluded from the analysis. Both smear  
162 microscopy and culture methods were performed according to the standard protocols [18][16].

Formatted: Font: (Default) Times New Roman

### 164 **In-house LAMP test**

165 The LAMP test consists of three steps as follows: DNA extraction, isothermal amplification,  
166 and visual interpretation with fluorescence. ~~The National Institute of Health of Thailand had  
167 developed the TB Fast Amp technique (a modified LAMP procedure) to suite local practice  
168 since 2009. In this study, we followed the TB Fast AMP technique, which was developed by  
169 the National Institute of Health of Thailand and was described in our previous studies  
170 [13,15,19].~~ -The procedures were described as follow. Flexi Gene® DNA Kit (Qiagen co.,  
171 USA) and Protenase K Kit (Qiagen co., USA) were used for DNA extraction-[17,18]. ~~Four~~

Formatted: Font: (Default) Times New Roman

Field Code Changed

172 ~~Six primers (MTB primers, MAV primers, MIN primers, and Muniv primers)~~ were used for  
173 the recognition of ~~six-eight~~ distinct regions on the 16S ribosomal RNA gene of *M.*  
174 *tuberculosis*. Each single LAMP reaction includes 12 µl of TB-Fast AMP mixture (FastAMP  
175 master mix includes 2 µl 10Xbuffer, 4 µl 2mM dNTPs, 3.2 µl 5M betaine, 1.2 µl 100 mM  
176 MgSO<sub>4</sub>, 1.6 µl primer mixture), 1 µl *Bst* DNA polymerase enzyme (New England Biolabs,  
177 Ipswich MA, USA), 1 µl fluorescent detection reagent (FDR; Eiken Chemical Tokyo, Japan)  
178 and 6 µl of extracted DNA samples. Amplification of reaction mixture was performed in the  
179 heating blocks at 65°C for 60 minutes, then examined directly by visual observation. The  
180 LAMP assay was considered “positive” if the color of the reaction mixture changed from  
181 orange to green, or fluorescence was directly observed with the naked eyes. The test was  
182 considered “negative” if the color of the mixture remained unchanged. For quality control,  
183 positive control (test tube with ~~*M. Mycobacterium tuberculosis*~~ genetic materials) and  
184 negative control (test tube without *M. tuberculosis* genetic materials) were included in all  
185 runs.

Formatted: Font: Italic

Formatted: Font: Italic

## 186

### 187 **Statistical Analysis**

188 We used Fisher’s exact probability test for comparison of differences in independent  
189 proportions and Student’s t-test for two independent means. The sensitivity, specificity,  
190 positive predictive values (PPV), negative predictive values (NPV), and positive and negative  
191 likelihood ratios were calculated and reported with its 95% confidence interval. The 95%  
192 confidence interval were estimated using the Clopper Pearson binomial exact method. The  
193 comparison of sensitivity, specificity, and overall test accuracy between the LAMP test and  
194 smear microscopy methods was performed with McNemar’s exact probability test. Pairwise  
195 testing to compare the specificity between the LAMP test and the smear microscopy methods  
196 was not performed as the specificity of the latter was affected by incorporation bias and

197 would not be comparable to the in-house LAMP. The inter-rater reliability and the agreement  
198 correlation of the LAMP test with smear microscopy methods was analyzed with Kappa's  
199 statistics and Spearman's rank correlation, respectively. P-values of less than 0.05 were  
200 considered statistically significant. All statistical analyses were done using Stata version 16  
201 (StataCorp, Texas).  
202

203 **Results**

204 A total of 120 patients to be evaluated for TB were consecutively included from April to  
205 August 2016. Three patients with two contaminated cultures, two patients who subsequently  
206 were detected as previously documented TB cases, and eight patients who had smear-positive  
207 and culture-~~positive-negative~~ results were excluded from the analysis; only 107 patients  
208 remained in the study (Fig. 1). Most of the included patients were male (60% vs. 40%) with a  
209 mean age of 47-~~year~~ . Fifty (46.7%) were culture-positive TB patients and 57 (53.3%)  
210 were culture-negative patients. The baseline demographic data between culture-positive and  
211 culture-negative patients were comparable (Table 1). For clinical characteristics, the presence  
212 of cavitory lesions on chest radiographs and the ~~character of collected sputum~~character of  
213 collected sputum was ~~found to be statistically significantly different~~ (Table 1). Culture-  
214 positive TB patients had higher proportion of cavitory lesions (14.0% vs. 1.8%, p=0.024) and  
215 mucous sputum specimen (52.0% vs 24.6%, p=0.005) than ~~patients those~~ with negative TB  
216 culture. ~~The proportion of patients with salivary sputum was significantly lower than mucous~~  
217 ~~sputum in both smear-positive and -LAMP-positive results was significantly lower in~~  
218 ~~salivary sputum than in mucous sputum (31.3% vs. 57.5%, p=0.009 and 29.9% vs. 60.0%,~~  
219 ~~p=0.003, respectively).~~

220

221

222 **Table 1. Demographic and clinical characteristics of the patients by TB culture status**

| Characteristics          | TB Culture Positive | TB Culture Negative | P-Value |
|--------------------------|---------------------|---------------------|---------|
|                          | (S+ or S-, C+)      | (S-, C-)            |         |
|                          | n=50 (46.7%)        | n=57 (53.3%)        |         |
| Gender                   |                     |                     |         |
| Male                     | 30 (60.0)           | 36 (63.2)           | 0.842   |
| Female                   | 20 (40.0)           | 21 (36.8)           |         |
| Nationality              |                     |                     |         |
| Thai                     | 28 (56.0)           | 21 (36.8)           | 0.054   |
| Non-Thai                 | 22 (44.0)           | 36 (63.2)           |         |
| Age (year, mean±SD)      | 48.7±17.4           | 45.8±18.7           | 0.408   |
| Chest radiographs        |                     |                     |         |
| Without cavitory lesions | 43 (86.0)           | 56 (98.2)           | 0.024   |
| With cavitory lesions    | 7 (14.0)            | 1 (1.8)             |         |
| Character of sputum      |                     |                     |         |
| Salivary                 | 24(48.0)            | 43 (75.4)           | 0.005   |
| Mucous                   | 26 (52.0)           | 14 (24.6)           |         |

223 Abbreviations: TB, tuberculosis; C, culture (+ positive or – negative); S, smear microscopy (+ positive or – negative); SD,  
224 standard deviation.

225

226 **Fig. 1. Study flow diagram of patient enrollment and results of index and reference test**  
227 **based on culture result**

228

229

230 The overall sensitivity of the LAMP test was 82.0% (95%CI 68.6-91.4), whereas the  
231 sensitivity in smear-positive, culture-positive patients and smear-negative, culture-positive  
232 was 90.9% (95%CI 78.3-97.5) and 16.7% (95%CI 0.4-64.1), respectively. The overall  
233 sensitivity of both the AFB and the fluorescence stain was slightly higher than that of the  
234 LAMP test; however, the differences were non-significant (Table 2). The specificity, positive  
235 predictive value, and negative predictive value of [the](#) LAMP test was 94.7% (95%CI 85.4-  
236 98.9), 93.2% (95%CI 81.3-98.6), and 85.7% (95%CI 74.6-93.3), respectively. The positive  
237 and negative likelihood ratios of the LAMP test was 15.6 (95%CI 4.47-82.12) and 0.19  
238 (95%CI 0.08-0.44), respectively. ~~Even though the~~[The](#) accuracy measures for the diagnosis of  
239 TB cases were shown to vary across different test methods (LAMP test, AFB stain, and  
240 fluorescence stain), the differences were without statistical significance (Table 2).  
241 LAMP test results were highly correlated with those of AFB and fluorescence stain  
242 (Spearman's rho 0.85, ~~95%CI 0.74-0.95~~, [p<0.001](#)) in the diagnosis of culture-positive TB  
243 cases (Table 3). The in-house LAMP also showed substantial to [an](#) almost perfect agreement  
244 with both microscopy methods in the diagnosis of culture-positive cases (Kappa 0.85, 95%CI  
245 ~~0.74-0.95~~, [p<0.001](#)) (Table 3).  
246

247 **Table 2. Diagnostic accuracy of the in-house LAMP test, AFB stain, and stain, and**  
 248 **Fluorescence stain.**

| Method                              | Sensitivity% (95% CI), no. corrects |                            |                              |                                | Specificity%                  | Accuracy%                 | PPV%<br>(95% CI)    | NPV<br>(95% CI)    | LR+<br>(95% CI)  | LR-<br>(95% CI) |
|-------------------------------------|-------------------------------------|----------------------------|------------------------------|--------------------------------|-------------------------------|---------------------------|---------------------|--------------------|------------------|-----------------|
|                                     | S+, C+                              |                            | S-, C+                       | Any S, C+                      | (95% CI),<br>no. corrects     | (95% CI),<br>no. corrects |                     |                    |                  |                 |
|                                     | (n=44)                              | (n=6)                      | (n=50)                       | (n=57)                         | (n=107)                       |                           |                     |                    |                  |                 |
| LAMP                                | 90.9<br>(78.3,97.5),<br>N=40        | 16.7<br>(0.4,64.1),<br>n=1 | 82.0<br>(68.6,91.4),<br>n=41 | 94.7<br>(85.4,98.9),<br>n=54   | 88.8<br>(81.2,94.1),<br>n=95  | 93.2<br>(81.3,98.6)       | 85.7<br>(74.6,93.3) | 15.6<br>(4.5,82.1) | 0.2<br>(0.1,0.4) |                 |
| AFB stain                           | -                                   | -                          | 88.0<br>(75.7,95.5),<br>n=44 | 100.0<br>(93.7,100.0),<br>n=57 | 94.4<br>(88.2,97.9),<br>n=101 | 100.0<br>(93.7,100.0)     | 90.5<br>(80.4,96.4) | -                  | -                |                 |
| Fluorescence stain                  | -                                   | -                          | 88.0<br>(75.7,95.5),<br>n=44 | 100.0<br>(93.7,100.0),<br>n=57 | 94.4<br>(88.2,97.9),<br>n=101 | 100.0<br>(93.7,100.0)     | 90.5<br>(80.4,96.4) | -                  | -                |                 |
| LAMP test vs.<br>AFB stain          |                                     |                            | P=0.375*                     | P=0.250*                       | P=1.000*                      |                           |                     |                    |                  |                 |
| LAMP test vs.<br>Fluorescence stain |                                     |                            | P=0.375*                     | P=0.250*                       | P=1.000*                      |                           |                     |                    |                  |                 |

249 \*P-values from McNemar's Exact probability test

250 Abbreviations: AFB, acid fast bacilli; C, culture (+ positive or - negative); CI, confidence interval; LAMP, loop-mediated

251 isothermal amplification; LR+, positive likelihood ratio; LR-, negative likelihood ratio; no. correct, number correctly

252 identified; NPV, negative predictive value; PPV, positive predictive value; S, smear microscopy (+ positive or - negative).

253



254 **Table 3. ~~Diagnostic agreement and correlation~~ Inter-rater reliability and diagnostic**  
 255 **agreement between ~~the an~~ in-house LAMP test and AFB stain-fluorescence stain.**

| LAMP Test                | AFB Stain & Fluorescence stain |          |       |
|--------------------------|--------------------------------|----------|-------|
|                          | Positive                       | Negative | Total |
| Positive                 | 40                             | 4        | 44    |
| Negative                 | 4                              | 59       | 63    |
| Total                    | 44                             | 63       | 107   |
| Agreement (%)            | 92.5%                          |          |       |
| Kappa (95%CI, p-value)   | 0.85 (0.74-0.95, p<0.001)      |          |       |
| Spearman's rho (p-value) | 0.85 (0.74-0.95, p<0.001)      |          |       |

256 Abbreviations: LAMP, loop-mediated isothermal amplification; CI, confidence interval.

257

258

259

## 260 Discussion

261 This study ~~had~~has demonstrated the pragmatic diagnostic performance of ~~the~~our in-house  
262 LAMP assay in a remote hospital of a high TB burden country. ~~It was revealed that the~~The  
263 overall sensitivity ~~of the in-house LAMP in our study~~ was lower than ~~the numbers reported in~~  
264 the majority of the previous in-house LAMP studies [11,15,20–23]. Nonetheless, the  
265 specificity was comparable to other figures reported in the literature [11,12,15,21,22]. ~~In~~  
266 comparison to microscopy methods (~~the~~ AFB and fluorescence stain), the in-house LAMP  
267 was ~~found to be~~ inferior in terms of overall sensitivity (~~82.0% vs. 88.0%, p=0.375~~) and  
268 ~~accuracy (88.8% vs. 94.4%, p=1.000); however, the comparative statistical test revealed non-~~  
269 ~~significant results~~. Based on the result of our study, we suggest that the in-house LAMP  
270 should not be a substitute to conventional smear methods, but should be done in parallel,  
271 which would result in a higher sensitivity with fewer false-negative TB cases.

272 \_\_\_\_\_  
273 ~~In this study, the sensitivity of the in-house LAMP test was 82.0% (95%CI 68.6-91.4) in~~  
274 ~~culture positive TB patients, respectively~~. In the past, several studies ~~had~~ reported a higher  
275 sensitivity of ~~the~~ in-house LAMP tests, ~~which ranges~~ranging from 90.0 to 100.0% [11,15,20–  
276 ~~25]~~[11,15,19–24]. Most of these studies were reported from either University-university  
277 hospitals, TB-specialized centers or hospitals, or national TB-specialized laboratories, which  
278 were generally equipped with ~~highly trained~~highly trained personnel and adequate  
279 infrastructural supports [17]. The overall sensitivity of our in-house LAMP was consistent  
280 with two previous studies from India and Zambia, which was 79.5% (95%CI 64.0-89.0) and  
281 81.4% (95%CI 71.6-89.0), respectively [12,16][12,25]. Although both studies were performed  
282 in University-university hospitals, the LAMP procedures were modified to suit local  
283 conditions, and sputum processing and DNA extraction ~~was~~were done with commercial kits.  
284 The higher sensitivity of the acid-fast stain and the fluorescence stain in our study could be

Formatted: Font: (Default) Times New Roman, 12 pt

Formatted: Font: (Default) Times New Roman, 12 pt

Formatted: Font: (Default) Times New Roman

Formatted: Font: 11 pt

285 explained by the high prevalence of TB, the absence of HIV patients or ~~less-fewer number of~~  
286 patients with paucibacillary sputum, and the availability of skilled technicians [16,26–  
28][12,26–28]. Besides, specimen decontamination with concentrated NaOH decreases the  
288 amount of viable genetic materials for amplification, which could reduce the sensitivity of  
289 both the LAMP test and TB cultures. A lower concentration of NaOH (1-1.5%) or NaOH free  
290 methods during sample decontamination may be suggested [16,29][12,29]. The sensitivity of  
291 the LAMP test in smear-negative specimens could not be accurately estimated in this study as  
292 there were too few smear-negative, culture-positive patients.

Formatted: Font: (Default) Times New Roman

293 \_\_\_\_\_  
294 The overall specificity of the LAMP test was 94.7% (95%CI 85.4-98.9) for non-TB patients,  
295 ~~respectively~~. This was in concordance with a recent meta-analysis, which reported pooled  
296 specificity of ~~the~~ in-house LAMP ~~tests at of~~ 91.8% (95%CI 86.4-95.1) [17][14]. However, ~~it~~  
297 ~~was concluded that~~ the specificity of the in-house assays was lower than that of the Loopamp  
298 commercial kit, which was reported at 96.5% (95%CI 94.7-97.7). A false positive LAMP  
299 result in smear-positive cases was frequently encountered in routine practice, which could be  
300 explained by multiple factors such as higher temperature, higher humidity, suboptimal  
301 reagents volume, and crossover contamination [17,30][14,30]. ~~For in-house LAMP, an~~  
302 ~~extensive laboratory technician training and continuous quality assessment should be~~  
303 ~~conducted to lessen the risk of false positive results. However, other potential factors might~~  
304 ~~still account for the low specificity, such as temperature controls and volume of reaction~~  
305 ~~used~~. For temperature, only available water bath was applied for temperature controls during  
306 LAMP procedures instead of a more stable dry heating block. A recent study suggested a  
307 high reaction volume of 30-35 µl due to the risk of self-priming in concentrated reagents [30].

Formatted: Font: (Default) Times New Roman

Formatted: Font: (Default) Times New Roman

308 \_\_\_\_\_

309 Currently, the WHO only ~~supported~~endorses the use of two rapid molecular tests for the  
310 diagnosis of pulmonary TB, which were Xpert MTB/RIF and the commercialized TB-LAMP  
311 assay [9]. According to previous studies, both had shown comparable performance in smear-  
312 positive samples, but higher sensitivity was shown in Xpert MTB/RIF than in the LAMP test  
313 ~~[6,12][6,25]~~. Xpert MTB/RIF has been endorsed for use in the diagnosis of TB in many  
314 countries, including Thailand [4,31]. ~~Nonetheless, Xpert MTB/RIF might not be suitable in~~  
315 ~~peripheral regions with poor infrastructure as the instrument requires a stable electricity~~  
316 ~~supply and an appropriate environment. The device also requires high continuous~~  
317 ~~maintenance costs leading to a relatively high cost per test compared to the LAMP test. The~~  
318 ~~LAMP test is readily available and can be done in any resource poor settings with regular~~  
319 ~~infrastructure and technicians with adequate training. In Thailand, However,~~ only a portion of  
320 patients, ~~not including~~excluding foreigners and ethnic minorities, could reimburse the cost for  
321 Xpert MTB/RIF due to the regulation stated by The National Health Security Office (NHSO).  
322 To ~~effectively better prevent control~~ the spread of TB, ~~an~~access to rapid diagnostic tools  
323 should be provided to all patients ~~to be evaluated for TB~~ with symptoms suggestive of TB  
324 ~~should have equal access to high quality diagnostic tools~~[3]. ~~Therefore~~For this reason~~Thus, a~~  
325 ~~smear microscopy and the LAMP test assay~~ may be more applicable in terms of accessibility  
326 and affordability, especially in the ~~distant decentralized~~ areas ~~and the borderlands~~[4,32].  
327 \_\_\_\_\_  
328 However, there ~~may be~~were some limitations to this study. First, ~~the study size might not be~~  
329 ~~powered enough to confirm the statistical insignificance of the between test comparison~~the  
330 study size may not be substantial enough to provide the power required to detect a  
331 statistically significant difference between tests. Second, no patients with HIV infection were  
332 included during the study period, as HIV status could be influential to the diagnostic  
333 performance of both the smear microscopy and the LAMP test, especially in areas with a high

Formatted: Font: (Default) Times New Roman

Formatted: Font: (Default) Times New Roman, 12 pt

Formatted: Font: (Default) Times New Roman, 12 pt

334 prevalence of TB-HIV coinfection. Third, ~~this study had~~ there was a higher proportion of  
335 salivary sputum than mucous sputum in this study. This could affect the diagnostic  
336 performance of both the index and the reference test ~~[33][32]. The percentage of culture-~~  
337 ~~positive TB cases was lower in salivary samples than in mucous samples (35.8% vs. 65.0%,~~  
338 ~~p=0.005).~~ Both the quality and quantity of sputum specimens were associated with the  
339 positivity of smear, molecular testing methods (Xpert MTB/RIF and PCR), and TB culture  
340 ~~[34,35][33,34]. Thus, it was possible that~~ some patients with pulmonary TB might be  
341 classified as smear-negative, LAMP-negative, or even culture-negative cases. Sensitivity and  
342 specificity would be improved if higher quality sputum is obtained ~~No previous study had~~  
343 ~~officially addressed the effect of sputum quality on the LAMP test. Moreover, the character~~  
344 ~~of sputum specimens was rarely reported. Interestingly, it was revealed from our data that the~~  
345 ~~proportion of smear-positive, LAMP-positive results was also significantly lower in salivary~~  
346 ~~sputum than in mucous sputum (31.3% vs. 57.5%, p=0.009 and 29.9% vs. 60.0%, p=0.003,~~  
347 ~~respectively).~~ Therefore, the sensitivity and accuracy of all tests, including LAMP, might be  
348 underestimated. Previous studies reported that by improving the sputum quality, TB  
349 diagnostic yield increased. ~~[36,37][35,36]. Thus, high-quality sputum collection must be~~  
350 ~~encouraged both in practice and studies.~~

351 \_\_\_\_\_  
352 Finally, the use of routine TB culture as a reference standard might be inadequate, as some  
353 TB patients could be classified as not having TB [6]. With a higher quality reference  
354 standard, the sensitivity of the in-house LAMP should be increased when a portion of three  
355 remaining false-positive cases was re-classified as true-positive cases. Different culture media  
356 and techniques could be used in composite to achieve different performance characteristics  
357 ~~[38][37]. In our study, two different culture techniques, L-J and MGIT, were used to increase~~  
358 the diagnostic rate of TB ~~[39][38]. We also applied a strict diagnostic definition in calculating~~

Formatted: Font: (Default) Times New Roman, 12 pt

Formatted: Font: 11 pt

Formatted: Font: (Default) Times New Roman, 12 pt

Formatted: Font: 11 pt

Formatted: Font: (Default) Times New Roman, 12 pt

Formatted: Font: 11 pt

Formatted: Font: (Default) Times New Roman, 12 pt

Formatted: Font: 11 pt

Formatted: Font: (Default) Times New Roman, 12 pt

Formatted: Font: 11 pt

359 specificity by considering only patients with smear-negative and culture-negative results

360 ~~[40]~~[39].

361

## 362 Conclusions

363 In conclusion, ~~the a~~ LAMP test is a practical and affordable nucleic amplification technique  
364 for the diagnosis of pulmonary TB, which should be implemented in resource-limited  
365 settings where Xpert MTB/RIF is unavailable. The diagnostic accuracy of the in-house LAMP  
366 was similar to previous studies for specificity. ~~Better sputum processing and DNA extraction  
367 method should be identified to improve the test sensitivity. To improve the test sensitivity, a  
368 better sputum processing and DNA extraction method is essential. The overall accuracy of  
369 the in-house LAMP test showed lower minimal inferiority in terms of sensitivity to than  
370 was comparable to that of conventional microscopy and fluorescence microscopy smear  
371 microscopy with minimal inferiority in terms of sensitivity.~~ Therefore, a parallel examination  
372 of both smear microscopy and the in-house LAMP test is suggested to minimize the risk of  
373 false-negative results, especially in an endemic area.

374

## 375 Acknowledgements

376 The authors wish to acknowledge the contributions of all the medical and nursing staff of the  
377 TB clinic at Maesot hospital for their help in data collection, and all relevant personnel of  
378 The National Institute of Health, Department of Medical Science, The Ministry of Public  
379 Health for their technical advice and support.

380

Formatted: Font: (Default) Times New Roman, 12 pt

Formatted: Font: 11 pt

Formatted: English (United States)

381 **References**

- 382 1. World Health Organization. Global Tuberculosis Report 2018. World Health  
383 Organization; 2018.
- 384 2. Uplekar M, Weil D, Lonnroth K, Jaramillo E, Lienhardt C, Dias HM, et al. WHO's new  
385 end TB strategy. Lancet Lond Engl. 2015;385: 1799–1801. doi:10.1016/S0140-  
386 6736(15)60570-0
- 387 3. Parsons LM, Somoskövi Á, Gutierrez C, Lee E, Paramasivan CN, Abimiku A, et al.  
388 Laboratory Diagnosis of Tuberculosis in Resource-Poor Countries: Challenges and  
389 Opportunities. Clin Microbiol Rev. 2011;24: 314. doi:10.1128/CMR.00059-10
- 390 4. Kim C-K, Cho EA, Shin DM, Choi SW, Shin SY. Comparative Evaluation of the Loop-  
391 Mediated Isothermal Amplification Assay for Detecting Pulmonary Tuberculosis. Ann  
392 Lab Med. 2018;38: 119–124. doi:10.3343/alm.2018.38.2.119
- 393 5. Eddabra R, Ait Benhassou H. Rapid molecular assays for detection of tuberculosis.  
394 Pneumonia. 2018;10. doi:10.1186/s41479-018-0049-2
- 395 6. Shete PB, Farr K, Strnad L, Gray CM, Cattamanchi A. Diagnostic accuracy of TB-  
396 LAMP for pulmonary tuberculosis: a systematic review and meta-analysis. BMC Infect  
397 Dis. 2019;19: 268. doi:10.1186/s12879-019-3881-y
- 398 7. Notomi T, Okayama H, Masubuchi H, Yonekawa T, Watanabe K, Amino N, et al.  
399 Loop-mediated isothermal amplification of DNA. Nucleic Acids Res. 2000;28: e63.
- 400 8. Yan L, Xiao H, Zhang Q. Systematic review: Comparison of Xpert MTB/RIF, LAMP  
401 and SAT methods for the diagnosis of pulmonary tuberculosis. Tuberculosis-Edinb  
402 Seottl. 2016;96: 75–86. doi:10.1016/j.tube.2015.11.005
- 403 9. The Use of Loop-Mediated Isothermal Amplification (TB-LAMP) for the Diagnosis of  
404 Pulmonary Tuberculosis: Policy Guidance. Geneva: World Health Organization; 2016.  
405 Available: <http://www.ncbi.nlm.nih.gov/books/NBK384520/>
- 406 10. Sohn H, Puri L, Nguyen NAT, Van't Hoog AH, Nguyen VAT, Nliwasa M, et al. Cost  
407 and affordability analysis of TB-LAMP and Xpert MTB/RIF assays as routine  
408 diagnostic tests in peripheral laboratories in Malawi and Vietnam. J Glob Health Sci.  
409 2019;1: e22. doi:10.35500/jghs.2019.1.e22
- 410 11. Pandey BD, Poudel A, Yoda T, Tamaru A, Oda N, Fukushima Y, et al. Development of  
411 an in-house loop-mediated isothermal amplification (LAMP) assay for detection of  
412 Mycobacterium tuberculosis and evaluation in sputum samples of Nepalese patients. J  
413 Med Microbiol. 2008;57: 439–443. doi:10.1099/jmm.0.47499-0
- 414 12. Habeenzu C, Nakajima C, Solo E, Bwalya P, Kajino K, Miller M, et al. Evaluation of  
415 in-house loop-mediated isothermal amplification for tuberculosis diagnosis compared  
416 with Xpert MTB/RIF. J Infect Dev Ctries. 2017;11: 440–444. doi:10.3855/jidc.7730

Formatted: Font: (Default) Times New Roman, 12 pt

Formatted: Bibliography, Widow/Orphan control, Adjust space between Latin and Asian text, Adjust space between Asian text and numbers

Formatted: Font: (Default) Times New Roman, 12 pt

- 417 [13. Rudeeaneksin J. Rapid Detection of Mycobacterium Tuberculosis Complex in Sputum](#)  
418 [and in Culture Growth by LAMP Test. J Health Sci. 2017;19: 300–310.](#)
- 419 [14. Rudeeaneksin J, Bunchoo S, Srisungngam S, Sawanpanyalert P, Chamngrom S,](#)  
420 [Kamolwat A, et al. Rapid identification of Mycobacterium tuberculosis in BACTEC](#)  
421 [MGIT960 cultures by in-house loop-mediated isothermal amplification. Jpn J Infect](#)  
422 [Dis. 2012;65: 306–311. doi:10.7883/yoken.65.306](#)
- 423 [15. Phetsuksiri B, Rudeeaneksin J, Srisungngam S, Bunchoo S, Klayut W, Nakajima C, et](#)  
424 [al. Comparison of Loop-Mediated Isothermal Amplification, Microscopy, Culture, and](#)  
425 [PCR for Diagnosis of Pulmonary Tuberculosis. Jpn J Infect Dis. 2020.](#)  
426 [doi:10.7883/yoken.jiid.2019.335](#)[Phetsuksiri B, Rudeeaneksin J, Srisungngam S,](#)  
427 [Bunchoo S, Klayut W, Nakajima C, et al. Comparison of Loop-Mediated Isothermal](#)  
428 [Amplification, Microscopy, Culture, and PCR for Diagnosis of Pulmonary](#)  
429 [Tuberculosis. Jpn J Infect Dis. 2020;advpub. doi:10.7883/yoken.JJID.2019.335](#)
- 430 [16. George G, Mony P, Kenneth J. Comparison of the Efficacies of Loop-Mediated](#)  
431 [Isothermal Amplification, Fluorescence Smear Microscopy and Culture for the](#)  
432 [Diagnosis of Tuberculosis. PLoS ONE. 2011;6. doi:10.1371/journal.pone.0021007](#)
- 433 [17. Nagai K, Horita N, Yamamoto M, Tsukahara T, Nagakura H, Tashiro K, et al.](#)  
434 [Diagnostic test accuracy of loop-mediated isothermal amplification assay for](#)  
435 [Mycobacterium tuberculosis: systematic review and meta-analysis. Sci Rep. 2016;6:](#)  
436 [39090. doi:10.1038/srep39090](#)
- 437 [18. Kent PT. Public Health Mycobacteriology: A Guide for the Level III Laboratory. U.S.](#)  
438 [Department of Health and Human Services, Public Health Service, Centers for Disease](#)  
439 [Control; 1985.](#)
- 440 [19. Phetsuksiri B, Rudeeaneksin J, Srisungngam S, Bunchoo S, Roienthong D, Mukai T, et](#)  
441 [al. Applicability of in-house loop-mediated isothermal amplification for rapid](#)  
442 [identification of Mycobacterium tuberculosis complex grown on solid media. Jpn J](#)  
443 [Infect Dis. 2013;66: 249–251. doi:10.7883/yoken.66.249](#)
- 444 [20. Sethi SK, Singh S, Dhatwalia SK, Yadav R, Mewara A, Singh M, et al. Evaluation of](#)  
445 [In- House Loop- Mediated Isothermal Amplification \(LAMP\) Assay for Rapid](#)  
446 [Diagnosis of M. tuberculosis in Pulmonary Specimens. J Clin Lab Anal. 2013;27: 272–](#)  
447 [276. doi:10.1002/jcla.21596](#)
- 448 [21. Rafati A, Gill P. Microfluidic method for rapid turbidimetric detection of the DNA of](#)  
449 [Mycobacterium tuberculosis using loop-mediated isothermal amplification in capillary](#)  
450 [tubes. Microchim Acta. 2015;182: 523–530. doi:10.1007/s00604-014-1354-y](#)
- 451 [22. Poudel A, Pandey BD, Lekhak B, Rijal B, Sapkota BR, Suzuki Y. Clinical profiling and](#)  
452 [use of loop-mediated isothermal amplification assay for rapid detection of](#)  
453 [Mycobacterium tuberculosis from sputum. Kathmandu Univ Med J KUMJ. 2009;7:](#)  
454 [109–114. doi:10.3126/kumj.v7i2.2701](#)
- 455 [23. Lee M-F, Chen Y-H, Peng C-F. Evaluation of reverse transcription loop-mediated](#)  
456 [isothermal amplification in conjunction with ELISA-hybridization assay for molecular](#)

Formatted: Font: (Default) Times New Roman, 12 pt



- 457 [detection of \*Mycobacterium tuberculosis\*. J Microbiol Methods. 2009;76: 174–180.](#)  
458 [doi:10.1016/j.mimet.2008.10.005](#)
- 459 [24. Li Y, Shi L, Pan A, Cao W, Chen X, Meng H, et al. Evaluation of real-time loop-](#)  
460 [mediated isothermal amplification \(RealAmp\) for rapid detection of \*Mycobacterium\*](#)  
461 [tuberculosis from sputum samples. J Microbiol Methods. 2014;104: 55–58.](#)  
462 [doi:10.1016/j.mimet.2014.06.011](#)
- 463 [25. Kohan L, Shakhosseiny MH, Razavi MR, Parivar K, Moslemi E, Werngren J.](#)  
464 [Evaluation of loop mediated isothermal amplification for diagnosis of \*Mycobacterium\*](#)  
465 [tuberculosis complex in clinical samples. Afr J Biotechnol. 2011;10: 5096–5101.](#)  
466 [doi:10.4314/ajb.v10i26.](#)
- 467 [26. Pandey BD, Poudel A, Yoda T, Tamaru A, Oda N, Fukushima Y, et al. Development of](#)  
468 [an in-house loop-mediated isothermal amplification \(LAMP\) assay for detection of](#)  
469 [Mycobacterium tuberculosis and evaluation in sputum samples of Nepalese patients. J](#)  
470 [Med Microbiol. 2008;57: 439–443. doi:10.1099/jmm.0.47499-0](#)
- 471 [27. Pathak D, Chakravorty S, Hanif M, Tyagi JS. Lysis of tubercle bacilli in fresh and](#)  
472 [stored sputum specimens: implications for diagnosing tuberculosis in stored and](#)  
473 [paucibacillary specimens by PCR. BMC Microbiol. 2007;7: 83. doi:10.1186/1471-2180-](#)  
474 [7-83](#)
- 475 [28. Shea YR, Davis JL, Huang L, Kovacs JA, Masur H, Mulindwa F, et al. High Sensitivity](#)  
476 [and Specificity of Acid-Fast Microscopy for Diagnosis of Pulmonary Tuberculosis in an](#)  
477 [African Population with a High Prevalence of Human Immunodeficiency Virus. J Clin](#)  
478 [Microbiol. 2009;47: 1553–1555. doi:10.1128/JCM.00348-09](#)
- 479 [29. Pham TH, Peter J, Mello FCQ, Parraga T, Lan NTN, Nabeta P, et al. Performance of the](#)  
480 [TB-LAMP diagnostic assay in reference laboratories: Results from a multicentre study.](#)  
481 [Int J Infect Dis IJID Off Publ Int Soc Infect Dis. 2018;68: 44–49.](#)  
482 [doi:10.1016/j.ijid.2018.01.005](#)
- 483 [30. Gray CM, Katamba A, Narang P, Giraldo J, Zamudio C, Joloba M, et al. Feasibility and](#)  
484 [Operational Performance of Tuberculosis Detection by Loop-Mediated Isothermal](#)  
485 [Amplification Platform in Decentralized Settings: Results from a Multicenter Study. J](#)  
486 [Clin Microbiol. 2016;54: 1984–1991. doi:10.1128/JCM.03036-15](#)
- 487 [31. Pai M, Flores LL, Pai N, Hubbard A, Riley LW, Colford JM. Diagnostic accuracy of](#)  
488 [nucleic acid amplification tests for tuberculous meningitis: a systematic review and](#)  
489 [meta-analysis. Lancet Infect Dis. 2003;3: 633–643. doi:10.1016/s1473-3099\(03\)00772-](#)  
490 [2](#)
- 491 [32. Geojith G, Dhanasekaran S, Chandran SP, Kenneth J. Efficacy of loop mediated](#)  
492 [isothermal amplification \(LAMP\) assay for the laboratory identification of](#)  
493 [Mycobacterium tuberculosis isolates in a resource limited setting. J Microbiol Methods.](#)  
494 [2011;84: 71–73. doi:10.1016/j.mimet.2010.10.015](#)
- 495 [33. Shi J, Dong W, Ma Y, Liang Q, Shang Y, Wang F, et al. GeneXpert MTB/RIF](#)  
496 [Outperforms Mycobacterial Culture in Detecting Mycobacterium tuberculosis from](#)

- 497 [Salivary Sputum. In: BioMed Research International \[Internet\]. 2018 \[cited 12 Dec](#)  
498 [2019\]. Available: https://www.hindawi.com/journals/bmri/2018/1514381/](#)
- 499 [34. Ho J, Marks GB, Fox GJ. The impact of sputum quality on tuberculosis diagnosis: a](#)  
500 [systematic review. \*Int J Tuberc Lung Dis Off J Int Union Tuberc Lung Dis.\* 2015;19:](#)  
501 [537–544. doi:10.5588/ijtld.14.0798](#)
- 502 [35. Yoon SH, Lee NK, Yim JJ. Impact of sputum gross appearance and volume on smear](#)  
503 [positivity of pulmonary tuberculosis: a prospective cohort study. \*BMC Infect Dis.\*](#)  
504 [2012;12: 172. doi:10.1186/1471-2334-12-172](#)
- 505 [36. Hirooka T, Higuchi T, Tanaka N, Ogura T. \[The value of proper sputum collection](#)  
506 [instruction in detection of acid-fast bacillus\]. \*Kekkaku.\* 2004;79: 33–37.](#)
- 507 [37. Sicsú AN, Salem JI, Fujimoto LBM, Gonzales RIC, Cardoso M do S de L, Palha PF.](#)  
508 [Educational intervention for collecting sputum for tuberculosis: a quasi-experimental](#)  
509 [study I. \*Rev Lat Am Enfermagem.\* 2016;24. doi:10.1590/1518-8345.0363.2703](#)
- 510 [38. Cudahy P, Shenoi S. Diagnostics for pulmonary tuberculosis. \*Postgrad Med J.\* 2016;92:](#)  
511 [187–193. doi:10.1136/postgradmedj-2015-133278](#)
- 512 [39. Kadioglu EE, Ucar EY, Araz O, Aktas E, Saglam L. A Comparison of Two Different](#)  
513 [Culture Methods for Use in the Diagnosis of Pulmonary Tuberculosis. \*Eurasian J Med.\*](#)  
514 [2014;46: 74–77. doi:10.5152/eajm.2014.19](#)
- 515 [40. Kaku T, Minamoto F, D’Meza R, Morose W, Boncy J, Bijou J, et al. Accuracy of](#)  
516 [LAMP-TB Method for Diagnosing Tuberculosis in Haiti. \*Jpn J Infect Dis.\* 2016;69:](#)  
517 [488–492. doi:10.7883/yoken.JJID.2015.519](#)
- 518 ~~1. World Health Organization. Global Tuberculosis Report 2018. World Health~~  
519 ~~Organization; 2018.~~
- 520 ~~2. Uplekar M, Weil D, Lonnroth K, Jaramillo E, Lienhardt C, Dias HM, et al. WHO’s new~~  
521 ~~end TB strategy. *Lancet Lond Engl.* 2015;385: 1799–1801. doi:10.1016/S0140-~~  
522 ~~6736(15)60570-0~~
- 523 ~~3. Parsons LM, Somoskövi Á, Gutierrez C, Lee E, Paramasivan CN, Abimiku A, et al.~~  
524 ~~Laboratory Diagnosis of Tuberculosis in Resource-Poor Countries: Challenges and~~  
525 ~~Opportunities. *Clin Microbiol Rev.* 2011;24: 314. doi:10.1128/CMR.00059-10~~

Formatted: Font: 12 pt

- 526 4. — Kim C K, Cho EA, Shin DM, Choi SW, Shin SY. Comparative Evaluation of the Loop-  
527 Mediated Isothermal Amplification Assay for Detecting Pulmonary Tuberculosis. *Ann*  
528 *Lab Med.* 2018;38: 119–124. doi:10.3343/alm.2018.38.2.119
- 529 5. — Eddabra R, Ait Benhassou H. Rapid molecular assays for detection of tuberculosis.  
530 *Pneumonia.* 2018;10. doi:10.1186/s41479-018-0049-2
- 531 6. — Shete PB, Farr K, Strnad L, Gray CM, Cattamanchi A. Diagnostic accuracy of TB-  
532 LAMP for pulmonary tuberculosis: a systematic review and meta-analysis. *BMC Infect*  
533 *Dis.* 2019;19: 268. doi:10.1186/s12879-019-3881-y
- 534 7. — Notomi T, Okayama H, Masubuchi H, Yonekawa T, Watanabe K, Amino N, et al.  
535 Loop-mediated isothermal amplification of DNA. *Nucleic Acids Res.* 2000;28: e63.
- 536 8. — Yan L, Xiao H, Zhang Q. Systematic review: Comparison of Xpert MTB/RIF, LAMP  
537 and SAT methods for the diagnosis of pulmonary tuberculosis. *Tuberc Edinb Scotl.*  
538 2016;96: 75–86. doi:10.1016/j.tube.2015.11.005
- 539 9. — The Use of Loop-Mediated Isothermal Amplification (TB-LAMP) for the Diagnosis of  
540 Pulmonary Tuberculosis: Policy Guidance. Geneva: World Health Organization; 2016.  
541 Available: <http://www.ncbi.nlm.nih.gov/books/NBK384520/>
- 542 10. — Sohn H, Puri L, Nguyen NAT, Van't Hoog AH, Nguyen VAT, Nliwasa M, et al. Cost  
543 and affordability analysis of TB-LAMP and Xpert MTB/RIF assays as routine  
544 diagnostic tests in peripheral laboratories in Malawi and Vietnam. *J Glob Health Sci.*  
545 2019;1: e22. doi:10.35500/jghs.2019.1.e22
- 546 11. — Pandey BD, Poudel A, Yoda T, Tamaru A, Oda N, Fukushima Y, et al. Development of  
547 an in-house loop-mediated isothermal amplification (LAMP) assay for detection of

- 548 *Mycobacterium tuberculosis* and evaluation in sputum samples of Nepalese patients. *J*  
549 *Med Microbiol.* 2008;57: 439–443. doi:10.1099/jmm.0.47499-0
- 550 12.—George G, Mony P, Kenneth J. Comparison of the Efficacies of Loop-Mediated  
551 Isothermal Amplification, Fluorescence Smear Microscopy and Culture for the  
552 Diagnosis of Tuberculosis. *PLoS ONE.* 2011;6. doi:10.1371/journal.pone.0021007
- 553 13.—Rudeeaneksin J, Bunchoo S, Srisungngam S, Sawanpanyalert P, Chamnangrom S,  
554 Kamolwat A, et al. Rapid identification of *Mycobacterium tuberculosis* in BACTEC  
555 MGIT960 cultures by in-house loop-mediated isothermal amplification. *Jpn J Infect*  
556 *Dis.* 2012;65: 306–311. doi:10.7883/yoken.65.306
- 557 14.—Nagai K, Horita N, Yamamoto M, Tsukahara T, Nagakura H, Tashiro K, et al.  
558 Diagnostic test accuracy of loop-mediated isothermal amplification assay for  
559 *Mycobacterium tuberculosis*: systematic review and meta-analysis. *Sci Rep.* 2016;6:  
560 39090. doi:10.1038/srep39090
- 561 15.—Phetsuksiri B, Rudeeaneksin J, Srisungngam S, Bunchoo S, Klayut W, Nakajima C, et  
562 al. Comparison of Loop-Mediated Isothermal Amplification, Microscopy, Culture, and  
563 PCR for Diagnosis of Pulmonary Tuberculosis. *Jpn J Infect Dis.* 2020;advpub.  
564 doi:10.7883/yoken.JJID.2019.335
- 565 16.—Kent PT. *Public Health Mycobacteriology: A Guide for the Level III Laboratory.* U.S.  
566 Department of Health and Human Services, Public Health Service, Centers for Disease  
567 Control; 1985.
- 568 17.—Phetsuksiri B, Rudeeaneksin J, Srisungngam S, Bunchoo S, Roienthong D, Mukai T, et  
569 al. Applicability of in-house loop-mediated isothermal amplification for rapid

570 identification of Mycobacterium tuberculosis complex grown on solid media. *Jpn J*  
571 *Infect Dis.* 2013;66: 249–251. doi:10.7883/yoken.66.249

572 18. Rudeeaneksin J. Rapid Detection of Mycobacterium Tuberculosis Complex in Sputum  
573 and in Culture Growth by LAMP Test. *J Health Sci* 2017;19: 300–  
574 310.

575 19. Rafati A, Gill P. Microfluidic method for rapid turbidimetric detection of the DNA of  
576 Mycobacterium tuberculosis using loop-mediated isothermal amplification in capillary  
577 tubes. *Microchim Acta.* 2015;182: 523–530. doi:10.1007/s00604-014-1354-y

578 20. Poudel A, Pandey BD, Lekhak B, Rijal B, Sapkota BR, Suzuki Y. Clinical profiling and  
579 use of loop-mediated isothermal amplification assay for rapid detection of  
580 Mycobacterium tuberculosis from sputum. *Kathmandu Univ Med J KUMJ.* 2009;7:  
581 109–114. doi:10.3126/kumj.v7i2.2701

582 21. Sethi SK, Singh S, Dhatwalia SK, Yadav R, Mewara A, Singh M, et al. Evaluation of  
583 In-House Loop-Mediated Isothermal Amplification (LAMP) Assay for Rapid  
584 Diagnosis of M. tuberculosis in Pulmonary Specimens. *J Clin Lab Anal.* 2013;27: 272–  
585 276. doi:10.1002/jcla.21596

586 22. Li Y, Shi L, Pan A, Cao W, Chen X, Meng H, et al. Evaluation of real-time loop-  
587 mediated isothermal amplification (RealAmp) for rapid detection of Mycobacterium  
588 tuberculosis from sputum samples. *J Microbiol Methods.* 2014;104: 55–58.  
589 doi:10.1016/j.mimet.2014.06.014

590 23. Lee M-F, Chen Y-H, Peng C-F. Evaluation of reverse transcription loop-mediated  
591 isothermal amplification in conjunction with ELISA hybridization assay for molecular

Formatted: Font: 12 pt

Formatted: Font: 12 pt

- 592 detection of *Mycobacterium tuberculosis*. *J Microbiol Methods*. 2009;76: 174–180.  
593 doi:10.1016/j.mimet.2008.10.005
- 594 24. Kohan L, Shahhosseiny MH, Razavi MR, Parivar K, Moslemi E, Werngren J.  
595 Evaluation of loop-mediated isothermal amplification for diagnosis of *Mycobacterium*  
596 *tuberculosis* complex in clinical samples. *Afr J Biotechnol*. 2011;10: 5096–5101.  
597 doi:10.4314/ajb.v10i26.
- 598 25. Habeenzu C, Nakajima C, Solo E, Bwalya P, Kajino K, Miller M, et al. Evaluation of  
599 in-house loop-mediated isothermal amplification for tuberculosis diagnosis compared  
600 with Xpert MTB/RIF. *J Infect Dev Ctries*. 2017;11: 440–444. doi:10.3855/jide.7730
- 601 26. Pandey BD, Poudel A, Yoda T, Tamaru A, Oda N, Fukushima Y, et al. Development of  
602 an in-house loop-mediated isothermal amplification (LAMP) assay for detection of  
603 *Mycobacterium tuberculosis* and evaluation in sputum samples of Nepalese patients. *J*  
604 *Med Microbiol*. 2008;57: 439–443. doi:10.1099/jmm.0.47499-0
- 605 27. Pathak D, Chakravorty S, Hanif M, Tyagi JS. Lysis of tubercle bacilli in fresh and  
606 stored sputum specimens: implications for diagnosing tuberculosis in stored and  
607 paucibacillary specimens by PCR. *BMC Microbiol*. 2007;7: 83. doi:10.1186/1471-2180-  
608 7-83
- 609 28. Shea YR, Davis JL, Huang L, Kovacs JA, Masur H, Mulindwa F, et al. High Sensitivity  
610 and Specificity of Acid-Fast Microscopy for Diagnosis of Pulmonary Tuberculosis in an  
611 African Population with a High Prevalence of Human Immunodeficiency Virus. *J Clin*  
612 *Microbiol*. 2009;47: 1553–1555. doi:10.1128/JCM.00348-09
- 613 29. Pham TH, Peter J, Mello FCQ, Parraga T, Lan NTN, Nabeta P, et al. Performance of the  
614 TB-LAMP diagnostic assay in reference laboratories: Results from a multicentre study.

- 615 ~~Int J Infect Dis IJID Off Publ Int Soc Infect Dis. 2018;68: 44–49.~~  
616 ~~doi:10.1016/j.ijid.2018.01.005~~
- 617 30. ~~Gray CM, Katamba A, Narang P, Giraldo J, Zamudio C, Joloba M, et al. Feasibility and~~  
618 ~~Operational Performance of Tuberculosis Detection by Loop-Mediated Isothermal~~  
619 ~~Amplification Platform in Decentralized Settings: Results from a Multicenter Study. J~~  
620 ~~Clin Microbiol. 2016;54: 1984–1991. doi:10.1128/JCM.03036-15~~
- 621 31. ~~Pai M, Flores LL, Pai N, Hubbard A, Riley LW, Colford JM. Diagnostic accuracy of~~  
622 ~~nucleic acid amplification tests for tuberculous meningitis: a systematic review and~~  
623 ~~meta-analysis. Lancet Infect Dis. 2003;3: 633–643. doi:10.1016/s1473-3099(03)00772-~~  
624 ~~2~~
- 625 32. ~~Shi J, Dong W, Ma Y, Liang Q, Shang Y, Wang F, et al. GeneXpert MTB/RIF~~  
626 ~~Outperforms Mycobacterial Culture in Detecting Mycobacterium tuberculosis from~~  
627 ~~Salivary Sputum. In: BioMed Research International [Internet]. 2018 [cited 12 Dec~~  
628 ~~2019]. Available: <https://www.hindawi.com/journals/bmri/2018/1514381/>~~
- 629 33. ~~Ho J, Marks GB, Fox GJ. The impact of sputum quality on tuberculosis diagnosis: a~~  
630 ~~systematic review. Int J Tuberc Lung Dis Off J Int Union Tuberc Lung Dis. 2015;19:~~  
631 ~~537–544. doi:10.5588/ijtld.14.0798~~
- 632 34. ~~Yoon SH, Lee NK, Yim JJ. Impact of sputum gross appearance and volume on smear~~  
633 ~~positivity of pulmonary tuberculosis: a prospective cohort study. BMC Infect Dis.~~  
634 ~~2012;12: 172. doi:10.1186/1471-2334-12-172~~
- 635 35. ~~Hirooka T, Higuchi T, Tanaka N, Ogura T. [The value of proper sputum collection~~  
636 ~~instruction in detection of acid-fast bacillus]. Kekkaku. 2004;79: 33–37.~~

- 637 36.— Siesú AN, Salem JJ, Fujimoto LBM, Gonzales RIC, Cardoso M do S de L, Palha PF.  
638 Educational intervention for collecting sputum for tuberculosis: a quasi-experimental  
639 study 1. *Rev Lat Am Enfermagem*. 2016;24. doi:10.1590/1518-8345.0363.2703
- 640 37.— Cudahy P, Sheno S. Diagnostics for pulmonary tuberculosis. *Postgrad Med J*. 2016;92:  
641 187–193. doi:10.1136/postgradmedj-2015-133278
- 642 38.— Kadioglu EE, Ucar EY, Araz O, Aktas E, Saglam L. A Comparison of Two Different  
643 Culture Methods for Use in the Diagnosis of Pulmonary Tuberculosis. *Eurasian J Med*.  
644 2014;46: 74–77. doi:10.5152/eajm.2014.19
- 645 39.— Kaku T, Minamoto F, D'Meza R, Morose W, Boney J, Bijou J, et al. Accuracy of  
646 LAMP TB Method for Diagnosing Tuberculosis in Haiti. *Jpn J Infect Dis*. 2016;69:  
647 488–492. doi:10.7883/yoken.JJID.2015.519

648

649



650 **Supporting information**

651 **S1 Table. Review on diagnostic accuracy of in-house LAMP assays for diagnosis of**  
652 **pulmonary tuberculosis (DOCX)**

653 **S2 Table. LAMP minimal dataset (CSV)**

654

## Response to Reviewers

We want to thank both the editor and the reviewers for granting the opportunity to revise our manuscript for publication in the PLOS one journal. We hope that our responses and revisions would substantially improve the quality of our manuscript and would be qualified for publication in the journal. If there were any further questions or minor points to be addressed or elaborated, please let us know. We would be more than eager to make any further revision.

### Editor's comments

Specific comments:

1. Abstract and Tables: Change the format 95%CI to be consistent with the rest of the manuscript, for example "95%CI 78.3,97.5" should be "95%CI 78.3-97.5".
  - Changed as suggested.
2. Line 80, implicated has negative meaning, suggest changing to implemented.
  - We modified the first two sentences as "As financial resources are usually limited in countries with high TB prevalence, a commercial TB-LAMP could still be unattainable. More affordable in-house LAMP assays were later developed and applied in several centers".
3. Line 162 change *M. tuberculosis* to *Mycobacterium tuberculosis* since this is the first time you mentioned the bacteria. Also, all the "M." need to be italicized in *M. tuberculosis* throughout the manuscript.
  - Corrected as suggested.
4. Line 192 – 193, should the "smear-positive and culture-positive results" be "smear-positive and culture-negative results"?
  - Corrected as suggested.
5. Line 243 – 246: These sentences need reference(s)
  - We inserted some references to the two sentences as suggested.

### Reviewer's comments

Thank you to the authors for the revisions made. This is a much better paper to present what is important work. However, I still have a few concerns. These focus on clarification of the 'in-house assay' and the discussion. Additionally, I think a review of the paper by a medical writer or any strong English editor would boost the communication of the results enormously.

1. The paper needs to be reviewed in detail for grammar and English. Other than general tidiness, in a number of places, the intent of what the authors are saying is lost due to odd grammar choices. For the best readability and better reach for the research contained, a review of the writing is recommended. I have made a few notes and suggestions in specific places.
  - a. We corrected all of your English suggestions.
  - b. We also modified and re-written some of the sentences in the manuscript to improve the readability.
2. The difference in assays still needs to be clearer. An 'in-house assay' is one that is not performed from a kit. You refer to 'the in-house' LAMP assay a lot as if there is only one,

which is not the case. There are many papers out there with different ‘in-house’ LAMP assays. From the introduction, it sounds like you are presenting the findings from an in-house assay you developed following the protocol presented in Pandey et al. If so, this needs to be stated very clearly. However, from the methods section, it does not necessarily sound like you are not following that protocol and that this is a unique in-house assay. Please clarify in the paper.

- a. We made the modification and improved the clarity of our in-house LAMP method as suggested.
3. When discussing previous results and meta-analyses, it needs to be clear that these refer to ‘in-house LAMP assays’ and not ‘the in-house LAMP assay’ as they are not uniform.
  - a. Corrected as suggested.
4. Inclusion of ‘Accuracy’ in Table 2 is a bit odd, but it can be kept if it is defined in the statistical methods section.
  - a. It was pre-specified in the methods section.
5. The discussion has a lengthy discourse on the costs of Xpert vs LAMP. But there is no referencing of the studies that have costed these two in order to make a proper comparison. It feels quite unsupported.
  - a. We removed unsupported statements from the paragraph and make the paragraph more concise.
6. In the discussion, the authors state ‘No previous study had officially addressed the effect of sputum quality on the LAMP test’. I’m not sure this is true and would caution the authors not to make such a sweeping statement.
  - a. We removed the sentence out of the discussion section as suggested.
7. In the discussion, “Interestingly, it was revealed from our data that the proportion of smear-positive, LAMP-positive results was also significantly lower in salivary sputum than in mucous sputum (31.3% vs. 57.5%,  $p=0.009$  and 29.9% vs. 60.0%,  $p=0.003$ , respectively). Therefore, the sensitivity and accuracy of all tests, including LAMP, might be underestimated.”
  - 1) Do not present new results in the discussion – these need to be included in the Results section first.
  - 2) are these sensitivity? Specificity? Accuracy?
  - 3) This is not an interpretation that makes sense. The sensitivity/specificity is reported based on the best sputum sample available from the patients – quality samples are difficult to obtain. You can instead interpret it as ‘Sensitivity and specificity would be improved if higher quality sputum is obtained’.
    - a. We modified the content as suggested.
    - b. We moved the findings to the results section.
8. In general, the discussion needs to be revised to make only statements supported by the literature, the study, or a comparison of the two. Much of the discussion feels like the authors musings.
  - a. We modified the whole discussion sections to be as objective as possible.
9. In the discussion, I would suggest focusing on sensitivity and specificity and not accuracy as accuracy is not a common way of discussing or assessing diagnostic tests due to its difficulty of interpretation.
  - a. Corrected as suggested.
10. The references as displayed in the reference section aren’t quite right. In reference #1, instead of Lancet, the Journal is listed as Lancet Lond Engl which is not correct. This inclusion of a city occurs in reference #7 as well.
  - a. Corrected as suggested.
